# Supplementary material for: Family satisfaction with critical care in the UK: a multicentre cohort study
Source: PubMed Central journal article supplement (PMC6707657; doi:10.1136/bmjopen-2019-028956), 2019-08-20
Supplement: bmjopen-2019-028956.draft_revisions.pdf [file bmjopen-2019-028956.draft_revisions.pdf]

# BMJ Open

BMJ Open is committed to open peer review. As part of this commitment we make the peer review history of every article we publish publicly available.

When an article is published we post the peer reviewers' comments and the authors' responses online. We also post the versions of the paper that were used during peer review. These are the versions that the peer review comments apply to.

The versions of the paper that follow are the versions that were submitted during the peer review process. They are not the versions of record or the final published versions. They should not be cited or distributed as the published version of this manuscript.

BMJ Open is an open access journal and the full, final, typeset and author-corrected version of record of the manuscript is available on our site with no access controls, subscription charges or pay-per-view fees (<http://bmjopen.bmj.com>).

If you have any questions on BMJ Open's open peer review process please email [info.bmjopen@bmj.com](mailto:info.bmjopen@bmj.com)

# BMJ Open

## Family satisfaction with critical care in the United Kingdom: a multi-centre cohort study

|                               |                                                                                                                                                                                                                                                                                                                                                                                                                                                                                                                                                                                                                                                                                                                                                                                                                                                                                                                                                                                                                                                                                                                                          |
|-------------------------------|------------------------------------------------------------------------------------------------------------------------------------------------------------------------------------------------------------------------------------------------------------------------------------------------------------------------------------------------------------------------------------------------------------------------------------------------------------------------------------------------------------------------------------------------------------------------------------------------------------------------------------------------------------------------------------------------------------------------------------------------------------------------------------------------------------------------------------------------------------------------------------------------------------------------------------------------------------------------------------------------------------------------------------------------------------------------------------------------------------------------------------------|
| Journal:                      | <i>BMJ Open</i>                                                                                                                                                                                                                                                                                                                                                                                                                                                                                                                                                                                                                                                                                                                                                                                                                                                                                                                                                                                                                                                                                                                          |
| Manuscript ID                 | bmjopen-2019-028956                                                                                                                                                                                                                                                                                                                                                                                                                                                                                                                                                                                                                                                                                                                                                                                                                                                                                                                                                                                                                                                                                                                      |
| Article Type:                 | Research                                                                                                                                                                                                                                                                                                                                                                                                                                                                                                                                                                                                                                                                                                                                                                                                                                                                                                                                                                                                                                                                                                                                 |
| Date Submitted by the Author: | 11-Jan-2019                                                                                                                                                                                                                                                                                                                                                                                                                                                                                                                                                                                                                                                                                                                                                                                                                                                                                                                                                                                                                                                                                                                              |
| Complete List of Authors:     | Ferrando, Paloma; Intensive Care National Audit and Research Centre, Gould, Doug; Intensive Care National Audit and Research Centre Walmsley, Emma; Intensive Care National Audit and Research Centre Richards-Belle, Alvin; Intensive Care National Audit and Research Centre Canter, Ruth; Intensive Care National Audit and Research Centre Saunders, Steven; Intensive Care National Audit and Research Centre Harrison, David; Intensive Care National Audit and Research Centre Harvey, Sheila; London School of Hygiene & Tropical Medicine, Global Health and Development<br>Heyland, Daren; Kingston General Hospital, Clinical Evaluation Research Unit; Queens University, Department of Medicine<br>Hinton, Lisa; University of Oxford, Health Experiences Research Group, Nuffield Department of Primary Care Health Sciences<br>McColl, Elaine; Newcastle Clinical Trials Unit<br>Richardson, Annette; Freeman Hospital, Perioperative and Critical Care<br>Richardson, Michael<br>Wright, Stephen; Freeman Hospital, Perioperative and Critical Care<br>Rowan, Kathryn; Intensive Care National Audit and Research Centre |
| Keywords:                     | Adult intensive & critical care < ANAESTHETICS, Quality in health care < HEALTH SERVICES ADMINISTRATION & MANAGEMENT, Family satisfaction                                                                                                                                                                                                                                                                                                                                                                                                                                                                                                                                                                                                                                                                                                                                                                                                                                                                                                                                                                                                |
|                               |                                                                                                                                                                                                                                                                                                                                                                                                                                                                                                                                                                                                                                                                                                                                                                                                                                                                                                                                                                                                                                                                                                                                          |

SCHOLARONE™  
Manuscripts

## Family satisfaction with critical care in the United Kingdom: a multi-centre cohort study

### Authors

Paloma Ferrando-Vivas, *statistician*<sup>1</sup>, Doug W Gould, *senior researcher*<sup>1</sup>, Emma Walmsley, *study co-ordinator*<sup>1</sup>, Alvin Richards-Belle, *trial manager*<sup>1</sup>, Ruth R Canter, *research assistant*<sup>1</sup>, Steven Saunders, *research administrator*<sup>1</sup>, David A Harrison, *head statistician*<sup>1</sup>, Sheila E Harvey, *Associate Professor*<sup>2</sup>, Daren K Heyland, *director of the Kingston General Hospital Clinical Evaluation Research Unit and professor of medicine and epidemiology*<sup>3</sup>, Lisa Hinton, *senior qualitative researcher*<sup>4</sup>, Elaine McColl, *director of Newcastle CTU and professor of health services research*<sup>5</sup>, Annette Richardson, *nurse consultant in critical care*<sup>6</sup>, Michael Richardson, *patient public representative*<sup>7</sup>, Stephen E Wright, *consultant in anaesthesia and intensive care*<sup>6</sup>, Kathryn M Rowan, *director of scientific & strategic development*<sup>1</sup>.

<sup>1</sup>Intensive Care National Audit & Research Centre (ICNARC), London, United Kingdom, WC1V 6AZ

<sup>2</sup>London School of Hygiene & Tropical Medicine, Global Health and Development, London, United Kingdom

<sup>3</sup>Kingston General Hospital, Clinical Evaluation Research Unit, Kingston, Canada and Queen's University, Department of Medicine, School of Medicine, Canada.

<sup>4</sup> University of Oxford, Health Experiences Research Group, Nuffield Department of Primary Care Health Sciences, Oxford, United Kingdom.

<sup>5</sup>Newcastle Clinical Trials Unit, Newcastle University, Newcastle upon Tyne, United Kingdom.

<sup>6</sup>Freeman Hospital, Perioperative and Critical Care, Newcastle Upon Tyne Hospitals NHS Foundation Trust, Newcastle upon Tyne, United Kingdom.

<sup>7</sup>Newcastle Upon Tyne, United Kingdom.

### Corresponding author:

Kathryn M. Rowan (ORCID iD: 0000 0001 8217 5602), Director of Scientific & Strategic Development, Intensive Care National Audit & Research Centre, Napier House, 24 High Holborn, London WC1V 6AZ

Tel: 020 7831 6878

Fax: 020 7831 6879

e-mail: [Kathy.rowan@icnarc.org](mailto:Kathy.rowan@icnarc.org)

## Abstract

**Objective:** To assess family satisfaction with intensive care units (ICUs) in the United Kingdom using the Family Satisfaction in the Intensive Care Unit 24-item questionnaire (FS-ICU-24), and to investigate how characteristics of patients and their family members impact on family satisfaction.

**Design:** Prospective cohort study nested within a national clinic audit database.

**Setting:** Stratified, random sample of 20 adult general ICUs participating in the Intensive Care Audit & Research Centre (ICNARC) Case Mix Programme.

**Participants:** Family members of patients staying at least 24 hours in ICU were recruited between May 2013 and June 2014

**Interventions:** Consenting family members were sent a postal questionnaire three weeks after the patient died or was discharged from ICU. Up to four family members were recruited per patient.

**Main outcome measures:** Family satisfaction measured using the UK FS-ICU-24 questionnaire.

**Main Results:** 12,346 family members of 6380 patients were recruited and 7173 (58%) family members of 4615 patients returned a completed questionnaire. Overall and domain specific family satisfaction scores were high (mean overall family satisfaction 80, satisfaction with care 83, satisfaction with information 76, and satisfaction with decision-making 73 out of 100) but varied significantly across adult general ICUs studied and by whether the patient survived ICU. For family members of ICU survivors, characteristics of both family member (age, ethnicity, relationship to patient (next-of-kin and/or lived with patient) and visit frequency) and the patient (acute severity of illness and receipt of invasive mechanical ventilation) were significant determinants of family satisfaction, whereas, for family members of ICU non-survivors, only patient characteristics (age, acute severity of illness, and duration of stay) were significant.

**Conclusions:** Overall family satisfaction in UK adult general ICUs was high but varied significantly. Adjustment for differences in family member/patient characteristics is important to avoid falsely identifying ICUs as outliers.

**Study registration:** ISRCTN 47363549

1  
2  
3 **Keywords:** critical care; intensive care units; personal satisfaction; family; quality of care;  
4  
5 communication  
6  
7  
8  
9

### 10 11 **Strengths and limitations of this study**

- 12
- 13 • This is the largest study assessing family satisfaction with ICU care.
- 14 • Unbiased selection and stratification of participating units ensured geographical
- 15 spread (north, south, east, and west England, Wales and Northern Ireland), hospital
- 16 type (university or non-university) and ICUs of different sizes (large or small – based
- 17 on number of beds) that recruited for one year to avoid bias from seasonal variation.
- 18 • Nesting our study within the Case Mix Programme national clinical audit was efficient
- 19 and allowed for linkage of family members' to patient data.
- 20 • The same mode and timing of delivery of the FS-ICU-24 was employed for family
- 21 members of ICU survivors and non-survivors, avoiding potential sampling bias and
- 22 allowing for meaningful comparisons between these groups.
- 23 • Despite our very large sample size, we achieved a modest response rate (58%), which
- 24 was in line with previous published studies.
- 25  
26  
27  
28  
29  
30

31  
32  
33  
34  
35  
36  
37  
38  
39  
40  
41  
42  
43  
44  
45  
46  
47  
48  
49  
50  
51  
52  
53  
54  
55  
56  
57  
58  
59  
60

Review only

## Introduction

Humanity of health care, often measured as patient experience, is increasingly seen as one of the three pillars of quality, alongside effectiveness and equity. Eliciting the views and experiences of patients is now seen as essential in delivering a high quality service (1). However, given that approximately 20% of patients admitted to intensive care units (ICUs) die and survivors are often unable to recall their experiences, measuring patient experience in ICU has particular challenges. For this reason, measures of family experience have been developed to help understand the humanity of ICU care.

The most widely validated measure of family experience is the Family Satisfaction in the Intensive Care Unit questionnaire (FS-ICU). This describes satisfaction, overall and in two domains – *satisfaction with care* and *satisfaction with decision making* (2-4). The overall aim of the Family-Reported Experiences Evaluation (FREE) study was to inform the potential routine use of the FS-ICU-24 questionnaire for quality improvement in adult general ICUs in the UK.

This paper reports the results of a large, prospective, multicentre, cohort study describing family satisfaction with ICU care in the UK, investigates how characteristics of patients and their family members impact on family satisfaction, and explores if family satisfaction, varies across ICUs, before and after adjustment for family member and patient characteristics identified as being associated with family satisfaction.

## Methods

This large, prospective, multicentre cohort study was nested in the Intensive Care National Audit & Research Centre (ICNARC) Case Mix Programme (CMP) – the national clinical audit of adult general ICUs in England, Wales and Northern Ireland. A stratified sample of 20 ICUs were selected to ensure geographical spread (north, south, east, and west England, Wales and Northern Ireland), hospital type (university or non-university) and ICUs of different sizes (large or small – based on number of beds) and recruited for one year to avoid bias from seasonal variation. The study was reviewed and approved by the National Research Ethics Service Committee South Central - Berkshire B (reference 13/SC/0037) and was registered prospectively (ISRCTN47363549).

## Patient and Public Involvement

Engagement with patient and their family members was vital to ensuring the successful delivery of the FREE study. A former critical care patient and a family member of a former critical care patient

1  
2  
3 were co-investigators on the FREE study and contributed to all aspects of the study including: design;  
4 conduct; management; analysis; interpretation of results; and dissemination as members of the  
5 study management group. Additionally, the study steering committee included patient and family  
6 members.  
7  
8  
9

### 10 **Recruitment and follow-up**

11  
12  
13 Recruitment and follow-up of family members have been described in detail elsewhere (5). Briefly, a  
14 'family member' was defined as any person with close familial, social or emotional relationship to  
15 the patient and was not restricted solely to next-of-kin. Up to four family members of patients who  
16 spent  $\geq 24$  hours in ICU were eligible to participate if they met the following criteria: aged  $\geq 18$  years;  
17 had physically visited the patient's bedside at least once after the first 24 hours; had a UK postal  
18 address; and had not already been recruited into the study.  
19  
20  
21  
22

23  
24 Patients were followed-up to ICU discharge. Approximately three weeks after the patient had either  
25 been discharged from or died in the ICU, a questionnaire pack was mailed to their recruited and  
26 consented family member(s) direct from the ICNARC Clinical Trials Unit. Data from completed  
27 questionnaires were entered centrally onto a secure database. Quality checking of entered data was  
28 conducted and, for a 20% random sample, accuracy was verified. All fields in the database with  
29 missing data were verified against the paper questionnaires.  
30  
31  
32  
33

### 34 **Statistical analysis**

35  
36  
37 Item responses were rescaled and, where relevant, reversed, according to the developer's rules, so  
38 that each response was on a scale from 0 (least satisfied) to 100 (most satisfied) (4). Recent work  
39 from our group (6) established the construct validity of the FS-ICU 24-item questionnaire (FS-ICU-24)  
40 was improved by using three domains (splitting the *satisfaction with decision making* domain into  
41 two – *satisfaction with information* and *satisfaction with decision making process*). Overall family  
42 satisfaction score and three domain scores were calculated by averaging the item responses for the  
43 relevant items.  
44  
45  
46  
47  
48

49  
50 Family member and patient characteristics were described by mean and standard deviation (SD),  
51 median and quartiles, or number and percentage stratified by the patient outcome (alive/dead).  
52 Variation in family satisfaction was analysed across the following factors: patient; family member;  
53 ICU/hospital (hospital teaching status and number of beds in the ICU); and other contextual. These  
54 factors were then explored using univariable and multivariable multilevel linear regression models  
55 (7) with a primary outcome of the overall family satisfaction score. In secondary analyses, separate  
56 models were fitted for the three individual domains of family satisfaction. Separate models were  
57  
58  
59  
60

1  
2  
3 fitted for family members of ICU survivors and non-survivors. All analyses were conducted in  
4 Stata/SE Version 13.0 (StataCorp, College Station, TX).  
5  
6

7 Variation in family satisfaction across ICUs was assessed graphically using funnel plots, which plot  
8 the average family satisfaction score for each critical care unit against the number of family  
9 members returning questionnaires. Control limits placed at 2 and 3 SDs around the overall mean  
10 indicate the regions of the funnel within which we would expect 95% and 99.8% of points to lie if all  
11 variation was due to chance (8).  
12  
13  
14  
15

16 Due to the natural structure of the data and the planned analysis multilevel multiple imputation  
17 (MLMI) was used to complete non- and partial responses for outcomes and family member  
18 characteristics. Data were imputed using REALCOM-Impute, an MLwiN 2.15 macro that generates  
19 imputations for hierarchical data (9). To test whether our findings were influenced by using imputed  
20 data, we also conducted sensitivity analyses using a traditional approach to scoring the FS-ICU-24 by  
21 including only responders with  $\geq 60\%$  of items completed.  
22  
23  
24  
25  
26  
27  
28  
29

## 30 Results

31 Of the 210 adult, general ICUs participating in the CMP, 142 (67.6%) expressed an interest in  
32 participating and the 20 ICUs were selected using stratified, random sampling. The characteristics  
33 and outcomes of all admissions to the study ICUs were similar to admissions to all ICUs in the CMP  
34 during the same period (Supplementary Table S1).  
35  
36  
37  
38

39 Between 28 May 2013 and 30 June 2014, 18,757 patients were admitted to the 20 ICUs, of which  
40 12,730 patients stayed at least 24 hours in the ICU. From these, 12,346 family members of 6380  
41 patients were recruited. Fully or partially completed questionnaires were returned by 7173 family  
42 members of 4615 patients. Family members of patients for whom no CMP data were available were  
43 not included, so finally, 7019 were included in the final analysis (Supplementary Figure S1).  
44  
45  
46  
47  
48

49 Response rates varied by family member characteristics, including; age, gender, ethnicity, level of  
50 deprivation (based on residential postcode), level of education, and relationship with the patient.  
51 Family members documented in ICU records as next-of-kin were more likely to complete the  
52 questionnaire than those who were not, whilst family members for whom English was their first  
53 language were more likely to complete the questionnaire than those for whom it was not (Table S2).  
54  
55  
56  
57

58 A detailed description of the inclusion process, response rates and responders' characteristics has  
59 been reported in Family Reported Experiences Evaluation (FREE) study (5). Comparisons of family  
60



member and patient characteristics for ICU survivors and non-survivors are presented in Table 1 and Table 2, respectively.

Table 1 Family member characteristics stratified by the patient's ICU outcome

| Family member characteristics                               | All Family members<br>[N=7,019] | Family members of<br>ICU survivors<br>[N=6,149] | Family members of ICU<br>non-survivors<br>[N=870] |
|-------------------------------------------------------------|---------------------------------|-------------------------------------------------|---------------------------------------------------|
| Age, mean (SD)                                              | 54 (15.1)                       | 54 (15.0)                                       | 52 (15.2)                                         |
| Age group, n (%)                                            |                                 |                                                 |                                                   |
| <30                                                         | 507 (7.5)                       | 439 (7.4)                                       | 68 (8.0)                                          |
| 30-39                                                       | 701 (10.3)                      | 595 (10.0)                                      | 106 (12.5)                                        |
| 40-49                                                       | 1,423 (21.0)                    | 1,245 (21.0)                                    | 178 (21.0)                                        |
| 50-59                                                       | 1,614 (23.8)                    | 1,406 (23.7)                                    | 208 (24.6)                                        |
| 60-69                                                       | 1,507 (22.2)                    | 1,334 (22.5)                                    | 173 (20.4)                                        |
| 70-79                                                       | 827 (12.2)                      | 747 (12.6)                                      | 80 (9.5)                                          |
| 80+                                                         | 204 (3.0)                       | 171 (2.9)                                       | 33 (3.9)                                          |
| Sex, n (%)                                                  |                                 |                                                 |                                                   |
| Male                                                        | 2,327 (33.5)                    | 2,052 (33.7)                                    | 275 (31.9)                                        |
| Female                                                      | 4,622 (66.5)                    | 4,034 (66.3)                                    | 588 (68.1)                                        |
| Ethnicity, n (%)                                            |                                 |                                                 |                                                   |
| White                                                       | 6,555 (94.0)                    | 5,738 (93.9)                                    | 817 (94.6)                                        |
| Asian                                                       | 138 (2.0)                       | 114 (1.9)                                       | 24 (2.8)                                          |
| Black                                                       | 54 (0.8)                        | 50 (0.8)                                        | 4 (0.5)                                           |
| Mixed ethnicity or other<br>ethnic group                    | 88 (1.3)                        | 84 (1.4)                                        | 4 (0.5)                                           |
| Not stated                                                  | 139 (2.0)                       | 124 (2.0)                                       | 15 (1.7)                                          |
| Relationship to patient, n (%) ("I<br>am the patient's...") |                                 |                                                 |                                                   |
| Partner                                                     | 2,096 (29.9)                    | 1,891 (30.8)                                    | 205 (23.6)                                        |
| Child                                                       | 654 (9.3)                       | 1,893 (30.8)                                    | 346 (39.8)                                        |
| Parent                                                      | 2,239 (31.9)                    | 622 (10.1)                                      | 32 (3.7)                                          |
| Sibling                                                     | 704 (10.0)                      | 624 (10.1)                                      | 80 (9.2)                                          |
| Other relative                                              | 969 (13.8)                      | 799 (13.0)                                      | 170 (19.5)                                        |
| Other non-relative                                          | 356 (5.1)                       | 319 (5.2)                                       | 37 (4.3)                                          |
| Next-of-kin, n (%)                                          | 3,520 (50.2)                    | 3,153 (51.4)                                    | 367 (42.3)                                        |
| Lives with patient, n (%)                                   | 2,559 (36.5)                    | 2,311 (37.6)                                    | 248 (28.5)                                        |
| Highest level of education, n (%)                           |                                 |                                                 |                                                   |
| NVQ level 1 or 2                                            | 1,683 (28.9)                    | 1,465 (28.9)                                    | 218 (29.1)                                        |
| NVQ level 3                                                 | 1,123 (19.3)                    | 989 (19.5)                                      | 134 (17.9)                                        |
| NVQ level 4 or 5                                            | 1,769 (30.4)                    | 1,537 (30.3)                                    | 232 (31.0)                                        |
| Other                                                       | 1,244 (21.4)                    | 1,080 (21.3)                                    | 164 (21.9)                                        |
| Quintile of deprivation, n (%)                              |                                 |                                                 |                                                   |
| 1 (least deprived)                                          | 1,190 (17.1)                    | 1,164 (19.9)                                    | 159 (19.4)                                        |
| 2                                                           | 1,405 (20.2)                    | 1,281 (21.9)                                    | 181 (22.1)                                        |
| 3                                                           | 1,488 (21.4)                    | 1,238 (21.1)                                    | 181 (22.1)                                        |

|                                                      |                         |              |            |
|------------------------------------------------------|-------------------------|--------------|------------|
| 4                                                    | 1,488 (21.4)            | 1,189 (20.3) | 169 (20.7) |
| 5 (most deprived)                                    | 1,391 (20.0)            | 989 (16.9)   | 128 (15.6) |
| Distance (km) from home to hospital, median (IQR)    | 12.4 (5.4 33.6) [6,714] | 12 (6, 34)   | 12 (5, 33) |
| Previous experience of ICU as a family member, n (%) | 1,841 (26.6)            | 1,641 (27.1) | 200 (23.3) |
| Frequent visitor, n (%)                              | 5,403 (78.9)            | 4,713 (78.6) | 690 (81.2) |

Table 2 Patient characteristics stratified by ICU outcome

| Patient characteristics                           | All patients<br>[N=4,506]                | ICU survivors<br>[N=4,007] | ICU non-survivors<br>[N=499] |
|---------------------------------------------------|------------------------------------------|----------------------------|------------------------------|
| Age, mean (SD)                                    | 63 (17.0)                                | 63 (17.3)                  | 68 (13.2)                    |
| Age group, n (%)                                  |                                          |                            |                              |
| <30                                               | 254 (5.6)                                | 246 (6.1)                  | 8 (1.6)                      |
| 30-39                                             | 232 (5.1)                                | 223 (5.6)                  | 9 (1.8)                      |
| 40-49                                             | 412 (9.1)                                | 384 (9.6)                  | 28 (5.6)                     |
| 50-59                                             | 643 (14.3)                               | 586 (14.6)                 | 57 (11.4)                    |
| 60-69                                             | 1,100 (24.4)                             | 966 (24.1)                 | 134 (26.9)                   |
| 70-79                                             | 1,159 (25.7)                             | 1,003 (25.0)               | 156 (31.3)                   |
| 80+                                               | 706 (15.7)                               | 599 (14.9)                 | 107 (21.4)                   |
| Sex, n (%)                                        |                                          |                            |                              |
| Male                                              | 2,561 (56.8)                             | 2,264 (56.5)               | 297 (59.5)                   |
| Female                                            | 1,945 (43.2)                             | 1,743 (43.5)               | 202 (40.5)                   |
| Ethnicity, n (%)                                  |                                          |                            |                              |
| White                                             | 4,176 (92.7)                             | 3,706 (92.5)               | 470 (94.2)                   |
| Asian or Asian British                            | 81 (1.8)                                 | 69 (1.7)                   | 12 (2.4)                     |
| Black or black British                            | 42 (0.9)                                 | 39 (1.0)                   | 3 (0.6)                      |
| Mixed ethnicity or other ethnic group             | 79 (1.8)                                 | 74 (1.8)                   | 5 (1.0)                      |
| Not stated                                        | 128 (2.8)                                | 119 (3.0)                  | 9 (1.8)                      |
| Quintile of deprivation, n (%)                    |                                          |                            |                              |
| 1 (least deprived)                                |                                          | 690 (17.4)                 | 84 (17)                      |
| 2                                                 |                                          | 812 (20.4)                 | 93 (18.8)                    |
| 3                                                 |                                          | 822 (20.7)                 | 106 (21.4)                   |
| 4                                                 |                                          | 841 (21.2)                 | 109 (22)                     |
| 5 (most deprived)                                 |                                          | 809 (20.4)                 | 103 (20.8)                   |
| Distance (km) from home to hospital, median (IQR) | 33.1 (67.8) 9.3<br>(4.3 19.9)<br>[4,475] | 10 (4, 20)                 | 8 (4, 16)                    |
| APACHE II severe co-morbidities, n (%)            |                                          |                            |                              |
| Liver                                             | 3,647 (80.9)                             | 94 (2.3)                   | 30 (6.0)                     |
| Renal                                             | 650 (14.4)                               | 97 (2.4)                   | 11 (2.2)                     |
| Respiratory                                       | 191 (4.2)                                | 119 (3.0)                  | 27 (5.4)                     |
| Cardiovascular                                    | 18 (0.4)                                 | 100 (2.5)                  | 17 (3.4)                     |

|                                                                                           |               |                |                 |
|-------------------------------------------------------------------------------------------|---------------|----------------|-----------------|
| Metastatic cancer                                                                         | 3,647 (80.9)  | 110 (2.7)      | 11 (2.2)        |
| Haematological malignancy                                                                 | 650 (14.4)    | 81 (2.0)       | 22 (4.4)        |
| Immunocompromise                                                                          | 191 (4.2)     | 318 (7.9)      | 51 (10.2)       |
| Prior dependency, n (%)                                                                   |               |                |                 |
| Able to live without assistance                                                           | 3,267 (72.5)  | 2,944 (73.5)   | 323 (64.7)      |
| Minor or major assistance                                                                 | 1,171 (26.0)  | 1,004 (25.1)   | 167 (33.5)      |
| Total assistance                                                                          | 47 (1.0)      | 42 (1.0)       | 5 (1.0)         |
| Unknown                                                                                   | 21 (0.5)      | 17 (0.4)       | 4 (0.8)         |
| Surgical status <i>n</i> (%)                                                              |               |                |                 |
| Non-surgical                                                                              | 2,808 (62.3)  | 2,396 (59.8)   | 412 (82.6)      |
| Planned admission following elective or scheduled surgery                                 | 702 (15.6)    | 686 (17.1)     | 16 (3.2)        |
| Unplanned admission following surgery of any urgency                                      | 996 (22.1)    | 925 (23.1)     | 71 (14.2)       |
| ICNARC Physiology Score, mean (SD)                                                        | 18 (8.3)      | 18 (7.9)       | 26 (8.1)        |
| APACHE II Score, mean (SD)                                                                | 17 (6.3)      | 16 (6.1)       | 21 (6.2)        |
| ICU length of stay (days), median (IQR)                                                   | 4.9 (2.9 9.1) | 4.8 (2.8, 9.0) | 6.0 (3.6, 10.6) |
| Organ support received in the ICU, n (%)                                                  |               |                |                 |
| Advanced respiratory support                                                              | 1,966 (43.6)  | 2,124 (53.0)   | 416 (83.4)      |
| Advanced cardiovascular support                                                           | 3,181 (70.6)  | 1,037 (25.9)   | 288 (57.7)      |
| Renal support                                                                             | 3,815 (84.7)  | 510 (12.7)     | 181 (36.3)      |
| Neurological support                                                                      | 3,889 (86.3)  | 503 (12.6)     | 114 (22.8)      |
| Duration (calendar days) of organ support among those receiving the support, median (IQR) |               |                |                 |
| Advanced respiratory support                                                              | 5.0 (2.0 9.0) | 4 (2, 9)       | 6 (4, 10)       |
| Advanced cardiovascular support                                                           | 3.0 (2.0 4.0) | 2 (2, 4)       | 3 (2, 5)        |
| Renal support                                                                             | 4.0 (3.0 8.0) | 4 (3, 8)       | 4 (3, 8)        |
| Neurological support                                                                      | 3.0 (2.0 7.0) | 3 (2, 7)       | 3 (2, 5)        |
| Death before acute hospital discharge, n (%)                                              | 852 (19.2)    | 353 (8.9)      | N/A             |

Both overall and individual domain scores revealed generally high satisfaction (Table 3), however a long tail was present indicating some questionnaires were returned with very low scores (Figure 1). Family members of ICU non-survivors had higher scores for overall satisfaction and satisfaction with the decision-making process domain than family members of ICU survivors.

Table 3 Overall family satisfaction score for all family members and for family members by patient outcome

| Summary measures                                                  | All family members<br>[N=7,017 <sup>a</sup> ] | Family members of ICU<br>survivors [N=6,147 <sup>a</sup> ] | Family members of<br>ICU non-survivors<br>[N=870] |
|-------------------------------------------------------------------|-----------------------------------------------|------------------------------------------------------------|---------------------------------------------------|
| Overall family satisfaction score                                 |                                               |                                                            |                                                   |
| <b>Median [IQR]</b>                                               | 83.3 [70.4, 93.0]                             | 82.7 [69.9, 92.7]                                          | 87.1 [74.4, 94.8]                                 |
| <b>Mean (SD)</b>                                                  | 79.7 (16.7)                                   | 79.3 (16.5)                                                | 82.0 (17.5)                                       |
| <b>[95% CI]</b>                                                   | [79.2 - 80.1]                                 | [78.9 - 79.8]                                              | [80.9 - 83.2]                                     |
| <i>Satisfaction with care domain score</i>                        |                                               |                                                            |                                                   |
| <b>Median [IQR]</b>                                               | 87.5 [74.3, 96.4]                             | 87.5 [73.6, 96.4]                                          | 88.1 [76.8, 96.4]                                 |
| <b>Mean (SD)</b>                                                  | 83.1 (16.0)                                   | 83.0 (15.9)                                                | 83.8 (16.9)                                       |
| <b>[95% CI]</b>                                                   | [82.7 - 83.4]                                 | [82.6 - 83.4]                                              | [82.7 - 84.9]                                     |
| <i>Satisfaction with information domain score</i>                 |                                               |                                                            |                                                   |
| <b>Median [IQR]</b>                                               | 79.2 [66.7, 95.8]                             | 79.2 [62.5, 95.8]                                          | 83.3 [70.8, 100.0]                                |
| <b>Mean (SD)</b>                                                  | 76.2 (22.0)                                   | 75.7 (22.0)                                                | 79.6 (22.9)                                       |
| <b>[95% CI]</b>                                                   | [75.7 - 76.7]                                 | [75.1 - 76.2]                                              | [78.1 - 81.0]                                     |
| <i>Satisfaction with the decision-making process domain score</i> |                                               |                                                            |                                                   |
| <b>Median [IQR]</b>                                               | 75.6 [59.3, 93.1]                             | 75.0 [57.5, 88.8]                                          | 87.5 [68.8, 100.0]                                |
| <b>Mean (SD)</b>                                                  | 73.1 (22.3)                                   | 72.1 (22.0)                                                | 79.6 (22.9)                                       |
| <b>[95% CI]</b>                                                   | [72.5 - 73.6]                                 | [71.6 - 72.7]                                              | [78.1 - 81.1]                                     |

<sup>a</sup> Two family members returned questionnaires but did not complete any of the 24 FS-ICU items – responses were not imputed for these family members.

Univariable analyses of the association between family satisfaction and family characteristics, patient characteristics, ICU/hospital characteristics and contextual factors are shown in the Supplementary Appendix (Table S3-S5). Family member level and patient level variables that were statistically significant along with the a priori key family member/patient variables (age, sex), were carried forward to the multivariable multilevel modelling process (5). There was no evidence of differences in family satisfaction according to hospital teaching status or the number of beds in the ICU, however, these variables were retained in the multilevel multivariable models due to their controlling effect on the other coefficients in the models. A summary of the candidate considered in the models and a justification of their inclusion/exclusion is detailed in Table S6.

Results of the multivariable multilevel models for overall family satisfaction are shown in Table 4. Among family members of ICU survivors, there was evidence of an independent association with overall family satisfaction for: family member age group; family member ethnicity; next-of-kin/lives with patient; frequency of visits; ICNARC Physiology Score; and receipt of advanced respiratory support. Among family members of non-survivors, only the following patient factors were significant: patient age; ICNARC Physiology Score; and ICU length of stay. A priori-specified interaction terms and random slopes did not improve the fit of the models and so these terms were not retained.

Table 4 Multivariable multilevel models for overall family satisfaction score

| Variables                                              | Family members of ICU survivors<br>[N=6,143 <sup>a</sup> ] |                |         | Family members of ICU non-survivors<br>[N=869 <sup>a</sup> ] |                |         |
|--------------------------------------------------------|------------------------------------------------------------|----------------|---------|--------------------------------------------------------------|----------------|---------|
|                                                        | Coef.                                                      | 95% CI         | p-value | Coef.                                                        | 95% CI         | p-value |
| Fixed effects – family member level                    |                                                            |                |         |                                                              |                |         |
| Constant                                               | 68.30                                                      | (63.42, 73.17) | <0.001  | 55.70                                                        | (42.26, 69.14) | <0.001  |
| Family member age, years (vs <30)                      |                                                            |                | 0.041   |                                                              |                | 0.18    |
| 30-39                                                  | 1.97                                                       | (0.11, 3.82)   |         | 2.01                                                         | (-2.64, 6.66)  |         |
| 40-49                                                  | 1.65                                                       | (0.02, 3.29)   |         | 3.37                                                         | (-1.01, 7.75)  |         |
| 50-59                                                  | 1.96                                                       | (0.35, 3.56)   |         | 4.12                                                         | (-0.09, 8.33)  |         |
| 60-69                                                  | 1.35                                                       | (-0.31, 3.01)  |         | 4.26                                                         | (-0.25, 8.79)  |         |
| 70-79                                                  | 1.32                                                       | (-0.52, 3.17)  |         | 5.92                                                         | (0.69, 11.14)  |         |
| 80+                                                    | -1.34                                                      | (-4.06, 1.37)  |         | -0.18                                                        | (-6.80, 6.43)  |         |
| Family member sex – female (vs male)                   | 0.32                                                       | (-0.48, 1.12)  | 0.44    | 0.66                                                         | (-1.45, 2.77)  | 0.54    |
| Family member ethnicity – white (vs non-white)         | 3.59                                                       | (1.38, 5.80)   | 0.001   | 7.12                                                         | (-0.00, 14.25) | 0.050   |
| Next-of-kin/lives with patient (vs lives with patient) |                                                            |                | <0.001  |                                                              |                | 0.26    |
| Next-of-kin, does not live with patient                | -1.39                                                      | (-2.56, -0.22) |         | 1.08                                                         | (-2.39, 4.55)  |         |
| Not next-of-kin, does not live with patient            | -2.33                                                      | (-3.26, -1.41) |         | -1.24                                                        | (-3.88, 1.40)  |         |
| Frequent visitor                                       | 2.83                                                       | (1.82, 3.84)   | <0.001  | 1.53                                                         | (-1.34, 4.39)  | 0.30    |
| Fixed effects – patient level                          |                                                            |                |         |                                                              |                |         |
| Patient age (per 10 years)                             | 0.01                                                       | (-0.28, 0.31)  | 0.93    | 1.18                                                         | (0.09, 2.27)   | 0.033   |
| Patient sex – female (vs male)                         | 0.26                                                       | (-0.73, 1.25)  | 0.61    | 1.92                                                         | (-0.85, 4.70)  | 0.17    |
| Dependency (vs none)                                   |                                                            |                | 0.15    |                                                              |                | 0.74    |
| Minor or major                                         | -0.30                                                      | (-1.60, 1.00)  |         | -0.22                                                        | (-3.36, 2.92)  |         |
| Total                                                  | -4.62                                                      | (-9.32, 0.07)  |         | 4.98                                                         | (-8.10, 18.07) |         |

|                                        |                     |        |                      |  |        |
|----------------------------------------|---------------------|--------|----------------------|--|--------|
| Surgical status (vs non-surgical)      |                     |        | 0.63                 |  | 0.82   |
| Planned elective/scheduled             | -0.74 (-2.24, 0.77) |        | -2.61 (-10.77, 5.54) |  |        |
| Unplanned                              | -0.26 (-1.46, 0.94) |        | -0.08 (-3.95, 3.80)  |  |        |
| ICNARC Physiology Score (per point)    | 0.16 (0.09, 0.24)   | <0.001 | 0.17 (0.00, 0.34)    |  | 0.045  |
| ICU length of stay (per day)           | -0.02 (-0.07, 0.03) | 0.44   | -0.30 (-0.46, -0.15) |  | <0.001 |
| Advanced respiratory support           | 2.96 (1.80, 4.11)   | <0.001 | ---                  |  |        |
| Fixed effects – ICU/hospital level     |                     |        |                      |  |        |
| Hospital type (vs non-university)      |                     |        | 0.49                 |  | 0.55   |
| University                             | 0.86 (-3.61, 5.32)  |        | -1.51 (-7.51, 4.50)  |  |        |
| University affiliated                  | 1.97 (-1.26, 5.20)  |        | 1.77 (-2.55, 6.09)   |  |        |
| Number of ICU beds (per bed)           | -0.00 (-0.23, 0.23) | 0.97   | 0.26 (-0.08, 0.61)   |  | 0.13   |
| Random effects – SD (SE)               |                     |        |                      |  |        |
| Between ICUs                           | 2.91 (0.60)         |        | 2.81 (1.10)          |  |        |
| Within ICUs between patients           | 10.94 (0.29)        |        | 11.16 (0.69)         |  |        |
| Within patients between family members | 11.98 (0.21)        |        | 12.26 (0.44)         |  |        |
| Variance partition – percentage        |                     |        |                      |  |        |
| Between ICUs                           | 3%                  |        | 2%                   |  |        |
| Between patients                       | 44%                 |        | 44%                  |  |        |

Coef, coefficient; SE, standard error.

<sup>a</sup>Five patients were missing age group on both the questionnaire and web portal – due to the very small amount of missing data in this key variable, these missing values were not imputed.

Variances at both the patient and ICU/hospital levels were statistically significant but the variance partition coefficients (VPCs) at the ICU/hospital level were small in both the null and final multilevel models (4% and 3% for ICU survivors and 2% and 2% for ICU non-survivors, respectively), which means differences in overall family satisfaction scores were mainly at the patient and family member levels. Variance at the patient level represented 44% of the total variance in overall family satisfaction in the final models for family members of both ICU survivors and ICU non-survivors.

Full results of the multivariable multilevel models for the domain scores are reported in the Supplementary Appendix (Table S7-S9).

Figure 2 shows the funnel plots for the overall family satisfaction score, before and after adjustment for family member and patient characteristics from the multivariable multilevel models. Adjusting for family member and patient characteristics reduced the variability across ICUs, resulting in fewer

1  
2  
3 ICUs outside the funnel plot control limits. Funnel plots for the individual domain scores before and  
4 after adjustment for can be found in the Supplementary Appendix (Figure S2).  
5  
6

### 7 **Sensitivity analyses**

8  
9 For the multivariable multilevel modelling the direction and order of magnitude of coefficients that  
10 were significant in the models estimated using imputed data were similar to those estimated using  
11 the traditional approach to scoring partially completed questionnaires (Supplementary Appendix,  
12 Table S10 and Table S11). On average, the multiple imputation approach tended to identify larger  
13 numbers of potential outliers due to the larger sample sizes and therefore narrower funnels.  
14  
15  
16  
17  
18  
19  
20

### 21 **Discussion**

22  
23 Overall and domain specific family satisfaction measured with the UK FS-ICU-24 was high. However,  
24 we found that it varies significantly across adult general ICUs and that family members of patients  
25 who died in the ICU had higher levels of satisfaction. For family members of ICU survivors,  
26 characteristics of both family member and the patient were significant determinants of family  
27 satisfaction, whereas, for family members of ICU non-survivors, only patient characteristics were  
28 significant. Adjustment for these family member and patient characteristics reduced the variation in  
29 family satisfaction across ICUs, resulting in fewer ICUs being identified as outliers.  
30  
31  
32  
33  
34  
35

36 The overall satisfaction score was comparable with other published studies employing similar  
37 methods to administer the FS-ICU-24 (10-13). Our findings are also consistent with a study by Wall et  
38 al (14) which identified that families of ICU non-survivors were more satisfied than families of ICU  
39 survivors. Similarly, Stricker et al (15) found that increasing acute severity of illness of the patient  
40 (evaluated using the SAPS II score) was associated with increasing satisfaction on the overall family  
41 satisfaction score, however, lower satisfaction was associated with ICU-level characteristics of a  
42 written admission/discharge policy and a higher patient:nurse ratio. Other considered patient  
43 characteristics were found not to be significant.  
44  
45  
46  
47  
48  
49

50 Our work has several important strengths. To our knowledge, this is the largest study assessing  
51 family satisfaction with ICU care. Nesting our study within the national clinical audit programme was  
52 efficient and novel and allowed for unbiased selection and stratification of participating units and  
53 linkage of family members' to patient data. One important strength is that the same mode and  
54 timing of delivery of the FS-ICU-24 was employed for family members of ICU survivors and non-  
55 survivors, avoiding potential sampling bias and allowing for meaningful comparisons between these  
56 groups. Finally, the large sample size of family members allowed for robust multilevel multivariable  
57  
58  
59  
60

1  
2  
3 modelling of factors associated with overall family satisfaction to inform important adjustment of  
4 any future assessment using this questionnaire. Despite our very large sample size, we achieved a  
5 modest response rate (58%), however this was similar to other studies with smaller sample sizes (10,  
6  
7 14).

8  
9  
10 In conclusion, this large, prospective, multicentre cohort study indicated that overall family  
11 satisfaction with adult general ICU care in the UK was high. However, adjustment for differences in  
12 family member/patient characteristics are important to avoid falsely identifying ICUs as outliers.  
13  
14  
15  
16  
17  
18  
19  
20  
21  
22  
23  
24  
25  
26  
27  
28  
29  
30  
31  
32  
33  
34  
35  
36  
37  
38  
39  
40  
41  
42  
43  
44  
45  
46  
47  
48  
49  
50  
51  
52  
53  
54  
55  
56  
57  
58  
59  
60

For peer review only



## Acknowledgements

We wish to thank the NIHR Health Services and Delivery Research programme for funding this project. We also wish to thank all the patients, family members and staff from all the units that participated the study.

### Research staff at sites

C Smalley and R Jacob (Arrowe Park Hospital); S Chau, S A Pearson, K Ellis and R Watmough (Barnsley Hospital); M Faulkner, L Evans and H Robertson (Countess of Chester Hospital); P Wakefield, R Abrahams, N Summers and H Wooldridge (Darent Valley Hospital); H McMillan, S Tyson, K Tantam, S Olver, C Brown and C Tippet (Derriford Hospital); S Moreton, S Jones, A Deeney, J Gibbins and A Oglesby (Dorset County Hospital); C Randell, M Allsop, K Harris, C Scott and C Boyd (Freeman Hospital); E Coughlan, A Jefferies and K Wylie (Manchester Royal Infirmary); C Plowright, C Pegg, L Cooper and T Hatton (Medway Maritime Hospital); P Doble, P Richards, D Bayford and K Adams (Musgrove Park Hospital); J Spimpolo, M Burt and R Pillai (Northampton General Hospital); K A Simeson and S Buckley (Pinderfields Hospital); A Jackson, M Nadolski and H Baker (Royal Devon & Exeter Hospital, Wonford); N Mason, U Gunter and L Roberts (Royal Gwent Hospital); T Evans, E Cooke, M Ogden and P Dark (Salford Royal Hospital); M Cody, F Hogg and D McCahery (South West Acute Hospital); D Dawson, J Mellinghoff, S Prudden, N Poonuth and C Ryan (St George's Hospital); G Mandersloot, A Smith (The Royal London Hospital); S Hagan, L Humphries and E Murphy (Ulster Hospital); E Walker, H Payne and X Zhao (Watford General Hospital); C Edmondson, S Anglesea and H Williams (Wrexham Maelor Hospital).

### Study Steering Committee

Dr Kathleen Daly (independent chair); Andrina Colquoun (independent); Dr Maureen Dalziel; Kirsty Everingham (independent); Doreen Henry (independent); Joan Pearson (independent); Catherine Plowright; Dr Laura Price (independent); Professor Kathryn Rowan; Professor Mervyn Singer (independent); and Dr Stephen Wright.

**Funding:** This project was funded by the National Institute for Health Research (NIHR) Health Services and Delivery Research (HS&DR) Programme (11/2003/56). The funder had no involvement in study design; in collection, analysis and interpretation of data; in the writing of the report; or in the decision to submit the article for publication. The views and opinions expressed therein are those of the authors and do not necessarily reflect those of the HS&DR Programme, NIHR, NHS or the Department of Health.

1  
2  
3 **Competing interests:** Kathryn M Rowan is a member of the NIHR HS&DR Board. Elaine McColl was  
4 an editor for the NIHR Journals Library between 2013 and 2016 and received a fee for this work. The  
5 other authors declare no conflicts of interest. All authors have completed the Unified Competing  
6 Interest form (available on request from the corresponding author).  
7  
8  
9

10 **Data sharing:** data can be obtained from the corresponding author on request  
11  
12

13 **Authors contributions:** KMR as Chief Investigator conceived the idea and designed the study with  
14 DAH, SHE, DKH, LH, EMc, MR, and SEW. EW co-ordinated the study and contributed to data  
15 acquisition with ARB, RRC, SHE, and SEW. PVP, DWG, DAH, SHE, DKH, LH, EMc, MR, SEW, and KMR  
16 were involved in the analysis and interpretation of the results. All authors were involved in the  
17 drafting, editing and have approved the final manuscript.  
18  
19  
20  
21  
22  
23  
24  
25  
26  
27  
28  
29  
30  
31  
32  
33  
34  
35  
36  
37  
38  
39  
40  
41  
42  
43  
44  
45  
46  
47  
48  
49  
50  
51  
52  
53  
54  
55  
56  
57  
58  
59  
60

## References

1. Black N, Jenkinson C. Measuring patients' experiences and outcomes. *BMJ*. 2009;339:b2495.
2. Heyland DK, Tranmer JE. Measuring family satisfaction with care in the intensive care unit: the development of a questionnaire and preliminary results. *J Crit Care*. 2001;16(4):142-9.
3. Rothen HU, Stricker KH, Heyland DK. Family satisfaction with critical care: measurements and messages. *Curr Opin Crit Care*. 2010;16(6):623-31.
4. Wall RJ, Engelberg RA, Downey L, Heyland DK, Curtis JR. Refinement, scoring, and validation of the Family Satisfaction in the Intensive Care Unit (FS-ICU) survey. *Crit Care Med*. 2007;35(1):271-9.
5. Wright SE, Walmsley E, Harvey SE, Robinson E, Ferrando-Vivas P, Harrison DA, et al. Family-Reported Experiences Evaluation (FREE) study: a mixed-methods study to evaluate families' satisfaction with adult critical care services in the NHS. *Health Serv Deliv Res*. 2015;3(45).
6. DA H, P F-V, SE W, E M, DK H, KM R. Psychometric assessment of the Family Satisfaction in the Intensive Care Unit questionnaire in the United Kingdom. *J Crit Care*. 2017;38:346-50.
7. Snijders TAB, Bosker RJ. *Multilevel Analysis: An Introduction to Basic and Advanced Multilevel Modeling*. Thousand Oaks, CA: SAGE Publications; 1999.
8. Spiegelhalter DJ. Funnel plots for comparing institutional performance. *Stat Med*. 2005;24(8):1185-202.
9. Carpenter JR, Goldstein H, Kenward MG. REALCOM-IMPUTE software for multilevel multiple imputation with mixed response types. *Journal of Statistical Software*. 2011;45:5.
10. Dodek PM, Wong H, Heyland DK, Cook DJ, Rocker GM, Kutsogiannis DJ, et al. The relationship between organizational culture and family satisfaction in critical care. *Crit Care Med*. 2012;40(5):1506-12.
11. Khalaila R. Patients' family satisfaction with needs met at the medical intensive care unit. *Journal of Advanced Nursing*. 2013(69):1172-82.
12. Schwarzkopf D, Behrend S, Skupin H, Westermann I, Riedemann NC, Pfeifer R, et al. Family satisfaction in the intensive care unit: a quantitative and qualitative analysis. *Intensive Care Med*. 2013;39(6):1071-9.
13. Tastan S, Iyigun E, Ayhan H, Kilickaya O, Yilmaz AA, Kurt E. Validity and reliability of Turkish version of family satisfaction in the intensive care unit. *Int J Nurs Pract*. 2014;20(3):320-6.
14. Wall RJ, Curtis JR, Cooke CR, Engelberg RA. Family satisfaction in the ICU: differences between families of survivors and nonsurvivors. *Chest*. 2007;132(5):1425-33.
15. Stricker KH, Kimberger O, Schmidlin K, Zwahlen M, Mohr U, Rothen HU. Family satisfaction in the intensive care unit: what makes the difference? *Intensive Care Med*. 2009;35(12):2051-9.

1  
2  
3 **Figure legends**  
4

5 Figure 1 Distribution of overall family satisfaction score  
6

7 Figure 2 Variation across ICUs in the mean overall family satisfaction score (A) before and (B) after  
8 adjustment for patient and family member characteristics  
9  
10  
11  
12  
13  
14  
15  
16  
17  
18  
19  
20  
21  
22  
23  
24  
25  
26  
27  
28  
29  
30  
31  
32  
33  
34  
35  
36  
37  
38  
39  
40  
41  
42  
43  
44  
45  
46  
47  
48  
49  
50  
51  
52  
53  
54  
55  
56  
57  
58  
59  
60

For peer review only

1  
2  
3  
4  
5  
6  
7  
8  
9  
10  
11  
12  
13  
14  
15  
16  
17  
18  
19  
20  
21  
22  
23  
24  
25  
26  
27  
28  
29  
30  
31  
32  
33  
34  
35  
36  
37  
38  
39  
40  
41  
42  
43  
44  
45  
46  
47  
48  
49  
50  
51  
52  
53  
54  
55  
56  
57  
58  
59  
60

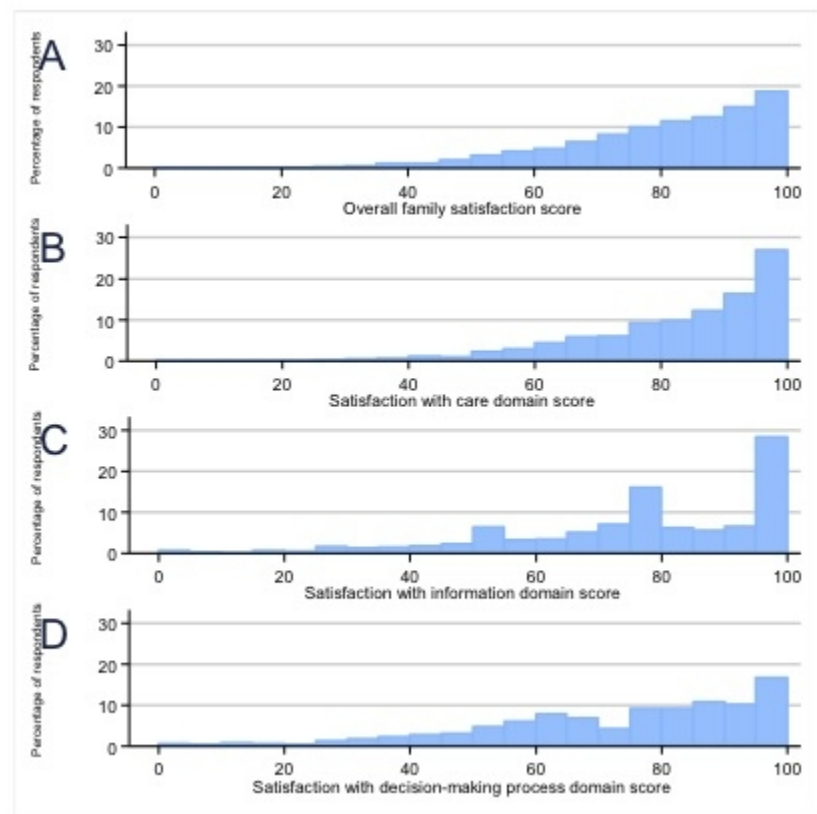

Figure 1 Distribution of overall family satisfaction score

145x145mm (72 x 72 DPI)

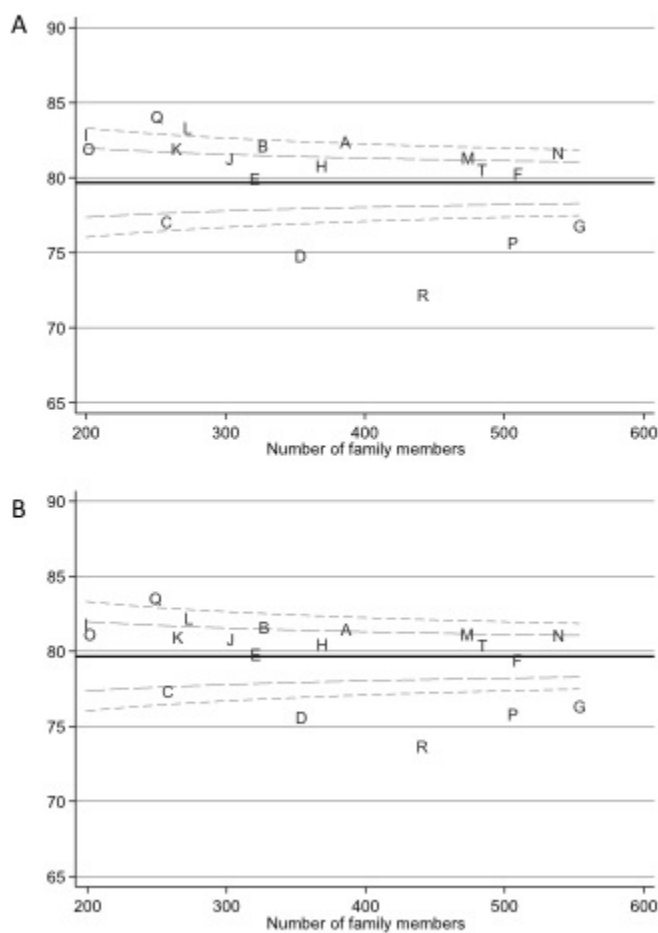

Figure 2 Variation across ICUs in the mean overall family satisfaction score (A) before and (B) after adjustment for patient and family member characteristics

120x172mm (72 x 72 DPI)

1  
2  
3 **Supplementary material**  
4

5 Family satisfaction with critical care in the United Kingdom: a multi-centre  
6 cohort study  
7  
8  
9

10  
11  
12  
13  
14  
15  
16  
17  
18  
19  
20  
21  
22  
23  
24  
25  
26  
27  
28  
29  
30  
31  
32  
33  
34  
35  
36  
37  
38  
39  
40  
41  
42  
43  
44  
45  
46  
47  
48  
49  
50  
51  
52  
53  
54  
55  
56  
57  
58  
59  
60

For peer review only

**Table S1** Characteristics and outcomes for all admission to ICUs participating in the FREE study and ICNARC Case Mix Programme

|                                                                     | <b>CMP</b>                              | <b>FREE study</b>                      |
|---------------------------------------------------------------------|-----------------------------------------|----------------------------------------|
| Total number of ICUs [N]                                            | [209] <sup>a</sup>                      | [19] <sup>a</sup>                      |
| Total number of admissions [N]                                      | [149,779]                               | [18,270]                               |
| Age <i>mean</i> (SD)                                                | 61.5 (18.0)                             | 61.5 (18.0)                            |
| Sex <i>male</i> (%)                                                 | 82,444 (55.0)                           | 10,316 (56.5)                          |
| Ethnicity <i>n</i> (%)                                              |                                         |                                        |
| White                                                               | 135,767 (90.6)                          | 16,439 (90.0)                          |
| Asian                                                               | 4,815 (3.2)                             | 439 (2.4)                              |
| Black                                                               | 3,250 (2.2)                             | 327 (1.8)                              |
| Other                                                               | 2,434 (1.6)                             | 445 (2.4)                              |
| Not stated                                                          | 3,513 (2.3)                             | 620 (3.4)                              |
| Distance (km) from patient home to hospital <i>median</i> (IQR) [N] | 25.0 (54.2) 8.7 (3.9 19.3)<br>[128,169] | 31.7 (64.5) 9.2 (4.2 20.8)<br>[18,090] |
| APACHE II severe co-morbidities <i>n</i> (%)                        |                                         |                                        |
| 0                                                                   | 123,437 (82.4)                          | 14,742 (80.7)                          |
| 1                                                                   | 20,906 (14.0)                           | 2,648 (14.5)                           |
| 2                                                                   | 5,053 (3.4)                             | 793 (4.3)                              |
| 3 or more                                                           | 383 (0.3)                               | 87 (0.5)                               |
| Admission type <i>n</i> (%) [N]                                     | [149,765]                               | [18,270]                               |
| Medical                                                             | 87,940 (58.7)                           | 10,039 (54.9)                          |
| Elective surgery                                                    | 34,284 (22.9)                           | 4,761 (26.1)                           |
| Emergency surgery                                                   | 27,541 (18.4)                           | 3,470 (19.0)                           |
| Surgical status of surgical admissions <i>n</i> (%) [N]             | [61,825]                                | [8,231]                                |
| Planned surgery                                                     | 28,267 (45.7)                           | 3,985 (48.4)                           |
| Unplanned surgery                                                   | 33,558 (54.3)                           | 4,246 (51.6)                           |
| ICNARC Physiology Score <i>mean</i> (SD)                            | 16.9 (9.3)                              | 16.5 (9.2)                             |
| ICNARC predicted risk of death <i>median</i> (IQR) [N]              | 0.10 (0.03 0.33)<br>[142,654]           | 0.09 (0.03 0.30) [17,261]              |
| APACHE II Acute Physiology Score <i>mean</i> (SD)                   | 11.4 (6.1)                              | 11.3 (5.9)                             |
| APACHE II Score <i>mean</i> (SD)                                    | 15.7 (7.0)                              | 15.6 (6.9)                             |
| APACHE II predicted risk of death <i>median</i> (IQR) [N]           | 0.12 (0.04 0.29)<br>[132,197]           | 0.11 (0.04 0.28) [16,193]              |
| Mechanical ventilation during first 24 hrs <i>n</i> (%) [N]         | 58,687 (39.4) [148,975]                 | 7,008 (38.5) [18,187]                  |



1  
2  
3  
4  
5  
6  
7  
8  
9  
10  
11  
12  
13  
14  
15  
16  
17  
18  
19  
20  
21  
22  
23  
24  
25  
26  
27  
28  
29  
30  
31  
32  
33  
34  
35  
36  
37  
38  
39  
40  
41  
42  
43  
44  
45  
46  
47  
48  
49  
50  
51  
52  
53  
54  
55  
56  
57  
58  
59  
60

|                                           |                         |                       |
|-------------------------------------------|-------------------------|-----------------------|
| ICU mortality <i>n</i> (%) [N]            | 21,505 (14.4) [149,779] | 2,560 (14.0) [18,270] |
| Acute hospital mortality <i>n</i> (%) [N] | 29,945 (21.0) [142,670] | 3,550 (20.6) [17,266] |

<sup>a</sup> excludes one ICU for which no CMP data were available

For peer review only

**Figure S1** Overview of patients, family members and questionnaires (distributed/returned)

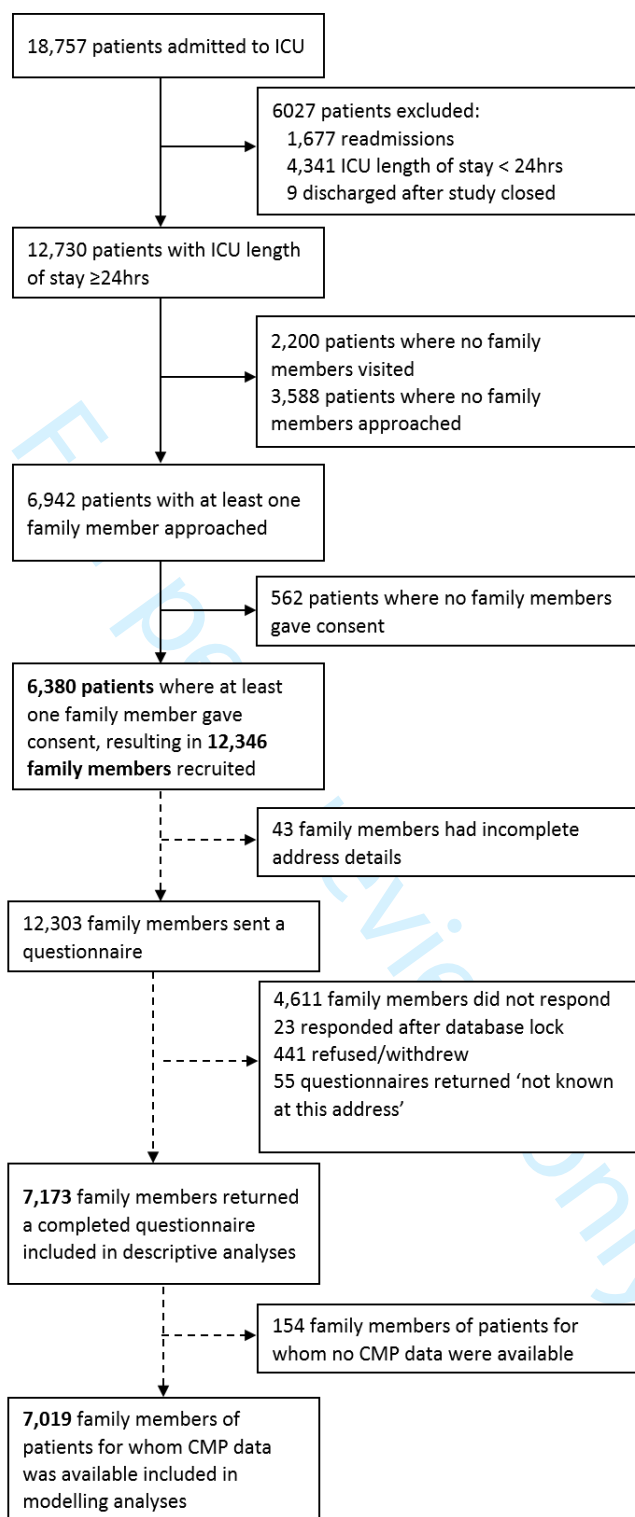

**Key**  
 Recruitment in ICU ———>  
 Postal survey - - - - ->

**Table S2** Characteristics of all recruited family members and by response to questionnaire

|                                                                            | <b>All recruited family members</b> | <b>Those returning questionnaires</b> | <b>Did not respond</b>    |
|----------------------------------------------------------------------------|-------------------------------------|---------------------------------------|---------------------------|
| Total number of family members, N                                          | 12 346                              | 7173                                  | 4611                      |
| Age group, <i>n</i> (%) [N]                                                | [12 068]                            | [7019]                                | [4500]                    |
| <30                                                                        | 1429 (11.8)                         | 530 (7.6)                             | 861 (19.1)                |
| 30-39                                                                      | 1590 (13.2)                         | 721 (10.3)                            | 827 (18.4)                |
| 40-49                                                                      | 2760 (22.9)                         | 1465 (20.9)                           | 1208 (26.9)               |
| 50-59                                                                      | 2646 (21.9)                         | 1654 (23.6)                           | 886 (19.7)                |
| 60-69                                                                      | 2131 (17.7)                         | 1580 (22.5)                           | 440 (9.8)                 |
| 70-79                                                                      | 1211 (10.0)                         | 862 (12.3)                            | 220 (4.8)                 |
| 80+                                                                        | 301 (2.5)                           | 207 (2.9)                             | 58 (1.3)                  |
| Sex, <i>n</i> (%) [N]                                                      | [12 145]                            | [7062]                                | [4529]                    |
| Female                                                                     | 7687 (63.3)                         | 4689 (66.4)                           | 2663 (58.8)               |
| Male                                                                       | 4458 (36.7)                         | 2373 (33.6)                           | 1866 (41.2)               |
| Ethnicity, <i>n</i> (%) [N]                                                | [12 090]                            | [7033]                                | [4505]                    |
| White                                                                      | 11 379 (94.1)                       | 6747 (95.9)                           | 4111 (91.3)               |
| Asian                                                                      | 355 (2.9)                           | 142 (2.0)                             | 196 (4.4)                 |
| Black                                                                      | 161 (1.3)                           | 55 (0.8)                              | 101 (2.2)                 |
| Other                                                                      | 195 (1.6)                           | 89 (1.3)                              | 97 (2.1)                  |
| Deprivation, <i>n</i> (%) [N]                                              | [11 740]                            | [6832]                                | [4370]                    |
| 1 [least deprived]                                                         | 2113 (18.0)                         | 1376 (20.1)                           | 634 (14.5)                |
| 2                                                                          | 2406 (20.5)                         | 1502 (22.0)                           | 803 (18.4)                |
| 3                                                                          | 2415 (20.6)                         | 1443 (21.1)                           | 851 (19.5)                |
| 4                                                                          | 2545 (21.7)                         | 1380 (20.2)                           | 1045 (23.9)               |
| 5 [most deprived]                                                          | 2261 (19.3)                         | 1131 (16.6)                           | 1037 (23.7)               |
| Distance (km) from family member home to hospital, <i>median</i> (IQR) [N] | 11.6 (5.1-30.7)<br>[11 803]         | 12.3 (5.3-33.2)<br>[6867]             | 10.7 (4.6-29.4)<br>[4394] |
| Relationship, <i>n</i> (%) [N] "I am the patient's..."                     | [12 343]                            | [7173]                                | [4611]                    |
| Partner                                                                    | 3105 (25.2)                         | 2151 (30.0)                           | 786 (17.0)                |
| Child                                                                      | 4186 (33.9)                         | 2292 (32.0)                           | 1780 (38.6)               |
| Parent                                                                     | 1054 (8.5)                          | 665 (9.3)                             | 338 (7.3)                 |
| Sibling                                                                    | 1271 (10.3)                         | 717 (10.0)                            | 480 (10.4)                |
| Other relative                                                             | 1973 (16.0)                         | 987 (13.8)                            | 898 (19.5)                |
| Other non-relative                                                         | 754 (6.1)                           | 361 (5.0)                             | 329 (7.1)                 |
| Next-of-kin, <i>n</i> (%) [N]                                              | [11 702]                            | [6770]                                | [4389]                    |
| No                                                                         | 7086 (60.6)                         | 3747 (55.3)                           | 3009 (68.6)               |
| Yes                                                                        | 4616 (39.4)                         | 3023 (44.7)                           | 1380 (31.4)               |
| Lives with patient, <i>n</i> (%) [N]                                       | [12 343]                            | [7172]                                | [4609]                    |
| No                                                                         | 8255 (66.9)                         | 4543 (63.3)                           | 3357 (72.8)               |
| Yes                                                                        | 4088 (33.1)                         | 2629 (36.7)                           | 1252 (27.2)               |
| Education level, <i>n</i> (%) [N]                                          | [10 293]                            | [5971]                                | [3888]                    |
| NVQ 1 or 2                                                                 | 3147 (30.6)                         | 1731 (29.0)                           | 1284 (33.0)               |
| NVQ 3                                                                      | 2086 (20.3)                         | 1149 (19.2)                           | 870 (22.4)                |

|                                  |               |              |             |
|----------------------------------|---------------|--------------|-------------|
| NVQ 4 or 5                       | 2936 (28.5)   | 1819 (30.5)  | 1032 (26.5) |
| Other                            | 2124 (20.6)   | 1272 (21.3)  | 702 (18.1)  |
| <hr/>                            |               |              |             |
| First language, <i>n</i> (%) [N] | [12 346]      | [7 173]      | [4611]      |
| Not English                      | 335 (2.7)     | 140 (2.0)    | 182 (3.9)   |
| English                          | 12 011 (97.3) | 7 033 (98.0) | 4429 (96.1) |
| <hr/>                            |               |              |             |

For peer review only

**Table S3** Univariable analyses of factors associated with overall family satisfaction score by ICU outcome – family member characteristics

| Variables                                      | Family members of ICU survivors [N=6,147 <sup>a</sup> ] |                |         | Family members of ICU non-survivors [N=870] |                 |         |
|------------------------------------------------|---------------------------------------------------------|----------------|---------|---------------------------------------------|-----------------|---------|
|                                                | Coef.                                                   | 95% CI         | p-value | Coef.                                       | 95% CI          | p-value |
| Age, years (vs < 30)                           |                                                         |                | 0.031   |                                             |                 | 0.033   |
| 30-39                                          | 1.56                                                    | (-0.22, 3.33)  |         | 2.68                                        | (-1.80, 7.17)   |         |
| 40-49                                          | 0.42                                                    | (-0.10, 0.94)  |         | 1.61                                        | (0.21, 3.01)    |         |
| 50-59                                          | 2.12                                                    | (0.61, 3.64)   |         | 5.49                                        | (1.49, 9.50)    |         |
| 60-69                                          | 1.96                                                    | (0.39, 3.52)   |         | 6.01                                        | (1.78, 10.25)   |         |
| 70-79                                          | 1.98                                                    | (0.28, 3.68)   |         | 7.39                                        | (2.58, 12.19)   |         |
| 80+                                            | -0.55                                                   | (-3.05, 1.95)  |         | 2.62                                        | (-3.48, 8.73)   |         |
| Female (vs male)                               | 0.40                                                    | (-0.34, 1.14)  | 0.29    | 0.44                                        | (-1.59, 2.47)   | 0.67    |
| White ethnicity (vs non-white)                 | 3.60                                                    | (1.46, 5.75)   | 0.001   | 8.78                                        | (1.85, 15.70)   | 0.013   |
| Relationship (vs partner)                      |                                                         |                | <0.001  |                                             |                 | 0.28    |
| Parent                                         | 0.00                                                    | (-1.39, 1.39)  |         | 0.08                                        | (-5.73, 5.90)   |         |
| Child                                          | -0.94                                                   | (-1.83, -0.05) |         | -1.274                                      | (-3.69, 1.14)   |         |
| Sibling                                        | -2.16                                                   | (-3.50, -0.82) |         | 0.909                                       | (-3.02, 4.84)   |         |
| Other-relative                                 | -1.63                                                   | (-2.81, -0.44) |         | -0.619                                      | (-3.60, 2.36)   |         |
| Other-non relative                             | -3.42                                                   | (-5.22, -1.62) |         | -6.134                                      | (-11.69, -0.58) |         |
| Next of kin                                    | 1.74                                                    | (1.05, 2.44)   | <0.001  | 2.69                                        | (0.78, 4.59)    | 0.006   |
| Lives with patient                             | 1.95                                                    | (1.20, 2.69)   | <0.001  | 1.15                                        | (-0.99, 3.29)   | 0.29    |
| Education (vs NVQ 1 or 2)                      |                                                         |                | <0.001  |                                             |                 | 0.16    |
| NVQ 3                                          | -0.60                                                   | (-1.77, 0.57)  |         | 1.14                                        | (-2.09, 4.37)   |         |
| NVQ 4 or 5                                     | -2.43                                                   | (-3.49, -1.37) |         | -2.07                                       | (-4.92, 0.77)   |         |
| Other                                          | -0.18                                                   | (-1.35, 0.98)  |         | -1.75                                       | (-4.73, 1.24)   |         |
| Quintile of deprivation (vs 1, least deprived) |                                                         |                | 0.63    |                                             |                 | 0.77    |
| 2                                              | 0.49                                                    | (-0.74, 1.72)  |         | 0.64                                        | (-2.73, 4.01)   |         |
| 3                                              | 0.96                                                    | (-0.29, 2.20)  |         | 0.84                                        | (-2.59, 4.26)   |         |
| 4                                              | 0.32                                                    | (-0.97, 1.60)  |         | -1.07                                       | (-4.59, 2.44)   |         |
| 5 (most deprived)                              | 0.67                                                    | (-0.70, 2.05)  |         | 0.79                                        | (-3.10, 4.69)   |         |
| Distance from home to hospital (per 10 km)     | -0.05                                                   | (-0.11, 0.01)  | 0.12    | 0.05                                        | (-0.09, 0.18)   | 0.49    |
| Previous experience of ICU as a family member  | 0.25                                                    | (-0.63, 1.14)  | 0.58    | -0.68                                       | (-3.22, 1.87)   | 0.60    |
| Frequent visitor                               | 2.52                                                    | (1.63, 3.41)   | <0.001  | 2.91                                        | (0.36, 5.47)    | 0.030   |

Coef., coefficient.

<sup>a</sup> Two family members returned questionnaires but did not complete any of the 24 FS-ICU items – responses were not imputed for these family members.

**Table S4** Univariable analyses of factors associated with overall family satisfaction score by ICU outcome – patient characteristics

| Variables                                         | Family members of ICU survivors [N=6,147 <sup>a</sup> ] |                |         | Family members of ICU non-survivors [N=870] |                 |         |
|---------------------------------------------------|---------------------------------------------------------|----------------|---------|---------------------------------------------|-----------------|---------|
|                                                   | Coef.                                                   | 95% CI         | p-value | Coef.                                       | 95% CI          | p-value |
| Age (per 10 years)                                | -0.09                                                   | (-0.36, 0.17)  | 0.49    | 1.12                                        | (0.11, 2.14)    | 0.030   |
| Female (vs male)                                  | 0.67                                                    | (-0.25, 1.59)  | 0.16    | 2.04                                        | (-0.66, 4.74)   | 0.14    |
| White ethnicity (vs non-white)                    | 2.39                                                    | (0.11, 4.68)   | 0.040   | 9.25                                        | (2.38, 16.12)   | 0.008   |
| Quintile of deprivation (vs 1, least deprived)    |                                                         |                | 0.76    |                                             |                 | 0.95    |
| 2                                                 | 0.86                                                    | (-0.66, 2.38)  |         | -1.28                                       | (-5.85, 3.29)   |         |
| 3                                                 | 0.62                                                    | (-0.90, 2.13)  |         | -0.68                                       | (-5.12, 3.75)   |         |
| 4                                                 | 0.77                                                    | (-0.75, 2.28)  |         | -1.62                                       | (-6.03, 2.78)   |         |
| 5 (most deprived)                                 | 1.00                                                    | (-0.57, 2.57)  |         | -1.49                                       | (-6.04, 3.06)   |         |
| Distance from home to hospital (per 10 km)        | 0.12                                                    | (0.00, 0.24)   | 0.047   | 0.18                                        | (-0.05, 0.41)   | 0.12    |
| Severe comorbidities                              |                                                         |                |         |                                             |                 |         |
| Liver                                             | 3.18                                                    | (-0.01, 6.38)  | 0.050   | 1.25                                        | (-4.67, 7.19)   | 0.68    |
| Renal                                             | -0.45                                                   | (-3.57, 2.66)  | 0.77    | -8.87                                       | (-18.35, 0.60)  | 0.067   |
| Respiratory                                       | 0.01                                                    | (-2.84, 2.85)  | 1.00    | -1.02                                       | (-7.23, 5.19)   | 0.75    |
| Cardiovascular                                    | -0.14                                                   | (-3.23, 2.94)  | 0.93    | 1.40                                        | (-6.46, 9.26)   | 0.73    |
| Metastatic cancer                                 | -2.81                                                   | (-5.78, 0.15)  | 0.063   | 3.26                                        | (-6.38, 12.90)  | 0.51    |
| Haematological malignancy                         | 2.25                                                    | (-1.09, 5.61)  | 0.19    | -7.88                                       | (-14.62, -1.13) | 0.022   |
| Immunocompromise                                  | -0.91                                                   | (-2.74, 0.90)  | 0.33    | -3.90                                       | (-8.55, 0.74)   | 0.10    |
| Dependency (vs none)                              |                                                         |                | 0.30    |                                             |                 | 0.85    |
| Minor or major                                    | -0.14                                                   | (-1.36, 1.08)  |         | 0.63                                        | (-2.34, 3.60)   |         |
| Total                                             | -3.63                                                   | (-8.21, 0.94)  |         | 2.73                                        | (-10.21, 15.67) |         |
| Surgical status (vs non-surgical)                 |                                                         |                | 0.005   |                                             |                 | 0.78    |
| Planned elective/scheduled                        | -2.17                                                   | (-3.51, -0.83) |         | -2.83                                       | (-10.75, 5.10)  |         |
| Unplanned                                         | -0.17                                                   | (-1.29, 0.96)  |         | -0.06                                       | (-3.89, 3.76)   |         |
| ICNARC Physiology Score (per point)               | 0.19                                                    | (0.13, 0.25)   | <0.001  | 0.19                                        | (0.02, 0.35)    | 0.026   |
| ICU length of stay (per day)                      | 0.02                                                    | (-0.03, 0.06)  | 0.44    | -0.34                                       | (-0.48, -0.20)  | <0.001  |
| Advanced respiratory support                      | 3.62                                                    | (2.63, 4.61)   | <0.001  | 1.96                                        | (-1.84, 5.76)   | 0.31    |
| Advanced cardiovascular support                   | 2.06                                                    | (0.89, 3.22)   | 0.001   | 0.83                                        | (-2.06, 3.72)   | 0.58    |
| Renal support                                     | 1.52                                                    | (0.11, 2.93)   | 0.034   | 0.04                                        | (-2.83, 2.91)   | 0.98    |
| Neurological support                              | 1.96                                                    | (0.39, 3.54)   | 0.014   | 2.95                                        | (-0.42, 6.32)   | 0.086   |
| Duration of adv. respiratory support (per day)    | 0.11                                                    | (0.05, 0.16)   | <0.001  | -0.16                                       | (-0.32, 0.00)   | 0.051   |
| Duration of adv. cardiovascular support (per day) | 0.40                                                    | (0.15, 0.65)   | 0.002   | 0.11                                        | (-0.33, 0.56)   | 0.62    |
| Duration of renal support (per day)               | 0.16                                                    | (0.00, 0.32)   | 0.048   | -0.15                                       | (-0.43, 0.13)   | 0.28    |
| Duration of neurological support (per day)        | 0.10                                                    | (-0.09, 0.29)  | 0.31    | 0.05                                        | (-0.43, 0.53)   | 0.84    |
| Death before acute hospital discharge             | -0.49                                                   | (-1.52, 0.55)  | 0.36    | N/A                                         |                 |         |

Coef., coefficient.

1  
2  
3     <sup>a</sup> Two family members returned questionnaires but did not complete any of the 24 FS-ICU items –  
4     responses were not imputed for these family members.  
5  
6  
7  
8  
9  
10  
11  
12  
13  
14  
15  
16  
17  
18  
19  
20  
21  
22  
23  
24  
25  
26  
27  
28  
29  
30  
31  
32  
33  
34  
35  
36  
37  
38  
39  
40  
41  
42  
43  
44  
45  
46  
47  
48  
49  
50  
51  
52  
53  
54  
55  
56  
57  
58  
59  
60

For peer review only

**Table S5** Univariable analysis of factors associated with overall family satisfaction score by ICU outcome – ICU/hospital characteristics and contextual factors

| Variables                                              | Family members of ICU survivors [N=6,147 <sup>a</sup> ] |               |         | Family members of ICU non-survivors [N=870] |                |         |
|--------------------------------------------------------|---------------------------------------------------------|---------------|---------|---------------------------------------------|----------------|---------|
|                                                        | Coef.                                                   | 95% CI        | p-value | Coef.                                       | 95% CI         | p-value |
| Hospital type (vs non-university)                      |                                                         |               | 0.51    |                                             |                | 0.62    |
| University                                             | 0.06                                                    | (-3.63, 3.75) |         | -0.32                                       | (-4.72, 4.07)  |         |
| University affiliated                                  | 1.93                                                    | (-1.56, 5.42) |         | 1.68                                        | (-2.29, 5.65)  |         |
| Number of ICU beds (per bed)                           | -0.05                                                   | (-0.23, 0.14) | 0.63    | 0.02                                        | (-0.22, 0.26)  | 0.85    |
| Month of ICU admission (vs January)                    |                                                         |               | 0.95    |                                             |                | 0.85    |
| February                                               | -0.61                                                   | (-2.87, 1.65) |         | -0.03                                       | (-6.90, 6.83)  |         |
| March                                                  | 0.09                                                    | (-2.12, 2.30) |         | -0.06                                       | (-6.73, 6.60)  |         |
| April                                                  | 0.54                                                    | (-1.71, 2.79) |         | 0.07                                        | (-6.93, 7.07)  |         |
| May                                                    | -0.06                                                   | (-2.31, 2.18) |         | 0.73                                        | (-5.62, 7.08)  |         |
| June                                                   | -0.66                                                   | (-2.65, 1.34) |         | 0.84                                        | (-4.95, 6.64)  |         |
| July                                                   | 0.85                                                    | (-1.41, 3.11) |         | 3.91                                        | (-2.71, 10.52) |         |
| August                                                 | 0.65                                                    | (-1.64, 2.93) |         | -0.70                                       | (-6.87, 5.46)  |         |
| September                                              | 0.09                                                    | (-2.14, 2.31) |         | 1.74                                        | (-4.76, 8.25)  |         |
| October                                                | 0.44                                                    | (-1.76, 2.63) |         | 1.15                                        | (-5.69, 7.98)  |         |
| November                                               | 0.60                                                    | (-1.65, 2.85) |         | 2.21                                        | (-4.10, 8.53)  |         |
| December                                               | 0.69                                                    | (-1.57, 2.96) |         | 5.16                                        | (-1.13, 11.46) |         |
| Questionnaire received while patient still in hospital | 0.087                                                   | (-1.50, 1.67) | 0.91    | N/A                                         |                |         |

Coef., coefficient.

<sup>a</sup> Two family members returned questionnaires but did not complete any of the 24 FS-ICU items – responses were not imputed for these family members.



**Table S6** Sensitivity analyses –candidate determinants for the multivariable multilevel models for the family satisfaction in the intensive care unit

| Candidate determinants                                         | Justification inclusion/exclusion                                                                                                                                                                                | Approach to modelling                                                                                                  |
|----------------------------------------------------------------|------------------------------------------------------------------------------------------------------------------------------------------------------------------------------------------------------------------|------------------------------------------------------------------------------------------------------------------------|
| <b>Family member level</b>                                     |                                                                                                                                                                                                                  |                                                                                                                        |
| Education level                                                | It was not considered in the multivariable models due to higher than expected proportions of both “Not stated” (17%) and “Other” (21%) responses, suggesting a lack of comprehension of the categorisation used. |                                                                                                                        |
| Distance from home to hospital                                 | No significant after adjusting for other variables in the model. It was dropped.                                                                                                                                 |                                                                                                                        |
| Family member age, years                                       | Controlling effect                                                                                                                                                                                               | Categorical (<30;30-39;40-49;50-59;60-69;70-79;80+)                                                                    |
| Family member sex                                              | Controlling effect                                                                                                                                                                                               | Categorical (male; female)                                                                                             |
| Family member ethnicity                                        | Statistically significant in univariable                                                                                                                                                                         | Categorical (white; non-white)                                                                                         |
| Next-of-kin/lives with patient                                 | There was a strong multicollinearity between relationship to the patient and the other key variables of next-of-kin and lives with patient.                                                                      | Categorical (lives with patient; Next-of-kin, does not live with patient; Not next-of-kin, does not live with patient) |
| Frequent visitor                                               | Statistically significant in univariable                                                                                                                                                                         | Binary (yes; no)                                                                                                       |
| <b>Patient level</b>                                           |                                                                                                                                                                                                                  |                                                                                                                        |
| Patient ethnicity                                              | It was not carried forward to the multivariable models due to collinearity with family member ethnicity.                                                                                                         |                                                                                                                        |
| Patient age                                                    | Controlling effect                                                                                                                                                                                               | Continuous(linear)                                                                                                     |
| Patient sex                                                    | Controlling effect                                                                                                                                                                                               | Categorical (male; female)                                                                                             |
| Dependency                                                     | Controlling effect                                                                                                                                                                                               | Categorical (none; minor or major; total)                                                                              |
| Surgical status (vs non-surgical)                              | Controlling effect                                                                                                                                                                                               | Categorical (non-surgical; planned elective/scheduled; unplanned)                                                      |
| ICNARC Physiology Score                                        | Statistically significant in univariable                                                                                                                                                                         | Continuous(linear)                                                                                                     |
| ICU length of stay (days)                                      |                                                                                                                                                                                                                  | Continuous(linear)                                                                                                     |
| Organ support received in the ICU and duration (calendar days) | Once included in the multivariable model for                                                                                                                                                                     |                                                                                                                        |

|                                                    |                                                                                                                                                      |                                                                 |
|----------------------------------------------------|------------------------------------------------------------------------------------------------------------------------------------------------------|-----------------------------------------------------------------|
| of organ support among those receiving the support | survivors, only advanced respiratory support remained significant.                                                                                   |                                                                 |
| Advanced respiratory support                       | It was found to be preferable to alternative variable of the duration of advanced respiratory support, which was correlated with ICU length of stay. | Binary (yes; no)                                                |
| haematological malignancy                          | No significant after adjusting for other variables in the model. It was dropped.                                                                     |                                                                 |
| <b>ICU/hospital level</b>                          |                                                                                                                                                      |                                                                 |
| Hospital type                                      | Controlling effect                                                                                                                                   | Categorical (non-university; university; university affiliated) |
| Number of ICU beds                                 | Controlling effect                                                                                                                                   | Continuous(linear)                                              |

**Table S7** Multivariable multilevel models for the satisfaction with care domain score

| Variables                                              | Family members of ICU survivors [N=6,143 <sup>a</sup> ] |                 |         | Family members of ICU non-survivors [N=869 <sup>a</sup> ] |                |         |
|--------------------------------------------------------|---------------------------------------------------------|-----------------|---------|-----------------------------------------------------------|----------------|---------|
|                                                        | Coef.                                                   | 95% CI          | p-value | Coef.                                                     | 95% CI         | p-value |
| Fixed effects – family member level                    |                                                         |                 |         |                                                           |                |         |
| Constant                                               | 71.45                                                   | (66.67, 76.22)  | <0.001  | 55.29                                                     | (41.76, 68.82) | <0.001  |
| Family member age, years (vs <30)                      |                                                         |                 | 0.001   |                                                           |                | 0.16    |
| 30-39                                                  | 2.60                                                    | (0.81, 4.38)    |         | 2.50                                                      | (-1.97, 6.97)  |         |
| 40-49                                                  | 2.73                                                    | (1.16, 4.31)    |         | 4.31                                                      | (0.09, 8.54)   |         |
| 50-59                                                  | 2.91                                                    | (1.36, 4.44)    |         | 4.99                                                      | (0.93, 9.04)   |         |
| 60-69                                                  | 2.67                                                    | (1.08, 4.26)    |         | 4.89                                                      | (0.54, 9.23)   |         |
| 70-79                                                  | 2.66                                                    | (0.90, 4.41)    |         | 5.91                                                      | (0.88, 10.94)  |         |
| 80+                                                    | -0.17                                                   | (-2.76, 2.41)   |         | 1.85                                                      | (-4.51, 8.21)  |         |
| Family member sex – female (vs male)                   | 0.42                                                    | (-0.35, 1.20)   | 0.29    | 0.22                                                      | (-1.81, 2.25)  | 0.83    |
| Family member ethnicity – white (vs non-white)         | 3.87                                                    | (1.77, 5.97)    | <0.001  | 6.99                                                      | (0.19, 13.81)  | 0.044   |
| Next-of-kin/lives with patient (vs lives with patient) |                                                         |                 | <0.001  |                                                           |                | 0.15    |
| Next-of-kin, does not live with patient                | -1.14                                                   | (-2.26, -0.02)  |         | 0.95                                                      | (-2.39, 4.29)  |         |
| Not next-of-kin, does not live with patient            | -2.44                                                   | (-3.32, -1.55)  |         | -1.58                                                     | (-4.11, 0.94)  |         |
| Frequent visitor                                       | 2.49                                                    | (1.52, 3.46)    | <0.001  | 1.49                                                      | (-1.27, 4.25)  | 0.29    |
| Fixed effects – patient level                          |                                                         |                 |         |                                                           |                |         |
| Patient age (per 10 years)                             | 0.03                                                    | (-0.25, 0.31)   | 0.83    | 1.21                                                      | (0.16, 2.26)   | 0.024   |
| Patient sex – female (vs male)                         | 0.06                                                    | (-0.85, 0.98)   | 0.87    | 1.85                                                      | (-0.79, 4.5)   | 0.17    |
| Dependency (vs none)                                   |                                                         |                 | 0.006   |                                                           |                | 0.68    |
| Minor or major                                         | -0.74                                                   | (-1.96, 0.46)   |         | -0.94                                                     | (-3.98, 2.09)  |         |
| Total                                                  | -6.77                                                   | (-11.18, -2.36) |         | 3.62                                                      | (-8.71, 15.95) |         |
| Surgical status (vs non-surgical)                      |                                                         |                 | 0.68    |                                                           |                | 0.47    |
| Planned elective/scheduled                             | -0.62                                                   | (-2.04, 0.78)   |         | -4.85                                                     | (-12.71, 2.99) |         |
| Unplanned                                              | -0.15                                                   | (-1.27, 0.95)   |         | -0.57                                                     | (-4.29, 3.13)  |         |
| ICNARC Physiology Score (per point)                    | 0.14                                                    | (0.07, 0.21)    | <0.001  | 0.14                                                      | (-0.03, 0.30)  | 0.10    |
| ICU length of stay (per day)                           | -0.02                                                   | (-0.06, 0.02)   | 0.39    | -0.30                                                     | (-0.45, -0.15) | <0.001  |
| Advanced respiratory support                           | 2.74                                                    | (1.66, 3.82)    | <0.001  |                                                           |                |         |
| Fixed effects – ICU/hospital level                     |                                                         |                 |         |                                                           |                |         |
| Hospital type (vs non-university)                      |                                                         |                 | 0.51    |                                                           |                | 0.58    |

|                                        |                     |                    |                    |      |
|----------------------------------------|---------------------|--------------------|--------------------|------|
| University                             | 0.94 (-3.58, 5.47)  | -1.48 (-7.8, 4.84) |                    |      |
| University affiliated                  | 1.92 (-1.34, 5.19)  | 1.79 (-2.75, 6.34) |                    |      |
| Number of ICU beds (per bed)           | -0.01 (-0.24, 0.23) | 0.96               | 0.24 (-0.12, 0.59) | 0.19 |
| Random effects – SD (SE)               |                     |                    |                    |      |
| Between ICUs                           | 2.98 (0.60)         | 3.25 (1.11)        |                    |      |
| Within ICUs between patients           | 9.76 (0.28)         | 10.47 (0.66)       |                    |      |
| Within patients between family members | 11.96 (0.19)        | 11.92 (0.42)       |                    |      |

Coef, coefficient; SE, standard error.

<sup>a</sup> Five patients were missing age group on both the questionnaire and web portal – due to the very small amount of missing data in this key variable, these missing values were not imputed.

**Table S8** Multivariable multilevel models for the satisfaction with information domain score

| Variables                                              | Family members of ICU survivors [N=6,143 <sup>a</sup> ] |                |         | Family members of ICU non-survivors [N=869 <sup>a</sup> ] |                |         |
|--------------------------------------------------------|---------------------------------------------------------|----------------|---------|-----------------------------------------------------------|----------------|---------|
|                                                        | Coef.                                                   | 95% CI         | p-value | Coef.                                                     | 95% CI         | p-value |
| Fixed effects – family member level                    |                                                         |                |         |                                                           |                |         |
| Constant                                               | 66.07                                                   | (59.78, 72.21) | <0.001  | 55.86                                                     | (39.34, 72.38) | <0.001  |
| Family member age, years (vs <30)                      |                                                         |                | 0.63    |                                                           |                | 0.28    |
| 30-39                                                  | 0.28                                                    | (-2.22, 2.79)  |         | 1.23                                                      | (-4.92, 7.39)  |         |
| 40-49                                                  | 0.00                                                    | (-2.21, 2.21)  |         | 1.88                                                      | (-3.92, 7.68)  |         |
| 50-59                                                  | 0.55                                                    | (-1.62, 2.72)  |         | 2.88                                                      | (-2.70, 8.48)  |         |
| 60-69                                                  | -0.1                                                    | (-2.35, 2.14)  |         | 4.24                                                      | (-1.71, 10.2)  |         |
| 70-79                                                  | -0.41                                                   | (-2.89, 2.08)  |         | 6.43                                                      | (-0.45, 13.31) |         |
| 80+                                                    | -2.67                                                   | (-6.35, 1.01)  |         | -1.96                                                     | (-10.71, 6.79) |         |
| Family member sex – female (vs male)                   | 0.20                                                    | (-0.89, 1.30)  | 0.72    | 1.01                                                      | (-1.81, 3.82)  | 0.49    |
| Family member ethnicity – white (vs non-white)         | 4.73                                                    | (1.78, 7.68)   | 0.002   | 9.34                                                      | (0.47, 18.21)  | 0.039   |
| Next-of-kin/lives with patient (vs lives with patient) |                                                         |                | <0.001  |                                                           |                | 0.38    |
| Next-of-kin, does not live with patient                | -2.39                                                   | (-3.97, 0.81)  |         | 1.43                                                      | (-3.09, 5.95)  |         |
| Not next-of-kin, does not live with patient            | -2.57                                                   | (-3.83, 1.31)  |         | -1.21                                                     | (-4.69, 2.28)  |         |
| Frequent visitor                                       | 2.11                                                    | (0.74, 3.48)   | 0.002   | 0.44                                                      | (-3.33, 4.22)  | 0.82    |
| Fixed effects – patient level                          |                                                         |                |         |                                                           |                |         |
| Patient age (per 10 years)                             | -0.22                                                   | (-0.61, 0.18)  | 0.28    | 0.92                                                      | (-0.43, 2.27)  | 0.18    |
| Patient sex – female (vs male)                         | 0.32                                                    | (-0.98, 1.62)  | 0.63    | 1.93                                                      | (-1.48, 5.35)  | 0.27    |
| Dependency (vs none)                                   |                                                         |                | 0.61    |                                                           |                | 0.51    |
| Minor or major                                         | -0.49                                                   | (-2.2, 1.2)    |         | -0.28                                                     | (-4.11, 3.53)  |         |
| Total                                                  | -2.69                                                   | (-8.92, 3.52)  |         | 9.15                                                      | (-6.57, 24.87) |         |
| Surgical status (vs non-surgical)                      |                                                         |                | 0.88    |                                                           |                | 0.84    |
| Planned elective/scheduled                             | -0.32                                                   | (-2.32, 1.66)  |         | -0.88                                                     | (-10.97, 9.21) |         |
| Unplanned                                              | 0.23                                                    | (-1.33, 1.80)  |         | -1.4                                                      | (-6.16, 3.36)  |         |
| ICNARC Physiology Score (per point)                    | 0.23                                                    | (0.13, 0.33)   | <0.001  | 0.15                                                      | (-0.04, 0.36)  | 0.13    |
| ICU length of stay (per day)                           | -0.05                                                   | (-0.11, 0.01)  | 0.14    | -0.43                                                     | (-0.62, -0.24) | <0.001  |
| Advanced respiratory support                           | 3.34                                                    | (1.83, 4.85)   | <0.001  | --                                                        |                |         |
| Fixed effects – ICU/hospital level                     |                                                         |                |         |                                                           |                |         |
| Hospital type (vs non-university)                      |                                                         |                | 0.45    |                                                           |                | 0.58    |

|                                        |       |               |       |                         |
|----------------------------------------|-------|---------------|-------|-------------------------|
| University                             | 1.69  | (-3.71, 7.08) | 0.35  | (-6.42, 7.13)           |
| University affiliated                  | 2.48  | (-1.42, 6.40) | 2.53  | (-2.32, 7.39)           |
| Number of ICU beds (per bed)           | -0.03 | (-0.31, 0.24) | 0.81  | 0.21 (-0.17, 0.61) 0.27 |
| Random effects – SD (SE)               |       |               |       |                         |
| Between ICUs                           | 3.48  | (0.73)        | 2.81  | (1.37)                  |
| Within ICUs between patients           | 13.64 | (0.41)        | 12.38 | (0.97)                  |
| Within patients between family members | 16.88 | (0.27)        | 17.02 | (0.60)                  |

Coef, coefficient; SE, standard error.

<sup>a</sup> Five patients were missing age group on both the questionnaire and web portal – due to the very small amount of missing data in this key variable, these missing values were not imputed.

**Table S9** Multivariable multilevel models for the satisfaction with the decision-making process domain score

| Variables                                              | Family members of ICU survivors [N=6,143 <sup>a</sup> ] |                | Family members of ICU non-survivors [N=869 <sup>a</sup> ] |       |                 |         |
|--------------------------------------------------------|---------------------------------------------------------|----------------|-----------------------------------------------------------|-------|-----------------|---------|
|                                                        | Coef.                                                   | 95% CI         | p-value                                                   | Coef. | 95% CI          | p-value |
| Fixed effects – family member level                    |                                                         |                |                                                           |       |                 |         |
| Constant                                               | 61.65                                                   | (55.17, 68.14) | <0.001                                                    | 39.62 | (20.14, 59.09)  | <0.001  |
| Family member age, years (vs <30)                      |                                                         |                | 0.061                                                     |       |                 | 0.40    |
| 30-39                                                  | 1.66                                                    | (-1.63, 4.95)  |                                                           | 1.37  | (-5.35, 8.10)   |         |
| 40-49                                                  | 0.02                                                    | (-2.76, 2.82)  |                                                           | 2.73  | (-3.47, 8.95)   |         |
| 50-59                                                  | 0.52                                                    | (-2.21, 3.25)  |                                                           | 3.34  | (-2.61, 9.31)   |         |
| 60-69                                                  | -1.43                                                   | (-4.48, 1.61)  |                                                           | 3.35  | (-3.05, 9.77)   |         |
| 70-79                                                  | -1.09                                                   | (-4.32, 2.13)  |                                                           | 6.25  | (-1.36, 13.88)  |         |
| 80+                                                    | -3.87                                                   | (-8.43, 0.69)  |                                                           | -3.13 | (-12.88, 6.61)  |         |
| Family member sex – female (vs male)                   | -0.18                                                   | (-1.42, 1.04)  | 0.77                                                      | 1.66  | (-1.37, 4.71)   | 0.28    |
| Family member ethnicity – white (vs non-white)         | 0.81                                                    | (-2.67, 4.30)  | 0.65                                                      | 6.46  | (-4.24, 17.15)  | 0.24    |
| Next-of-kin/lives with patient (vs lives with patient) |                                                         |                | 0.10                                                      |       |                 | 0.86    |
| Next-of-kin, does not live with patient                | -0.93                                                   | (-2.93, 1.05)  |                                                           | 1.39  | (-3.49, 6.28)   |         |
| Not next-of-kin, does not live with patient            | -1.65                                                   | (-3.22, 0.07)  |                                                           | 0.48  | (-3.49, 4.46)   |         |
| Frequent visitor                                       | 5.31                                                    | (3.38, 7.23)   | <0.001                                                    | 3.84  | (-0.21, 7.91)   | 0.063   |
| Fixed effects – patient level                          |                                                         |                |                                                           |       |                 |         |
| Patient age (per 10 years)                             | 0.26                                                    | (-0.20, 0.73)  | 0.27                                                      | 2.19  | (0.61, 3.78)    | 0.007   |
| Patient sex – female (vs male)                         | 0.79                                                    | (-0.84, 2.43)  | 0.34                                                      | 1.29  | (-2.67, 5.26)   | 0.52    |
| Dependency (vs none)                                   |                                                         |                | 0.44                                                      |       |                 | 0.47    |
| Minor or major                                         | 1.34                                                    | (-0.74, 3.43)  |                                                           | 2.91  | (-1.48, 7.29)   |         |
| Total                                                  | 0.11                                                    | (-7.42, 7.64)  |                                                           | 4.27  | (-17.36, 25.91) |         |
| Surgical status (vs non-surgical)                      |                                                         |                | 0.25                                                      |       |                 | 0.68    |
| Planned elective/scheduled                             | -1.83                                                   | (-4.35, 0.68)  |                                                           | -1.09 | (-12.59, 10.41) |         |
| Unplanned                                              | -1.35                                                   | (-3.41, 0.71)  |                                                           | 2.35  | (-3.20, 7.91)   |         |
| ICNARC Physiology Score (per point)                    | 0.12                                                    | (0.01, 0.24)   | 0.040                                                     | 0.19  | (-0.04, 0.44)   | 0.12    |
| ICU length of stay (per day)                           | 0.03                                                    | (-0.04, 0.11)  | 0.39                                                      | -0.17 | (-0.39, 0.03)   | 0.11    |
| Advanced respiratory support                           | 3.03                                                    | (1.08, 4.97)   | 0.002                                                     | --    |                 |         |
| Fixed effects – ICU/hospital level                     |                                                         |                |                                                           |       |                 |         |

|                                        |                     |      |                      |       |
|----------------------------------------|---------------------|------|----------------------|-------|
| Hospital type (vs non-university)      |                     | 0.50 |                      | 0.55  |
| University                             | -0.41 (-4.27, 3.46) |      | -4.44 (-12.41, 3.53) |       |
| University affiliated                  | 1.51 (-1.37, 4.39)  |      | -0.86 (-6.56, 4.83)  |       |
| Number of ICU beds (per bed)           | 0.02 (-0.19, 0.23)  | 0.85 | 0.47 (0.02, 0.93)    | 0.042 |
| Random effects – SD (SE)               |                     |      |                      |       |
| Between ICUs                           | 2.06 (0.66)         |      | 3.33 (1.50)          |       |
| Within ICUs between patients           | 17.24 (0.50)        |      | 15.84 (1.06)         |       |
| Within patients between family members | 17.02 (0.40)        |      | 16.81 (0.66)         |       |

Coef, coefficient; SE, standard error.

<sup>a</sup> Five patients were missing age group on both the questionnaire and web portal – due to the very small amount of missing data in this key variable, these missing values were not imputed.



**Figure S2** Variation across ICUs in the mean: satisfaction with care domain score (A) before and (B) after adjustment; satisfaction with information domain score (C) before and (D) after adjustment; and satisfaction with the decision-making process domain score (E) before and (F) after adjustment

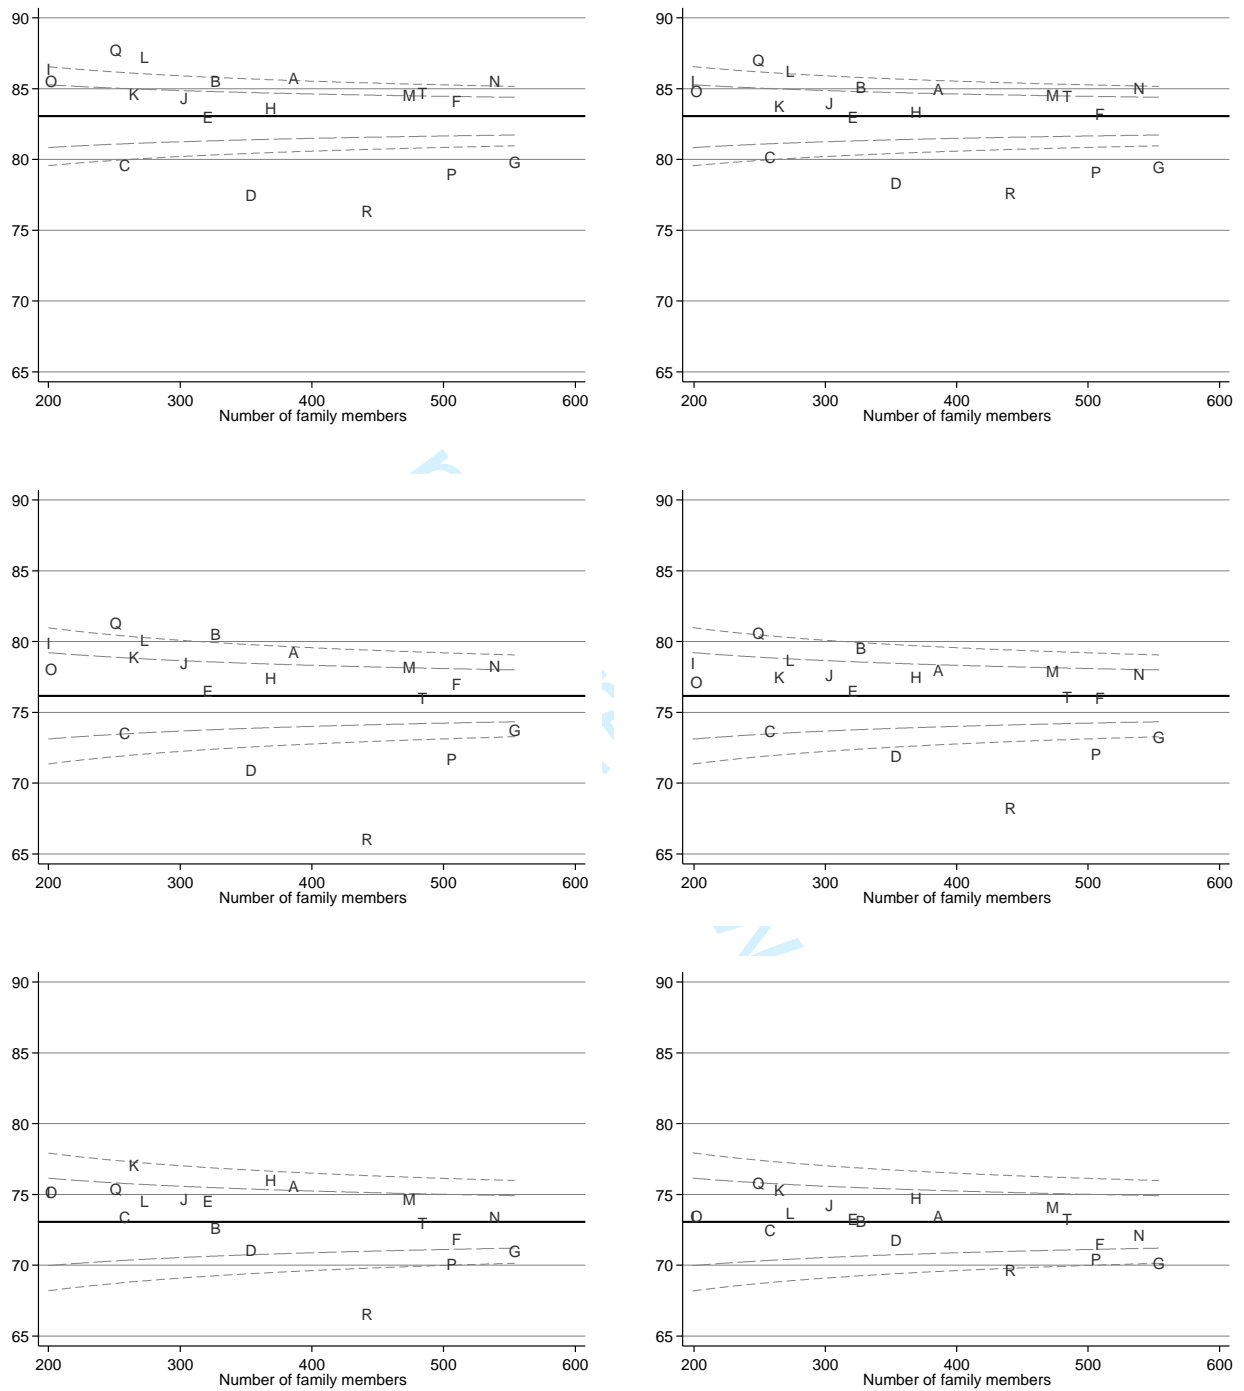

**Table S10** Sensitivity analyses – alternative approach to handling missing data (family members of ICU survivors)

| Variables                                              | Complete case<br>[N=2,351] |      |         | Traditional approach<br>[N=5,756] |      |         |
|--------------------------------------------------------|----------------------------|------|---------|-----------------------------------|------|---------|
|                                                        | Coef.                      | SE   | p-value | Coef.                             | SE   | p-value |
| Constant                                               | 72.60                      | 3.18 | <0.001  | 70.35                             | 2.49 | <0.001  |
| Family member age, years (vs <30)                      |                            |      | 0.61    |                                   |      | 0.20    |
| 30-39                                                  | 0.13                       | 1.40 |         | 1.47                              | 0.97 |         |
| 40-49                                                  | 0.85                       | 1.22 |         | 1.41                              | 0.86 |         |
| 50-59                                                  | 0.66                       | 1.20 |         | 1.58                              | 0.84 |         |
| 60-69                                                  | 0.65                       | 1.30 |         | 1.47                              | 0.88 |         |
| 70-79                                                  | 0.77                       | 1.47 |         | 1.69                              | 0.98 |         |
| 80+                                                    | -3.06                      | 2.26 |         | -1.22                             | 1.50 |         |
| Family member sex – female (vs male)                   | 0.94                       | 0.60 | 0.12    | 0.21                              | 0.43 | 0.63    |
| Family member ethnicity – white (vs non-white)         | 7.58                       | 1.58 | <0.001  | 3.99                              | 1.16 | 0.001   |
| Next-of-kin/lives with patient (vs lives with patient) |                            |      | 0.071   |                                   |      | 0.002   |
| Next-of-kin, does not live with patient                | -1.69                      | 0.85 |         | -1.36                             | 0.61 |         |
| Not next-of-kin, does not live with patient            | -1.42                      | 0.72 |         | -1.70                             | 0.50 |         |
| Frequent visitor                                       | 1.18                       | 0.82 | 0.15    | 2.21                              | 0.55 | <0.001  |
| Patient age (per 10 years)                             | -0.09                      | 0.22 | 0.67    | -0.07                             | 0.15 | 0.64    |
| Patient sex – female (vs male)                         | -1.20                      | 0.73 | 0.10    | 0.13                              | 0.52 | 0.79    |
| Dependency (vs none)                                   |                            |      | 0.70    |                                   |      | 0.45    |
| Minor or major                                         | -0.44                      | 0.92 |         | -0.19                             | 0.68 |         |
| Total                                                  | -2.19                      | 2.98 |         | -3.14                             | 2.51 |         |
| Surgical status (vs non-surgical)                      |                            |      | 0.056   |                                   |      | 0.47    |
| Planned elective/scheduled                             | -3.11                      | 1.30 |         | -0.93                             | 0.80 |         |
| Unplanned                                              | -0.44                      | 0.88 |         | 0.02                              | 0.62 |         |
| ICNARC Physiology Score (per point)                    | 0.08                       | 0.05 | 0.14    | 0.15                              | 0.04 | <0.001  |
| ICU length of stay (per day)                           | -0.04                      | 0.03 | 0.28    | -0.04                             | 0.03 | 0.17    |
| Advanced respiratory support                           | 1.39                       | 0.87 | 0.11    | 2.40                              | 0.60 | <0.001  |
| Hospital type (vs non-university)                      |                            |      | 0.42    |                                   |      | 0.34    |
| University                                             | 0.56                       | 2.36 |         | 1.45                              | 2.22 |         |

1  
2  
3  
4  
5  
6  
7  
8  
9  
10  
11  
12  
13  
14  
15  
16  
17  
18  
19  
20  
21  
22  
23  
24  
25  
26  
27  
28  
29  
30  
31  
32  
33  
34  
35  
36  
37  
38  
39  
40  
41  
42  
43  
44  
45  
46  
47  
48  
49  
50  
51  
52  
53  
54  
55  
56  
57  
58  
59  
60

|                              |      |      |      |       |      |      |
|------------------------------|------|------|------|-------|------|------|
| University affiliated        | 2.24 | 1.72 |      | 2.34  | 1.61 |      |
| Number of ICU beds (per bed) | 0.07 | 0.12 | 0.59 | -0.02 | 0.11 | 0.83 |

---

Coef., coefficient; SE, standard error.

For peer review only

**Table S11** Sensitivity analyses – alternative approaches to handling missing data (family members of ICU non-survivors)

| Variables                                              | Complete case |      |         | Traditional approach |      |         |
|--------------------------------------------------------|---------------|------|---------|----------------------|------|---------|
|                                                        | [N=547]       |      |         | [N=851]              |      |         |
|                                                        | Coef.         | SE   | p-value | Coef.                | SE   | p-value |
| Constant                                               | 54.46         | 7.72 | <0.001  | 56.28                | 6.80 | <0.001  |
| Family member age, years (vs <30)                      |               |      | 0.17    |                      |      | 0.086   |
| 30-39                                                  | 4.38          | 3.01 |         | 3.14                 | 2.44 |         |
| 40-49                                                  | 7.51          | 2.75 |         | 4.87                 | 2.31 |         |
| 50-59                                                  | 6.19          | 2.62 |         | 4.50                 | 2.22 |         |
| 60-69                                                  | 7.41          | 2.85 |         | 5.94                 | 2.37 |         |
| 70-79                                                  | 6.99          | 3.69 |         | 7.07                 | 2.82 |         |
| 80+                                                    | 7.52          | 4.41 |         | 0.32                 | 3.61 |         |
| Family member sex – female (vs male)                   | -0.02         | 1.43 | 0.99    | 0.40                 | 1.11 | 0.72    |
| Family member ethnicity – white (vs non-white)         | 9.64          | 4.21 | 0.022   | 7.47                 | 3.58 | 0.037   |
| Next-of-kin/lives with patient (vs lives with patient) |               |      | 0.97    |                      |      | 0.38    |
| Next-of-kin, does not live with patient                | 0.13          | 2.20 |         | 1.27                 | 1.82 |         |
| Not next-of-kin, does not live with patient            | -0.32         | 1.81 |         | -0.82                | 1.40 |         |
| Frequent visitor                                       | 1.32          | 1.96 | 0.50    | 0.99                 | 1.51 | 0.51    |
| Patient age (per 10 years)                             | 0.69          | 0.66 | 0.29    | 1.09                 | 0.55 | 0.048   |
| Patient sex – female (vs male)                         | 1.56          | 1.69 | 0.36    | 2.02                 | 1.41 | 0.15    |
| Dependency (vs none)                                   |               |      | 0.47    |                      |      | 0.66    |
| Minor or major                                         | -0.61         | 1.86 |         | -0.32                | 1.58 |         |
| Total                                                  | 8.53          | 7.42 |         | 5.59                 | 6.45 |         |
| Surgical status (vs non-surgical)                      |               |      | 0.84    |                      |      | 0.51    |
| Planned elective/scheduled                             | -0.33         | 5.61 |         | -4.86                | 4.22 |         |
| Unplanned                                              | -1.38         | 2.33 |         | -0.44                | 1.95 |         |
| ICNARC Physiology Score (per point)                    | 0.24          | 0.10 | 0.022   | 0.18                 | 0.09 | 0.041   |
| ICU length of stay (per day)                           | -0.27         | 0.09 | 0.003   | -0.33                | 0.08 | <0.001  |
| Hospital type (vs non-university)                      |               |      | 0.83    |                      |      | 0.77    |
| University                                             | -1.15         | 3.20 |         | -0.11                | 3.01 |         |
| University affiliated                                  | 0.84          | 2.29 |         | 1.49                 | 2.17 |         |

1  
2  
3  
4  
5  
6  
7  
8  
9  
10  
11  
12  
13  
14  
15  
16  
17  
18  
19  
20  
21  
22  
23  
24  
25  
26  
27  
28  
29  
30  
31  
32  
33  
34  
35  
36  
37  
38  
39  
40  
41  
42  
43  
44  
45  
46  
47  
48  
49  
50  
51  
52  
53  
54  
55  
56  
57  
58  
59  
60

|                              |      |      |      |      |      |      |
|------------------------------|------|------|------|------|------|------|
| Number of ICU beds (per bed) | 0.25 | 0.19 | 0.17 | 0.21 | 0.17 | 0.23 |
|------------------------------|------|------|------|------|------|------|

---

Coef., coefficient; SE, standard error.

For peer review only

## STROBE Statement—checklist of items that should be included in reports of observational studies

|                              | Item No | Recommendation                                                                                                                                                                                                                                                                                                                                                                                                                                                         | Page No |
|------------------------------|---------|------------------------------------------------------------------------------------------------------------------------------------------------------------------------------------------------------------------------------------------------------------------------------------------------------------------------------------------------------------------------------------------------------------------------------------------------------------------------|---------|
| <b>Title and abstract</b>    | 1       | (a) Indicate the study's design with a commonly used term in the title or the abstract                                                                                                                                                                                                                                                                                                                                                                                 | 1       |
|                              |         | (b) Provide in the abstract an informative and balanced summary of what was done and what was found                                                                                                                                                                                                                                                                                                                                                                    | 3       |
| <b>Introduction</b>          |         |                                                                                                                                                                                                                                                                                                                                                                                                                                                                        |         |
| Background/rationale         | 2       | Explain the scientific background and rationale for the investigation being reported                                                                                                                                                                                                                                                                                                                                                                                   | 5       |
| Objectives                   | 3       | State specific objectives, including any prespecified hypotheses                                                                                                                                                                                                                                                                                                                                                                                                       | 5       |
| <b>Methods</b>               |         |                                                                                                                                                                                                                                                                                                                                                                                                                                                                        |         |
| Study design                 | 4       | Present key elements of study design early in the paper                                                                                                                                                                                                                                                                                                                                                                                                                | 5       |
| Setting                      | 5       | Describe the setting, locations, and relevant dates, including periods of recruitment, exposure, follow-up, and data collection                                                                                                                                                                                                                                                                                                                                        | 5       |
| Participants                 | 6       | (a) <i>Cohort study</i> —Give the eligibility criteria, and the sources and methods of selection of participants. Describe methods of follow-up<br><i>Case-control study</i> —Give the eligibility criteria, and the sources and methods of case ascertainment and control selection. Give the rationale for the choice of cases and controls<br><i>Cross-sectional study</i> —Give the eligibility criteria, and the sources and methods of selection of participants | 6       |
|                              |         | (b) <i>Cohort study</i> —For matched studies, give matching criteria and number of exposed and unexposed<br><i>Case-control study</i> —For matched studies, give matching criteria and the number of controls per case                                                                                                                                                                                                                                                 | N/A     |
| Variables                    | 7       | Clearly define all outcomes, exposures, predictors, potential confounders, and effect modifiers. Give diagnostic criteria, if applicable                                                                                                                                                                                                                                                                                                                               | 6-7     |
| Data sources/<br>measurement | 8*      | For each variable of interest, give sources of data and details of methods of assessment (measurement). Describe comparability of assessment methods if there is more than one group                                                                                                                                                                                                                                                                                   |         |
| Bias                         | 9       | Describe any efforts to address potential sources of bias                                                                                                                                                                                                                                                                                                                                                                                                              | 5       |
| Study size                   | 10      | Explain how the study size was arrived at                                                                                                                                                                                                                                                                                                                                                                                                                              | N/A     |
| Quantitative variables       | 11      | Explain how quantitative variables were handled in the analyses. If applicable, describe which groupings were chosen and why                                                                                                                                                                                                                                                                                                                                           | 6-7     |
| Statistical methods          | 12      | (a) Describe all statistical methods, including those used to control for confounding                                                                                                                                                                                                                                                                                                                                                                                  | 6-7     |
|                              |         | (b) Describe any methods used to examine subgroups and interactions                                                                                                                                                                                                                                                                                                                                                                                                    | N/A     |
|                              |         | (c) Explain how missing data were addressed                                                                                                                                                                                                                                                                                                                                                                                                                            | 6-7     |
|                              |         | (d) <i>Cohort study</i> —If applicable, explain how loss to follow-up was addressed<br><i>Case-control study</i> —If applicable, explain how matching of cases and controls was addressed<br><i>Cross-sectional study</i> —If applicable, describe analytical methods taking account of sampling strategy                                                                                                                                                              |         |
|                              |         | (e) Describe any sensitivity analyses                                                                                                                                                                                                                                                                                                                                                                                                                                  | 7       |

Continued on next page

| <b>Results</b>           |     |                                                                                                                                                                                                                                                                                                 |                                               |
|--------------------------|-----|-------------------------------------------------------------------------------------------------------------------------------------------------------------------------------------------------------------------------------------------------------------------------------------------------|-----------------------------------------------|
| Participants             | 13* | (a) Report numbers of individuals at each stage of study—eg numbers potentially eligible, examined for eligibility, confirmed eligible, included in the study, completing follow-up, and analysed<br>(b) Give reasons for non-participation at each stage<br>(c) Consider use of a flow diagram | 7<br><br>Supplementary materials<br>Figure S1 |
| Descriptive data         | 14* | (a) Give characteristics of study participants (eg demographic, clinical, social) and information on exposures and potential confounders                                                                                                                                                        | Page 7-8 & Tables 1 & 2                       |
|                          |     | (b) Indicate number of participants with missing data for each variable of interest                                                                                                                                                                                                             | Supplementary materials<br>Tables S10 & S11   |
|                          |     | (c) <i>Cohort study</i> —Summarise follow-up time (eg, average and total amount)                                                                                                                                                                                                                | N/A                                           |
| Outcome data             | 15* | <i>Cohort study</i> —Report numbers of outcome events or summary measures over time                                                                                                                                                                                                             | 8 & Table 3                                   |
|                          |     | <i>Case-control study</i> —Report numbers in each exposure category, or summary measures of exposure                                                                                                                                                                                            |                                               |
|                          |     | <i>Cross-sectional study</i> —Report numbers of outcome events or summary measures                                                                                                                                                                                                              |                                               |
| Main results             | 16  | (a) Give unadjusted estimates and, if applicable, confounder-adjusted estimates and their precision (eg, 95% confidence interval). Make clear which confounders were adjusted for and why they were included                                                                                    | 8 & 9, Table 4 & Supplement<br>Tables S7-9 &  |
|                          |     | (b) Report category boundaries when continuous variables were categorized                                                                                                                                                                                                                       |                                               |
|                          |     | (c) If relevant, consider translating estimates of relative risk into absolute risk for a meaningful time period                                                                                                                                                                                |                                               |
| Other analyses           | 17  | Report other analyses done—eg analyses of subgroups and interactions, and sensitivity analyses                                                                                                                                                                                                  | 9 & supplement                                |
| <b>Discussion</b>        |     |                                                                                                                                                                                                                                                                                                 |                                               |
| Key results              | 18  | Summarise key results with reference to study objectives                                                                                                                                                                                                                                        | 9-10                                          |
| Limitations              | 19  | Discuss limitations of the study, taking into account sources of potential bias or imprecision. Discuss both direction and magnitude of any potential bias                                                                                                                                      | 9-10                                          |
| Interpretation           | 20  | Give a cautious overall interpretation of results considering objectives, limitations, multiplicity of analyses, results from similar studies, and other relevant evidence                                                                                                                      | 9-10                                          |
| Generalisability         | 21  | Discuss the generalisability (external validity) of the study results                                                                                                                                                                                                                           | 9-10                                          |
| <b>Other information</b> |     |                                                                                                                                                                                                                                                                                                 |                                               |
| Funding                  | 22  | Give the source of funding and the role of the funders for the present study and, if applicable, for the original study on which the present article is based                                                                                                                                   | 2 & 11                                        |

\*Give information separately for cases and controls in case-control studies and, if applicable, for exposed and unexposed groups in cohort and cross-sectional studies.

**Note:** An Explanation and Elaboration article discusses each checklist item and gives methodological background and published examples of transparent reporting. The STROBE checklist is best used in conjunction with this article (freely

1  
2 available on the Web sites of PLoS Medicine at <http://www.plosmedicine.org/>, Annals of Internal Medicine at  
3 <http://www.annals.org/>, and Epidemiology at <http://www.epidem.com/>). Information on the STROBE Initiative is  
4 available at [www.strobe-statement.org](http://www.strobe-statement.org).  
5  
6  
7  
8  
9  
10  
11  
12  
13  
14  
15  
16  
17  
18  
19  
20  
21  
22  
23  
24  
25  
26  
27  
28  
29  
30  
31  
32  
33  
34  
35  
36  
37  
38  
39  
40  
41  
42  
43  
44  
45  
46  
47  
48  
49  
50  
51  
52  
53  
54  
55  
56  
57  
58  
59  
60

For peer review only



# BMJ Open

## Family satisfaction with critical care in the United Kingdom: a multi-centre cohort study

|                                 |                                                                                                                                                                                                                                                                                                                                                                                                                                                                                                                                                                                                                                                                                                                                                                                                                                                                                                                                                                                                                                                                                                                     |
|---------------------------------|---------------------------------------------------------------------------------------------------------------------------------------------------------------------------------------------------------------------------------------------------------------------------------------------------------------------------------------------------------------------------------------------------------------------------------------------------------------------------------------------------------------------------------------------------------------------------------------------------------------------------------------------------------------------------------------------------------------------------------------------------------------------------------------------------------------------------------------------------------------------------------------------------------------------------------------------------------------------------------------------------------------------------------------------------------------------------------------------------------------------|
| Journal:                        | <i>BMJ Open</i>                                                                                                                                                                                                                                                                                                                                                                                                                                                                                                                                                                                                                                                                                                                                                                                                                                                                                                                                                                                                                                                                                                     |
| Manuscript ID                   | bmjopen-2019-028956.R1                                                                                                                                                                                                                                                                                                                                                                                                                                                                                                                                                                                                                                                                                                                                                                                                                                                                                                                                                                                                                                                                                              |
| Article Type:                   | Research                                                                                                                                                                                                                                                                                                                                                                                                                                                                                                                                                                                                                                                                                                                                                                                                                                                                                                                                                                                                                                                                                                            |
| Date Submitted by the Author:   | 28-May-2019                                                                                                                                                                                                                                                                                                                                                                                                                                                                                                                                                                                                                                                                                                                                                                                                                                                                                                                                                                                                                                                                                                         |
| Complete List of Authors:       | Ferrando, Paloma; Intensive Care National Audit and Research Centre, Gould, Doug; Intensive Care National Audit and Research Centre Walmsley, Emma; Intensive Care National Audit and Research Centre Richards-Belle, Alvin; Intensive Care National Audit and Research Centre Canter, Ruth; Intensive Care National Audit and Research Centre Saunders, Steven; Intensive Care National Audit and Research Centre Harrison, David; Intensive Care National Audit and Research Centre Harvey, Sheila; London School of Hygiene & Tropical Medicine, Global Health and Development Heyland, Daren; Kingston General Hospital, Clinical Evaluation Research Unit; Queens University, Department of Medicine Hinton, Lisa; University of Oxford, Health Experiences Research Group, Nuffield Department of Primary Care Health Sciences McColl, Elaine; Newcastle Clinical Trials Unit Richardson, Annette; Freeman Hospital, Perioperative and Critical Care Richardson, Michael Wright, Stephen; Freeman Hospital, Perioperative and Critical Care Rowan, Kathryn; Intensive Care National Audit and Research Centre |
| <b>Primary Subject Heading</b>: | Intensive care                                                                                                                                                                                                                                                                                                                                                                                                                                                                                                                                                                                                                                                                                                                                                                                                                                                                                                                                                                                                                                                                                                      |
| Secondary Subject Heading:      | Patient-centred medicine                                                                                                                                                                                                                                                                                                                                                                                                                                                                                                                                                                                                                                                                                                                                                                                                                                                                                                                                                                                                                                                                                            |
| Keywords:                       | Adult intensive & critical care < ANAESTHETICS, Quality in health care < HEALTH SERVICES ADMINISTRATION & MANAGEMENT, Family satisfaction                                                                                                                                                                                                                                                                                                                                                                                                                                                                                                                                                                                                                                                                                                                                                                                                                                                                                                                                                                           |
|                                 |                                                                                                                                                                                                                                                                                                                                                                                                                                                                                                                                                                                                                                                                                                                                                                                                                                                                                                                                                                                                                                                                                                                     |

SCHOLARONE™  
Manuscripts

## Family satisfaction with critical care in the United Kingdom: a multi-centre cohort study

### Authors

Paloma Ferrando-Vivas, *statistician*<sup>1</sup>, Doug W Gould, *senior researcher*<sup>1</sup>, Emma Walmsley, *study co-ordinator*<sup>1</sup>, Alvin Richards-Belle, *trial manager*<sup>1</sup>, Ruth R Canter, *research assistant*<sup>1</sup>, Steven Saunders, *research administrator*<sup>1</sup>, David A Harrison, *head statistician*<sup>1</sup>, Sheila E Harvey, *Associate Professor*<sup>2</sup>, Daren K Heyland, *director of the Kingston General Hospital Clinical Evaluation Research Unit and professor of medicine and epidemiology*<sup>3</sup>, Lisa Hinton, *senior qualitative researcher*<sup>4</sup>, Elaine McColl, *director of Newcastle CTU and professor of health services research*<sup>5</sup>, Annette Richardson, *nurse consultant in critical care*<sup>6</sup>, Michael Richardson, *patient public representative*<sup>7</sup>, Stephen E Wright, *consultant in anaesthesia and intensive care*<sup>6</sup>, Kathryn M Rowan, *director of scientific & strategic development*<sup>1</sup>.

<sup>1</sup>Intensive Care National Audit & Research Centre (ICNARC), London, United Kingdom, WC1V 6AZ

<sup>2</sup>London School of Hygiene & Tropical Medicine, Global Health and Development, London, United Kingdom

<sup>3</sup>Kingston General Hospital, Clinical Evaluation Research Unit, Kingston, Canada and Queen's University, Department of Medicine, School of Medicine, Canada.

<sup>4</sup> University of Oxford, Health Experiences Research Group, Nuffield Department of Primary Care Health Sciences, Oxford, United Kingdom.

<sup>5</sup>Newcastle Clinical Trials Unit, Newcastle University, Newcastle upon Tyne, United Kingdom.

<sup>6</sup>Freeman Hospital, Perioperative and Critical Care, Newcastle Upon Tyne Hospitals NHS Foundation Trust, Newcastle upon Tyne, United Kingdom.

<sup>7</sup>Newcastle Upon Tyne, United Kingdom.

### Corresponding author:

Kathryn M. Rowan (ORCID iD: 0000 0001 8217 5602), Director of Scientific & Strategic Development, Intensive Care National Audit & Research Centre, Napier House, 24 High Holborn, London WC1V 6AZ  
Tel: 020 7831 6878  
Fax: 020 7831 6879  
e-mail: [Kathy.rowan@icnarc.org](mailto:Kathy.rowan@icnarc.org)

## Abstract

**Objective:** To assess family satisfaction with intensive care units (ICUs) in the United Kingdom using the Family Satisfaction in the Intensive Care Unit 24-item questionnaire (FS-ICU-24), and to investigate how characteristics of patients and their family members impact on family satisfaction.

**Design:** Prospective cohort study nested within a national clinic audit database.

**Setting:** Stratified, random sample of 20 adult general ICUs participating in the Intensive Care Audit & Research Centre (ICNARC) Case Mix Programme.

**Participants:** Family members of patients staying at least 24 hours in ICU were recruited between May 2013 and June 2014.

**Interventions:** Consenting family members were sent a postal questionnaire three weeks after the patient died or was discharged from ICU. Up to four family members were recruited per patient.

**Main outcome measures:** Family satisfaction measured using the UK FS-ICU-24 questionnaire.

**Main Results:** 12,346 family members of 6,380 patients were recruited and 7,173 (58%) family members of 4,615 patients returned a completed questionnaire. Overall and domain specific family satisfaction scores were high (mean overall family satisfaction 80, satisfaction with care 83, satisfaction with information 76, and satisfaction with decision-making 73 out of 100) but varied significantly across adult general ICUs studied and by whether the patient survived ICU. For family members of ICU survivors, characteristics of both family member (age, ethnicity, relationship to patient (next-of-kin and/or lived with patient) and visit frequency) and the patient (acute severity of illness and receipt of invasive mechanical ventilation) were significant determinants of family satisfaction, whereas, for family members of ICU non-survivors, only patient characteristics (age, acute severity of illness, and duration of stay) were significant.

**Conclusions:** Overall family satisfaction in UK adult general ICUs was high but varied significantly. Adjustment for differences in family member/patient characteristics is important to avoid falsely identifying ICUs as outliers.

**Study registration:** ISRCTN 47363549

1  
2  
3 **Keywords:** critical care; intensive care units; personal satisfaction; family; quality of care;  
4 communication  
5  
6  
7  
8  
9

### Strengths and limitations of this study

- This is the largest study assessing family satisfaction with ICU care.
- Unbiased selection and stratification of participating units ensured geographical spread (north, south, east, and west England, Wales and Northern Ireland), hospital type (university or non-university) and ICUs of different sizes (large or small – based on number of beds) that recruited for one year to avoid bias from seasonal variation.
- Nesting our study within the Case Mix Programme national clinical audit was efficient and allowed for linkage of family members' to patient data.
- The same mode and timing of delivery of the FS-ICU-24 was employed for family members of ICU survivors and non-survivors, avoiding potential sampling bias and allowing for meaningful comparisons between these groups.
- Despite our very large sample size, we achieved a modest response rate (58%), which was in line with previous published studies.

## Introduction

Humanity of health care, often measured as patient experience, is increasingly seen as one of the three pillars of quality, alongside effectiveness and equity. Eliciting the views and experiences of patients is now seen as essential in delivering a high quality service (1). However, given that approximately 20% of patients admitted to intensive care units (ICUs) die and survivors are often unable to recall their experiences, measuring patient experience in ICU has particular challenges. For this reason, measures of family experience have been developed to help understand the humanity of ICU care.

The most widely validated measure of family experience is the Family Satisfaction in the Intensive Care Unit questionnaire (FS-ICU). This describes satisfaction, overall and in two domains – *satisfaction with care* and *satisfaction with decision making* (2-4). The overall aim of the Family-Reported Experiences Evaluation (FREE) study was to inform the potential routine use of the FS-ICU-24 questionnaire for quality improvement in adult general ICUs in the UK.

This paper reports the results of a large, prospective, multicentre, cohort study describing family satisfaction with ICU care in the UK, investigates how characteristics of patients and their family members impact on family satisfaction, and explores if family satisfaction, varies across ICUs, before and after adjustment for family member and patient characteristics identified as being associated with family satisfaction.

## Methods

This large, prospective, multicentre cohort study was nested in the Intensive Care National Audit & Research Centre (ICNARC) Case Mix Programme (CMP) – the national clinical audit of adult general ICUs in England, Wales and Northern Ireland. A stratified sample of 20 ICUs were selected to ensure geographical spread (north, south, east, and west England, Wales and Northern Ireland), hospital type (university or non-university) and ICUs of different sizes (large or small – based on number of beds) and recruited for one year to avoid bias from seasonal variation. In accordance with care standards for UK ICUs at the time of data collection, nurse/patient ratios were 1:1 and 1:2 for Level 3 (Intensive Care) and Level 2 (High Dependency) patients, respectively. The study was reviewed and approved by the National Research Ethics Service Committee South Central - Berkshire B (reference 13/SC/0037) and was registered prospectively (ISRCTN47363549).

### **Patient and Public Involvement**

Engagement with patient and their family members was vital to ensuring the successful delivery of the FREE study. A former critical care patient and a family member of a former critical care patient were co-investigators on the FREE study and contributed to all aspects of the study including: design; conduct; management; analysis; interpretation of results; and dissemination as members of the study management group. Additionally, the study steering committee included patient and family members.

### **Recruitment and follow-up**

Recruitment and follow-up of family members have been described in detail elsewhere (5). Briefly, a 'family member' was defined as any person with close familial, social or emotional relationship to the patient and was not restricted solely to next-of-kin. Up to four family members of patients who spent  $\geq 24$  hours in ICU were eligible to participate if they met the following criteria: aged  $\geq 18$  years; had physically visited the patient's bedside at least once after the first 24 hours; had a UK postal address; and had not already been recruited into the study.

Patients were followed-up to ICU discharge. Approximately three weeks after the patient had either been discharged from or died in the ICU, a questionnaire pack was mailed to their recruited and consented family member(s) direct from the ICNARC Clinical Trials Unit. Data from completed questionnaires were entered centrally onto a secure database. All identifiable information such as names (e.g. of patients, family members, and critical care staff members) were removed. Quality checking of entered data was conducted and, for a 20% random sample, accuracy was verified. All fields in the database with missing data were verified against the paper questionnaires.

### **Statistical analysis**

Item responses were rescaled and, where relevant, reversed, according to the developer's rules, so that each response was on a scale from 0 (least satisfied) to 100 (most satisfied) (4). Recent work from our group (6) established the construct validity of the FS-ICU 24-item questionnaire (FS-ICU-24) was improved by using three domains (splitting the *satisfaction with decision making* domain into two – *satisfaction with information* and *satisfaction with decision making process*). Overall family satisfaction score and three domain scores were calculated by averaging the item responses for the relevant items.

Family member and patient characteristics were described by mean and standard deviation (SD), median and quartiles, or number and percentage stratified by the patient outcome (alive/dead).

Variation in family satisfaction was analysed across the following factors: patient; family member; ICU/hospital (hospital teaching status and number of beds in the ICU); and other contextual. These factors were then explored using univariable and multivariable multilevel linear regression models (7) with a primary outcome of the overall family satisfaction score. In secondary analyses, separate models were fitted for the three individual domains of family satisfaction. Separate models were fitted for family members of ICU survivors and non-survivors. After modelling, the normality of error assumption was assessed by measurements of skewness. Normal probability plots were also used to assess the distribution of residuals at each level. As a sensitivity analysis we ran a multilevel regression model on the square root of the score using the same set of variables to confirm inference. All analyses were conducted in Stata/SE Version 13.0 (StataCorp, College Station, TX).

Variation in family satisfaction across ICUs was assessed graphically using funnel plots, which plot the average family satisfaction score for each critical care unit against the number of family members returning questionnaires. Control limits placed at 2 and 3 SDs around the overall mean indicate the regions of the funnel within which we would expect 95% and 99.8% of points to lie if all variation was due to chance (8).

Due to the natural structure of the data and the planned analysis multilevel multiple imputation (MLMI) was used to complete non- and partial responses for outcomes and family member characteristics. Data were imputed using REALCOM-Impute, an MLwiN 2.15 macro that generates imputations for hierarchical data (9). To test whether our findings were influenced by using imputed data, we also conducted sensitivity analyses using a traditional approach to scoring the FS-ICU-24 by including only responders with  $\geq 60\%$  of items completed.

## Results

Of the 210 adult, general ICUs participating in the CMP, 142 (67.6%) expressed an interest in participating and the 20 ICUs were selected using stratified, random sampling. The characteristics and outcomes of all admissions to the study ICUs were similar to admissions to all ICUs in the CMP during the same period (Supplementary Table S1).

Between 28 May 2013 and 30 June 2014, 18,757 patients were admitted to the 20 ICUs, of which 12,730 patients stayed at least 24 hours in the ICU. From these, 12,346 family members of 6380 patients were recruited. Fully or partially completed questionnaires were returned by 7173 family members of 4615 patients. Family members of patients for whom no CMP data were available were not included, so finally, 7019 were included in the final analysis (Supplementary Figure S1).

Response rates varied by family member characteristics, including; age, gender, ethnicity, level of deprivation (based on residential postcode), level of education, and relationship with the patient. Family members documented in ICU records as next-of-kin were more likely to complete the questionnaire than those who were not, whilst family members for whom English was their first language were more likely to complete the questionnaire than those for whom it was not (Table S2).

A detailed description of the inclusion process, response rates and responders' characteristics has been reported in Family Reported Experiences Evaluation (FREE) study (5). Comparisons of family member and patient characteristics for ICU survivors and non-survivors are presented in Table 1 and Table 2, respectively.

Table 1 Family member characteristics stratified by the patient's ICU outcome

| Family member characteristics                            | All Family members<br>[N=7,019] | Family members of ICU survivors<br>[N=6,149] | Family members of ICU non-survivors<br>[N=870] |
|----------------------------------------------------------|---------------------------------|----------------------------------------------|------------------------------------------------|
| Age, mean (SD)                                           | 54 (15.1)                       | 54 (15.0)                                    | 52 (15.2)                                      |
| Age group, n (%)                                         |                                 |                                              |                                                |
| <30                                                      | 507 (7.5)                       | 439 (7.4)                                    | 68 (8.0)                                       |
| 30-39                                                    | 701 (10.3)                      | 595 (10.0)                                   | 106 (12.5)                                     |
| 40-49                                                    | 1,423 (21.0)                    | 1,245 (21.0)                                 | 178 (21.0)                                     |
| 50-59                                                    | 1,614 (23.8)                    | 1,406 (23.7)                                 | 208 (24.6)                                     |
| 60-69                                                    | 1,507 (22.2)                    | 1,334 (22.5)                                 | 173 (20.4)                                     |
| 70-79                                                    | 827 (12.2)                      | 747 (12.6)                                   | 80 (9.5)                                       |
| 80+                                                      | 204 (3.0)                       | 171 (2.9)                                    | 33 (3.9)                                       |
| Sex, n (%)                                               |                                 |                                              |                                                |
| Male                                                     | 2,327 (33.5)                    | 2,052 (33.7)                                 | 275 (31.9)                                     |
| Female                                                   | 4,622 (66.5)                    | 4,034 (66.3)                                 | 588 (68.1)                                     |
| Ethnicity, n (%)                                         |                                 |                                              |                                                |
| White                                                    | 6,555 (94.0)                    | 5,738 (93.9)                                 | 817 (94.6)                                     |
| Asian                                                    | 138 (2.0)                       | 114 (1.9)                                    | 24 (2.8)                                       |
| Black                                                    | 54 (0.8)                        | 50 (0.8)                                     | 4 (0.5)                                        |
| Mixed ethnicity or other ethnic group                    | 88 (1.3)                        | 84 (1.4)                                     | 4 (0.5)                                        |
| Not stated                                               | 139 (2.0)                       | 124 (2.0)                                    | 15 (1.7)                                       |
| Relationship to patient, n (%) ("I am the patient's...") |                                 |                                              |                                                |
| Partner                                                  | 2,096 (29.9)                    | 1,891 (30.8)                                 | 205 (23.6)                                     |
| Child                                                    | 654 (9.3)                       | 1,893 (30.8)                                 | 346 (39.8)                                     |
| Parent                                                   | 2,239 (31.9)                    | 622 (10.1)                                   | 32 (3.7)                                       |
| Sibling                                                  | 704 (10.0)                      | 624 (10.1)                                   | 80 (9.2)                                       |
| Other relative                                           | 969 (13.8)                      | 799 (13.0)                                   | 170 (19.5)                                     |
| Other non-relative                                       | 356 (5.1)                       | 319 (5.2)                                    | 37 (4.3)                                       |
| Next-of-kin, n (%)                                       | 3,520 (50.2)                    | 3,153 (51.4)                                 | 367 (42.3)                                     |
| Lives with patient, n (%)                                | 2,559 (36.5)                    | 2,311 (37.6)                                 | 248 (28.5)                                     |
| Highest level of education, n (%)                        |                                 |                                              |                                                |



|                                                      |                 |              |            |
|------------------------------------------------------|-----------------|--------------|------------|
| NVQ level 1 or 2                                     | 1,683 (28.9)    | 1,465 (28.9) | 218 (29.1) |
| NVQ level 3                                          | 1,123 (19.3)    | 989 (19.5)   | 134 (17.9) |
| NVQ level 4 or 5                                     | 1,769 (30.4)    | 1,537 (30.3) | 232 (31.0) |
| Other                                                | 1,244 (21.4)    | 1,080 (21.3) | 164 (21.9) |
| Quintile of deprivation, n (%)                       |                 |              |            |
| 1 (least deprived)                                   | 1,190 (17.1)    | 1,164 (19.9) | 159 (19.4) |
| 2                                                    | 1,405 (20.2)    | 1,281 (21.9) | 181 (22.1) |
| 3                                                    | 1,488 (21.4)    | 1,238 (21.1) | 181 (22.1) |
| 4                                                    | 1,488 (21.4)    | 1,189 (20.3) | 169 (20.7) |
| 5 (most deprived)                                    | 1,391 (20.0)    | 989 (16.9)   | 128 (15.6) |
| Distance (km) from home to hospital, median (IQR)    | 12.4 (5.4 33.6) | 12 (6, 34)   | 12 (5, 33) |
| Previous experience of ICU as a family member, n (%) | 1,841 (26.6)    | 1,641 (27.1) | 200 (23.3) |
| Frequent visitor, n (%)                              | 5,403 (78.9)    | 4,713 (78.6) | 690 (81.2) |

NVQ, National Vocational Qualification level 1 or 2, equivalent to GCSE or O-level (school exams taken at age 16); NVQ level 3, equivalent to A-level, AS-level or High School Certificate (school exams taken at age 18); NVQ level 4 or 5, equivalent to degree, Higher degree, Higher National Certificate, Higher National Diploma.

Table 2 Patient characteristics stratified by ICU outcome

| Patient characteristics               | All patients<br>[N=4,506] | ICU survivors<br>[N=4,007] | ICU non-survivors<br>[N=499] |
|---------------------------------------|---------------------------|----------------------------|------------------------------|
| Age, mean (SD)                        | 63 (17.0)                 | 63 (17.3)                  | 68 (13.2)                    |
| Age group, n (%)                      |                           |                            |                              |
| <30                                   | 254 (5.6)                 | 246 (6.1)                  | 8 (1.6)                      |
| 30-39                                 | 232 (5.1)                 | 223 (5.6)                  | 9 (1.8)                      |
| 40-49                                 | 412 (9.1)                 | 384 (9.6)                  | 28 (5.6)                     |
| 50-59                                 | 643 (14.3)                | 586 (14.6)                 | 57 (11.4)                    |
| 60-69                                 | 1,100 (24.4)              | 966 (24.1)                 | 134 (26.9)                   |
| 70-79                                 | 1,159 (25.7)              | 1,003 (25.0)               | 156 (31.3)                   |
| 80+                                   | 706 (15.7)                | 599 (14.9)                 | 107 (21.4)                   |
| Sex, n (%)                            |                           |                            |                              |
| Male                                  | 2,561 (56.8)              | 2,264 (56.5)               | 297 (59.5)                   |
| Female                                | 1,945 (43.2)              | 1,743 (43.5)               | 202 (40.5)                   |
| Ethnicity, n (%)                      |                           |                            |                              |
| White                                 | 4,176 (92.7)              | 3,706 (92.5)               | 470 (94.2)                   |
| Asian or Asian British                | 81 (1.8)                  | 69 (1.7)                   | 12 (2.4)                     |
| Black or black British                | 42 (0.9)                  | 39 (1.0)                   | 3 (0.6)                      |
| Mixed ethnicity or other ethnic group | 79 (1.8)                  | 74 (1.8)                   | 5 (1.0)                      |
| Not stated                            | 128 (2.8)                 | 119 (3.0)                  | 9 (1.8)                      |
| Quintile of deprivation, n (%)        |                           |                            |                              |
| 1 (least deprived)                    | 774 (17.3)                | 690 (17.4)                 | 84 (17)                      |
| 2                                     | 905 (20.3)                | 812 (20.4)                 | 93 (18.8)                    |
| 3                                     | 928 (20.8)                | 822 (20.7)                 | 106 (21.4)                   |
| 4                                     | 950 (21.3)                | 841 (21.2)                 | 109 (22)                     |

|                                                                                                 |                                          |                |                 |
|-------------------------------------------------------------------------------------------------|------------------------------------------|----------------|-----------------|
| 5 (most deprived)                                                                               | 912 (20.4)                               | 809 (20.4)     | 103 (20.8)      |
| Distance (km) from home to hospital,<br>median (IQR)                                            | 33.1 (67.8) 9.3<br>(4.3 19.9)<br>[4,475] | 10 (4, 20)     | 8 (4, 16)       |
| APACHE II severe co-morbidities, n (%)                                                          |                                          |                |                 |
| Liver                                                                                           | 124 (2.8)                                | 94 (2.3)       | 30 (6.0)        |
| Renal                                                                                           | 108 (2.4)                                | 97 (2.4)       | 11 (2.2)        |
| Respiratory                                                                                     | 146 (3.2)                                | 119 (3.0)      | 27 (5.4)        |
| Cardiovascular                                                                                  | 117 (2.6)                                | 100 (2.5)      | 17 (3.4)        |
| Metastatic cancer                                                                               | 121 (2.7)                                | 110 (2.7)      | 11 (2.2)        |
| Haematological malignancy                                                                       | 103 (2.3)                                | 81 (2.0)       | 22 (4.4)        |
| Immunocompromise                                                                                | 369 (8.2)                                | 318 (7.9)      | 51 (10.2)       |
| Prior dependency, n (%)                                                                         |                                          |                |                 |
| Able to live without assistance                                                                 | 3,267 (72.5)                             | 2,944 (73.5)   | 323 (64.7)      |
| Minor or major assistance                                                                       | 1,171 (26.0)                             | 1,004 (25.1)   | 167 (33.5)      |
| Total assistance                                                                                | 47 (1.0)                                 | 42 (1.0)       | 5 (1.0)         |
| Unknown                                                                                         | 21 (0.5)                                 | 17 (0.4)       | 4 (0.8)         |
| Surgical status <i>n</i> (%)                                                                    |                                          |                |                 |
| Non-surgical                                                                                    | 2,808 (62.3)                             | 2,396 (59.8)   | 412 (82.6)      |
| Planned admission following elective or<br>scheduled surgery                                    | 702 (15.6)                               | 686 (17.1)     | 16 (3.2)        |
| Unplanned admission following surgery<br>of any urgency                                         | 996 (22.1)                               | 925 (23.1)     | 71 (14.2)       |
| ICNARC Physiology Score, mean (SD)                                                              | 18 (8.3)                                 | 18 (7.9)       | 26 (8.1)        |
| APACHE II Score, mean (SD)                                                                      | 17 (6.3)                                 | 16 (6.1)       | 21 (6.2)        |
| ICU length of stay (days), median (IQR)                                                         | 4.9 (2.9 9.1)                            | 4.8 (2.8, 9.0) | 6.0 (3.6, 10.6) |
| Organ support received in the ICU, n (%)                                                        |                                          |                |                 |
| Advanced respiratory support                                                                    | 2,540 (56.4)                             | 2,124 (53.0)   | 416 (83.4)      |
| Advanced cardiovascular support                                                                 | 1,325 (29.4)                             | 1,037 (25.9)   | 288 (57.7)      |
| Renal support                                                                                   | 691 (15.3)                               | 510 (12.7)     | 181 (36.3)      |
| Neurological support <sup>a</sup>                                                               | 617 (13.7)                               | 503 (12.6)     | 114 (22.8)      |
| Duration (calendar days) of organ support<br>among those receiving the support,<br>median (IQR) |                                          |                |                 |
| Advanced respiratory support                                                                    | 5.0 (2.0 9.0)                            | 4 (2, 9)       | 6 (4, 10)       |
| Advanced cardiovascular support                                                                 | 3.0 (2.0 4.0)                            | 2 (2, 4)       | 3 (2, 5)        |
| Renal support                                                                                   | 4.0 (3.0 8.0)                            | 4 (3, 8)       | 4 (3, 8)        |
| Neurological support                                                                            | 3.0 (2.0 7.0)                            | 3 (2, 7)       | 3 (2, 5)        |
| Death before acute hospital discharge, n<br>(%)                                                 | 852 (19.2)                               | 353 (8.9)      | N/A             |

<sup>a</sup> including admission receiving invasive neurological monitoring or treatment, continuous intravenous medication for seizures and/or cerebral monitoring, and therapeutic hypothermia using protocols and devices

Both overall and individual domain scores revealed generally high satisfaction (Table 3), however a long tail was present indicating some questionnaires were returned with very low scores (Figure 1). Family members of ICU non-survivors had higher scores for overall satisfaction and satisfaction with the decision-making process domain than family members of ICU survivors.

Table 3 Overall family satisfaction score for all family members and for family members by patient outcome

| Summary measures                                                  | All family members<br>[N=7,017 <sup>a</sup> ] | Family members of ICU<br>survivors [N=6,147 <sup>a</sup> ] | Family members of<br>ICU non-survivors<br>[N=870] |
|-------------------------------------------------------------------|-----------------------------------------------|------------------------------------------------------------|---------------------------------------------------|
| <i>Overall family satisfaction score</i>                          |                                               |                                                            |                                                   |
| <b>Median [IQR]</b>                                               | 83.3 [70.4, 93.0]                             | 82.7 [69.9, 92.7]                                          | 87.1 [74.4, 94.8]                                 |
| <b>Mean (SD)</b>                                                  | 79.7 (16.7)                                   | 79.3 (16.5)                                                | 82.0 (17.5)                                       |
| <b>[95% CI]</b>                                                   | [79.2 - 80.1]                                 | [78.9 - 79.8]                                              | [80.9 - 83.2]                                     |
| <i>Satisfaction with care domain score</i>                        |                                               |                                                            |                                                   |
| <b>Median [IQR]</b>                                               | 87.5 [74.3, 96.4]                             | 87.5 [73.6, 96.4]                                          | 88.1 [76.8, 96.4]                                 |
| <b>Mean (SD)</b>                                                  | 83.1 (16.0)                                   | 83.0 (15.9)                                                | 83.8 (16.9)                                       |
| <b>[95% CI]</b>                                                   | [82.7 - 83.4]                                 | [82.6 - 83.4]                                              | [82.7 - 84.9]                                     |
| <i>Satisfaction with information domain score</i>                 |                                               |                                                            |                                                   |
| <b>Median [IQR]</b>                                               | 79.2 [66.7, 95.8]                             | 79.2 [62.5, 95.8]                                          | 83.3 [70.8, 100.0]                                |
| <b>Mean (SD)</b>                                                  | 76.2 (22.0)                                   | 75.7 (22.0)                                                | 79.6 (22.9)                                       |
| <b>[95% CI]</b>                                                   | [75.7 - 76.7]                                 | [75.1 - 76.2]                                              | [78.1 - 81.0]                                     |
| <i>Satisfaction with the decision-making process domain score</i> |                                               |                                                            |                                                   |
| <b>Median [IQR]</b>                                               | 75.6 [59.3, 93.1]                             | 75.0 [57.5, 88.8]                                          | 87.5 [68.8, 100.0]                                |
| <b>Mean (SD)</b>                                                  | 73.1 (22.3)                                   | 72.1 (22.0)                                                | 79.6 (22.9)                                       |
| <b>[95% CI]</b>                                                   | [72.5 - 73.6]                                 | [71.6 - 72.7]                                              | [78.1 - 81.1]                                     |

<sup>a</sup> Two family members returned questionnaires but did not complete any of the 24 FS-ICU items – responses were not imputed for these family members.

Univariable analyses of the association between family satisfaction and family characteristics, patient characteristics, ICU/hospital characteristics and contextual factors are shown in the Supplementary Appendix (Table S3-S5). Family member level and patient level variables that were statistically significant along with the a priori key family member/patient variables (age, sex), were carried forward to the multivariable multilevel modelling process (5). There was no evidence of differences in family satisfaction according to hospital teaching status or the number of beds in the ICU, however, these variables were retained in the multilevel multivariable models due to their controlling effect on the other coefficients in the models. A summary of the candidate considered in the models and a justification of their inclusion/exclusion is detailed in Table S6.

Results of the multivariable multilevel models for overall family satisfaction are shown in

Table 4. Among family members of ICU survivors, there was evidence of an association with overall family satisfaction for: family member age group; family member ethnicity; next-of-kin/lives with patient; frequency of visits; ICNARC Physiology Score; and receipt of advanced respiratory support. Among family members of non-survivors, only the following patient factors were significant: patient age; ICNARC Physiology Score; and ICU length of stay. These associations were significant when controlling for other predictors in the model. A priori-specified interaction terms and random slopes did not improve the fit of the models and so these terms were not retained.

Table 4 Multivariable multilevel models for overall family satisfaction score

| Variables                                      | Family members of ICU survivors<br>[N=6,143 <sup>a</sup> ] |                |         | Family members of ICU non-survivors<br>[N=869 <sup>a</sup> ] |                |         |
|------------------------------------------------|------------------------------------------------------------|----------------|---------|--------------------------------------------------------------|----------------|---------|
|                                                | Coef.                                                      | 95% CI         | p-value | Coef.                                                        | 95% CI         | p-value |
| Fixed effects – family member level            |                                                            |                |         |                                                              |                |         |
| Constant                                       | 68.30                                                      | (63.42, 73.17) |         | 55.70                                                        | (42.26, 69.14) |         |
| Family member age, years (vs <30)              |                                                            |                | 0.041   |                                                              |                | 0.18    |
| 30-39                                          | 1.97                                                       | (0.11, 3.82)   |         | 2.01                                                         | (-2.64, 6.66)  |         |
| 40-49                                          | 1.65                                                       | (0.02, 3.29)   |         | 3.37                                                         | (-1.01, 7.75)  |         |
| 50-59                                          | 1.96                                                       | (0.35, 3.56)   |         | 4.12                                                         | (-0.09, 8.33)  |         |
| 60-69                                          | 1.35                                                       | (-0.31, 3.01)  |         | 4.26                                                         | (-0.25, 8.79)  |         |
| 70-79                                          | 1.32                                                       | (-0.52, 3.17)  |         | 5.92                                                         | (0.69, 11.14)  |         |
| 80+                                            | -1.34                                                      | (-4.06, 1.37)  |         | -0.18                                                        | (-6.80, 6.43)  |         |
| Family member sex – female (vs male)           | 0.32                                                       | (-0.48, 1.12)  | 0.44    | 0.66                                                         | (-1.45, 2.77)  | 0.54    |
| Family member ethnicity – white (vs non-white) | 3.59                                                       | (1.38, 5.80)   | 0.001   | 7.12                                                         | (-0.00, 14.25) | 0.050   |

|                                                        |       |                |        |       |                |        |
|--------------------------------------------------------|-------|----------------|--------|-------|----------------|--------|
| Next-of-kin/lives with patient (vs lives with patient) |       |                | <0.001 |       |                | 0.26   |
| Next-of-kin, does not live with patient                | -1.39 | (-2.56, -0.22) |        | 1.08  | (-2.39, 4.55)  |        |
| Not next-of-kin, does not live with patient            | -2.33 | (-3.26, -1.41) |        | -1.24 | (-3.88, 1.40)  |        |
| Frequent visitor                                       | 2.83  | (1.82, 3.84)   | <0.001 | 1.53  | (-1.34, 4.39)  | 0.30   |
| Fixed effects – patient level                          |       |                |        |       |                |        |
| Patient age (per 10 years)                             | 0.01  | (-0.28, 0.31)  | 0.93   | 1.18  | (0.09, 2.27)   | 0.033  |
| Patient sex – female (vs male)                         | 0.26  | (-0.73, 1.25)  | 0.61   | 1.92  | (-0.85, 4.70)  | 0.17   |
| Dependency (vs none)                                   |       |                | 0.15   |       |                | 0.74   |
| Minor or major                                         | -0.30 | (-1.60, 1.00)  |        | -0.22 | (-3.36, 2.92)  |        |
| Total                                                  | -4.62 | (-9.32, 0.07)  |        | 4.98  | (-8.10, 18.07) |        |
| Surgical status (vs non-surgical)                      |       |                | 0.63   |       |                | 0.82   |
| Planned elective/scheduled                             | -0.74 | (-2.24, 0.77)  |        | -2.61 | (-10.77, 5.54) |        |
| Unplanned                                              | -0.26 | (-1.46, 0.94)  |        | -0.08 | (-3.95, 3.80)  |        |
| ICNARC Physiology Score (per point)                    | 0.16  | (0.09, 0.24)   | <0.001 | 0.17  | (0.00, 0.34)   | 0.045  |
| ICU length of stay (per day)                           | -0.02 | (-0.07, 0.03)  | 0.44   | -0.30 | (-0.46, -0.15) | <0.001 |
| Advanced respiratory support                           | 2.96  | (1.80, 4.11)   | <0.001 | ---   |                |        |
| Fixed effects – ICU/hospital level                     |       |                |        |       |                |        |
| Hospital type (vs non-university)                      |       |                | 0.49   |       |                | 0.55   |
| University                                             | 0.86  | (-3.61, 5.32)  |        | -1.51 | (-7.51, 4.50)  |        |
| University affiliated                                  | 1.97  | (-1.26, 5.20)  |        | 1.77  | (-2.55, 6.09)  |        |
| Number of ICU beds (per bed)                           | -0.00 | (-0.23, 0.23)  | 0.97   | 0.26  | (-0.08, 0.61)  | 0.13   |
| Random effects – SD (SE)                               |       |                |        |       |                |        |
| Between ICUs                                           | 2.91  | (0.60)         |        | 2.81  | (1.10)         |        |
| Within ICUs between patients                           | 10.94 | (0.29)         |        | 11.16 | (0.69)         |        |
| Within patients between family members                 | 11.98 | (0.21)         |        | 12.26 | (0.44)         |        |
| Variance partition – percentage                        |       |                |        |       |                |        |
| Between ICUs                                           | 3%    |                |        | 2%    |                |        |
| Between patients                                       | 44%   |                |        | 44%   |                |        |

Coef, coefficient; SE, standard error.

<sup>a</sup>Five patients were missing age group on both the questionnaire and web portal – due to the very small amount of missing data in this key variable, these missing values were not imputed.

Variances at both the patient and ICU/hospital levels were statistically significant but the variance partition coefficients (VPCs) at the ICU/hospital level were small in both the null and final multilevel models (4% and 3% for ICU survivors and 2% and 2% for ICU non-survivors, respectively), which

1  
2  
3 means differences in overall family satisfaction scores were mainly at the patient and family member  
4 levels. Variance at the patient level represented 44% of the total variance in overall family  
5 satisfaction in the final models for family members of both ICU survivors and ICU non-survivors.  
6  
7

8  
9 Full results of the multivariable multilevel models for the domain scores are reported in the  
10 Supplementary Appendix (Table S7-S9).  
11

12  
13 Figure 2 shows the funnel plots for the overall family satisfaction score, before and after adjustment  
14 for family member and patient characteristics from the multivariable multilevel models. Adjusting  
15 for family member and patient characteristics reduced the variability across ICUs, resulting in fewer  
16 ICUs outside the funnel plot control limits. Funnel plots for the individual domain scores before and  
17 after adjustment for can be found in the Supplementary Appendix (Figure S2).  
18  
19  
20  
21

### 22 **Sensitivity analyses**

23  
24 Multivariable multilevel models using the square root transformation of the satisfaction scores gave  
25 consistent results. In the models using imputed data, the direction and order of magnitude of  
26 coefficients that were significant were similar to those estimated using the traditional approach to  
27 scoring partially completed questionnaires (Supplementary Appendix, Table S10 and Table S11). On  
28 average, the multiple imputation approach tended to identify larger numbers of potential outliers  
29 due to the larger sample sizes and therefore narrower funnels.  
30  
31  
32  
33  
34  
35  
36  
37

### 38 **Discussion**

39  
40 Overall and domain specific family satisfaction measured with the UK FS-ICU-24 was high. However,  
41 we found that it varies significantly across adult general ICUs and that family members of patients  
42 who died in the ICU had higher levels of satisfaction. For family members of ICU survivors,  
43 characteristics of both family member and the patient were significant determinants of family  
44 satisfaction, whereas, for family members of ICU non-survivors, only patient characteristics were  
45 significant. Adjustment for these family member and patient characteristics reduced the variation in  
46 family satisfaction across ICUs, resulting in fewer ICUs being identified as outliers.  
47  
48  
49  
50

51  
52 The overall satisfaction score was comparable with other published studies employing similar  
53 methods to administer the FS-ICU-24 (10-13). Our findings are also consistent with a study by Wall et  
54 al (14) which identified that families of ICU non-survivors were more satisfied than families of ICU  
55 survivors. Similarly, Stricker et al (15) found that increasing acute severity of illness of the patient  
56 (evaluated using the SAPS II score) was associated with increasing satisfaction on the overall family  
57  
58  
59  
60

1  
2  
3 satisfaction score, however, lower satisfaction was associated with ICU-level characteristics of a  
4 written admission/discharge policy and a higher patient:nurse ratio. Other considered patient  
5 characteristics were found not to be significant.  
6  
7

8  
9 It is of note that one of largest magnitude associations in the FREE study was the finding that white  
10 family members of both ICU survivors and non-survivors had higher satisfaction, on average, than  
11 those of other ethnicities. Further investigation of this issue is warranted to understand whether  
12 this reflects, for example, either cultural variation in family members' expectations or a need to  
13 engage better and communicate with family members who may not have English as their first  
14 language (17% of family members of non-white ethnicity indicated that their first language was not  
15 English compared with less than 1% of those of white ethnicity).  
16  
17  
18  
19  
20

21 Our work has several important strengths. To our knowledge, this is the largest study assessing  
22 family satisfaction with ICU care. Nesting our study within the national clinical audit programme was  
23 efficient and novel and allowed for unbiased selection and stratification of participating units and  
24 linkage of family members' to patient data. One important strength is that the same mode and  
25 timing of delivery of the FS-ICU-24 was employed for family members of ICU survivors and non-  
26 survivors, avoiding potential sampling bias and allowing for meaningful comparisons between these  
27 groups. Finally, the large sample size of family members allowed for robust multilevel multivariable  
28 modelling of factors associated with overall family satisfaction to inform important adjustment of  
29 any future assessment using this questionnaire. Despite our very large sample size, we achieved a  
30 modest response rate (58%), however this was similar to other studies with smaller sample sizes (10,  
31 14).  
32  
33  
34  
35  
36  
37  
38  
39

40 Our study does, however, have limitations. Firstly, when assessing satisfaction, it is not uncommon  
41 for continuous measures to be skewed. Whilst the skewed nature of the satisfaction scores does not  
42 affect the parameter estimates in multilevel models (16, 17) it might cause problems when one is  
43 interested in the significance or in the confidence intervals of the variance terms at higher levels  
44 (17). In our analyses, we corrected the asymptotic standard errors using a robust (Huber/White)  
45 estimator to improve inference and performed a sensitivity analysis using a square root  
46 transformation which did not change our conclusions. Secondly, by excluding family members of  
47 patients who had spent less than 24 hours on ICU - to ensure that family members had spent long  
48 enough on ICU to feel able to respond to the questionnaire - we may have missed a small group of  
49 very sick patients who die soon after admission to ICU. Thirdly, there were differences in the case  
50 mix and outcome of patients between those who had at least one family member recruited and  
51 those who did not, leading to potential bias in the results. Fourthly, we found that younger family  
52  
53  
54  
55  
56  
57  
58  
59  
60

1  
2  
3 members and those from ethnic minority groups were less likely to respond and important  
4 information may have been missed. Finally, 94% of patients were of white ethnicity, which is above  
5 that of the ethnic make-up of the UK (87%) and may make the overall family satisfaction scores less  
6 generalisable to other ethnicities.  
7  
8  
9

10  
11 In conclusion, this large, prospective, multicentre cohort study indicated that overall family  
12 satisfaction with adult general ICU care in the UK was high. However, adjustment for differences in  
13 family member/patient characteristics are important to avoid falsely identifying ICUs as outliers.  
14  
15  
16  
17  
18  
19  
20  
21  
22  
23  
24  
25  
26  
27  
28  
29  
30  
31  
32  
33  
34  
35  
36  
37  
38  
39  
40  
41  
42  
43  
44  
45  
46  
47  
48  
49  
50  
51  
52  
53  
54  
55  
56  
57  
58  
59  
60

For peer review only



## Acknowledgements

We wish to thank the NIHR Health Services and Delivery Research programme for funding this project. We also wish to thank all the patients, family members and staff from all the units that participated the study.

### Research staff at sites

C Smalley and R Jacob (Arrowe Park Hospital); S Chau, S A Pearson, K Ellis and R Watmough (Barnsley Hospital); M Faulkner, L Evans and H Robertson (Countess of Chester Hospital); P Wakefield, R Abrahams, N Summers and H Wooldridge (Darent Valley Hospital); H McMillan, S Tyson, K Tantam, S Olver, C Brown and C Tippett (Derriford Hospital); S Moreton, S Jones, A Deeney, J Gibbins and A Oglesby (Dorset County Hospital); C Randell, M Allsop, K Harris, C Scott and C Boyd (Freeman Hospital); E Coughlan, A Jefferies and K Wylie (Manchester Royal Infirmary); C Plowright, C Pegg, L Cooper and T Hatton (Medway Maritime Hospital); P Doble, P Richards, D Bayford and K Adams (Musgrove Park Hospital); J Spimpolo, M Burt and R Pillai (Northampton General Hospital); K A Simeson and S Buckley (Pinderfields Hospital); A Jackson, M Nadolski and H Baker (Royal Devon & Exeter Hospital, Wonford); N Mason, U Gunter and L Roberts (Royal Gwent Hospital); T Evans, E Cooke, M Ogden and P Dark (Salford Royal Hospital); M Cody, F Hogg and D McCahery (South West Acute Hospital); D Dawson, J Mellinghoff, S Prudden, N Poonuth and C Ryan (St George's Hospital); G Mandersloot, A Smith (The Royal London Hospital); S Hagan, L Humphries and E Murphy (Ulster Hospital); E Walker, H Payne and X Zhao (Watford General Hospital); C Edmondson, S Anglesea and H Williams (Wrexham Maelor Hospital).

### Study Steering Committee

Dr Kathleen Daly (independent chair); Andrina Colquoun (independent); Dr Maureen Dalziel; Kirsty Everingham (independent); Doreen Henry (independent); Joan Pearson (independent); Catherine Plowright; Dr Laura Price (independent); Professor Kathryn Rowan; Professor Mervyn Singer (independent); and Dr Stephen Wright.

**Funding:** This project was funded by the National Institute for Health Research (NIHR) Health Services and Delivery Research (HS&DR) Programme (11/2003/56). The funder had no involvement in study design; in collection, analysis and interpretation of data; in the writing of the report; or in the decision to submit the article for publication. The views and opinions expressed therein are those of the authors and do not necessarily reflect those of the HS&DR Programme, NIHR, NHS or the Department of Health.

1  
2  
3 **Competing interests:** Kathryn M Rowan is a member of the NIHR HS&DR Board. Elaine McColl was  
4 an editor for the NIHR Journals Library between 2013 and 2016 and received a fee for this work. The  
5 other authors declare no conflicts of interest. All authors have completed the Unified Competing  
6 Interest form (available on request from the corresponding author).  
7  
8  
9

10 **Data sharing:** data can be obtained from the corresponding author on request  
11  
12

13 **Authors contributions:** KMR as Chief Investigator conceived the idea and designed the study with  
14 DAH, SHE, DKH, LH, EMc, MR, AR, and SEW. EW co-ordinated the study and contributed to data  
15 acquisition with ARB, RRC, SS, SHE, AR, and SEW. PFV, DWG, DAH, SHE, DKH, LH, EMc, MR, SEW, and  
16 KMR were involved in the analysis and interpretation of the results. All authors were involved in  
17 drafting, editing and have approved the final manuscript.  
18  
19  
20  
21  
22  
23  
24  
25  
26  
27  
28  
29  
30  
31  
32  
33  
34  
35  
36  
37  
38  
39  
40  
41  
42  
43  
44  
45  
46  
47  
48  
49  
50  
51  
52  
53  
54  
55  
56  
57  
58  
59  
60

## References

1. Black N, Jenkinson C. Measuring patients' experiences and outcomes. *BMJ*. 2009;339:b2495.
2. Heyland DK, Tranmer JE. Measuring family satisfaction with care in the intensive care unit: the development of a questionnaire and preliminary results. *J Crit Care*. 2001;16(4):142-9.
3. Rothen HU, Stricker KH, Heyland DK. Family satisfaction with critical care: measurements and messages. *Curr Opin Crit Care*. 2010;16(6):623-31.
4. Wall RJ, Engelberg RA, Downey L, et al. Refinement, scoring, and validation of the Family Satisfaction in the Intensive Care Unit (FS-ICU) survey. *Crit Care Med*. 2007;35(1):271-9.
5. Wright SE, Walmsley E, Harvey SE, et al. Family-Reported Experiences Evaluation (FREE) study: a mixed-methods study to evaluate families' satisfaction with adult critical care services in the NHS. *Health Serv Deliv Res*. 2015;3(45).
6. DA H, P F-V, SE W, et al. Psychometric assessment of the Family Satisfaction in the Intensive Care Unit questionnaire in the United Kingdom. *J Crit Care*. 2017;38:346-50.
7. Snijders TAB, Bosker RJ. *Multilevel Analysis: An Introduction to Basic and Advanced Multilevel Modeling*. Thousand Oaks, CA: SAGE Publications; 1999.
8. Spiegelhalter DJ. Funnel plots for comparing institutional performance. *Stat Med*. 2005;24(8):1185-202.
9. Carpenter JR, Goldstein H, Kenward MG. REALCOM-IMPUTE software for multilevel multiple imputation with mixed response types. *Journal of Statistical Software*. 2011;45:5.
10. Dodek PM, Wong H, Heyland DK, et al. The relationship between organizational culture and family satisfaction in critical care. *Crit Care Med*. 2012;40(5):1506-12.
11. Khalaila R. Patients' family satisfaction with needs met at the medical intensive care unit. *Journal of Advanced Nursing*. 2013(69):1172-82.
12. Schwarzkopf D, Behrend S, Skupin H, et al. Family satisfaction in the intensive care unit: a quantitative and qualitative analysis. *Intensive Care Med*. 2013;39(6):1071-9.
13. Tastan S, Iyigun E, Ayhan H, et al. Validity and reliability of Turkish version of family satisfaction in the intensive care unit. *Int J Nurs Pract*. 2014;20(3):320-6.
14. Wall RJ, Curtis JR, Cooke CR, et al. Family satisfaction in the ICU: differences between families of survivors and nonsurvivors. *Chest*. 2007;132(5):1425-33.
15. Stricker KH, Kimberger O, Schmidlin K, et al. Family satisfaction in the intensive care unit: what makes the difference? *Intensive Care Med*. 2009;35(12):2051-9.
16. Gelman A HJ. *Data Analysis Using Regression and Multilevel/Hierarchical Models*. Cambridge: Cambridge University Press; 2007.
17. Maas CJM, Hox JJ. The influence of violations of assumptions on multilevel parameter estimates and their standard errors. *Computational Statistics & Data Analysis*. 2004;46(3):427-40.

1  
2  
3 **Figure legends**  
4

5 Figure 1 Distribution of overall family satisfaction score  
6

7 Figure 2 Variation across ICUs in the mean overall family satisfaction score (A) before and (B) after  
8 adjustment for patient and family member characteristics  
9  
10  
11  
12  
13  
14  
15  
16  
17  
18  
19  
20  
21  
22  
23  
24  
25  
26  
27  
28  
29  
30  
31  
32  
33  
34  
35  
36  
37  
38  
39  
40  
41  
42  
43  
44  
45  
46  
47  
48  
49  
50  
51  
52  
53  
54  
55  
56  
57  
58  
59  
60

For peer review only

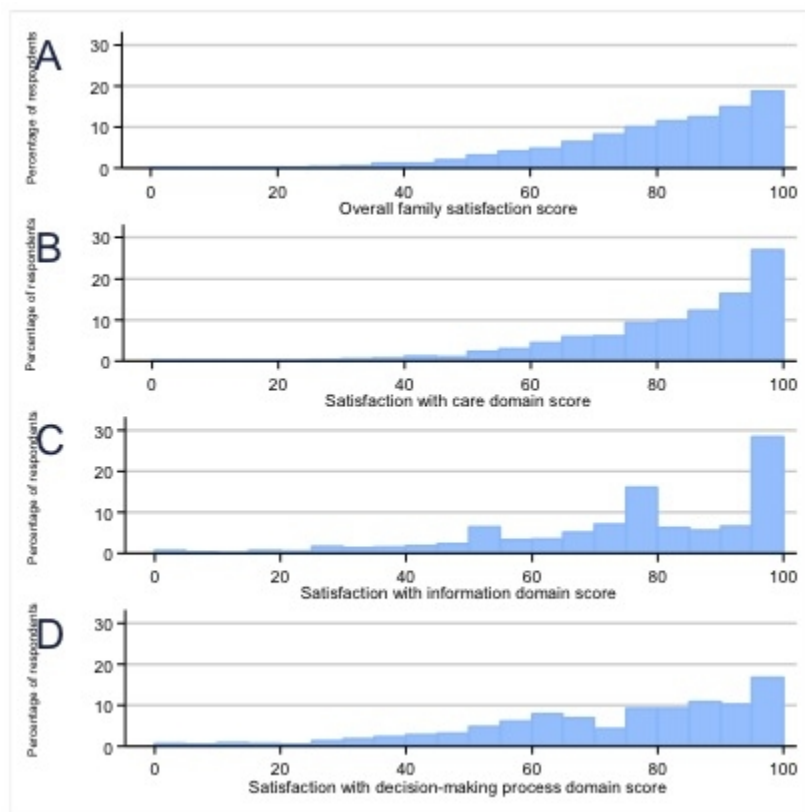

Figure 1 Distribution of overall family satisfaction score

145x145mm (72 x 72 DPI)

1  
2  
3  
4  
5  
6  
7  
8  
9  
10  
11  
12  
13  
14  
15  
16  
17  
18  
19  
20  
21  
22  
23  
24  
25  
26  
27  
28  
29  
30  
31  
32  
33  
34  
35  
36  
37  
38  
39  
40  
41  
42  
43  
44  
45  
46  
47  
48  
49  
50  
51  
52  
53  
54  
55  
56  
57  
58  
59  
60

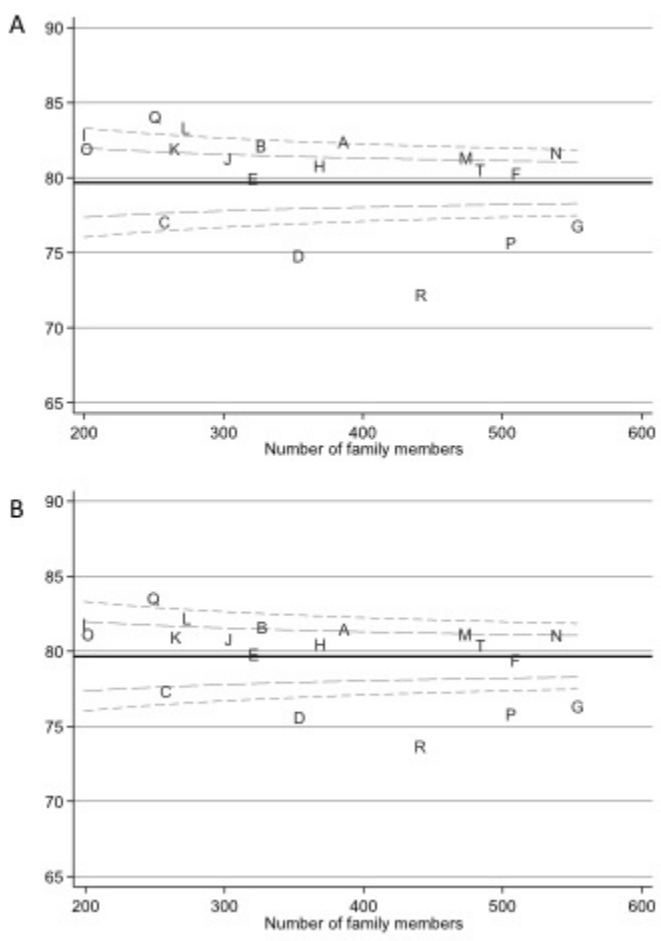

Figure 2 Variation across ICUs in the mean overall family satisfaction score (A) before and (B) after adjustment for patient and family member characteristics

120x172mm (72 x 72 DPI)

**Supplementary material**

Family satisfaction with critical care in the United Kingdom: a multi-centre cohort study

For peer review only

**Table S1** Characteristics and outcomes for all admission to ICUs participating in the FREE study and ICNARC Case Mix Programme

|                                                                     | <b>CMP</b>                              | <b>FREE study</b>                      |
|---------------------------------------------------------------------|-----------------------------------------|----------------------------------------|
| Total number of ICUs [N]                                            | [209] <sup>a</sup>                      | [19] <sup>a</sup>                      |
| Total number of admissions [N]                                      | [149,779]                               | [18,270]                               |
| Age <i>mean</i> (SD)                                                | 61.5 (18.0)                             | 61.5 (18.0)                            |
| Sex <i>male</i> (%)                                                 | 82,444 (55.0)                           | 10,316 (56.5)                          |
| Ethnicity <i>n</i> (%)                                              |                                         |                                        |
| White                                                               | 135,767 (90.6)                          | 16,439 (90.0)                          |
| Asian                                                               | 4,815 (3.2)                             | 439 (2.4)                              |
| Black                                                               | 3,250 (2.2)                             | 327 (1.8)                              |
| Other                                                               | 2,434 (1.6)                             | 445 (2.4)                              |
| Not stated                                                          | 3,513 (2.3)                             | 620 (3.4)                              |
| Distance (km) from patient home to hospital <i>median</i> (IQR) [N] | 25.0 (54.2) 8.7 (3.9 19.3)<br>[128,169] | 31.7 (64.5) 9.2 (4.2 20.8)<br>[18,090] |
| APACHE II severe co-morbidities <i>n</i> (%)                        |                                         |                                        |
| 0                                                                   | 123,437 (82.4)                          | 14,742 (80.7)                          |
| 1                                                                   | 20,906 (14.0)                           | 2,648 (14.5)                           |
| 2                                                                   | 5,053 (3.4)                             | 793 (4.3)                              |
| 3 or more                                                           | 383 (0.3)                               | 87 (0.5)                               |
| Admission type <i>n</i> (%) [N]                                     | [149,765]                               | [18,270]                               |
| Medical                                                             | 87,940 (58.7)                           | 10,039 (54.9)                          |
| Elective surgery                                                    | 34,284 (22.9)                           | 4,761 (26.1)                           |
| Emergency surgery                                                   | 27,541 (18.4)                           | 3,470 (19.0)                           |
| Surgical status of surgical admissions <i>n</i> (%) [N]             | [61,825]                                | [8,231]                                |
| Planned surgery                                                     | 28,267 (45.7)                           | 3,985 (48.4)                           |
| Unplanned surgery                                                   | 33,558 (54.3)                           | 4,246 (51.6)                           |
| ICNARC Physiology Score <i>mean</i> (SD)                            | 16.9 (9.3)                              | 16.5 (9.2)                             |
| ICNARC predicted risk of death <i>median</i> (IQR) [N]              | 0.10 (0.03 0.33)<br>[142,654]           | 0.09 (0.03 0.30) [17,261]              |
| APACHE II Acute Physiology Score <i>mean</i> (SD)                   | 11.4 (6.1)                              | 11.3 (5.9)                             |
| APACHE II Score <i>mean</i> (SD)                                    | 15.7 (7.0)                              | 15.6 (6.9)                             |
| APACHE II predicted risk of death <i>median</i> (IQR) [N]           | 0.12 (0.04 0.29)<br>[132,197]           | 0.11 (0.04 0.28) [16,193]              |
| Mechanical ventilation during first 24 hrs <i>n</i> (%) [N]         | 58,687 (39.4) [148,975]                 | 7,008 (38.5) [18,187]                  |



|                                           |                         |                       |
|-------------------------------------------|-------------------------|-----------------------|
| ICU mortality <i>n</i> (%) [N]            | 21,505 (14.4) [149,779] | 2,560 (14.0) [18,270] |
| Acute hospital mortality <i>n</i> (%) [N] | 29,945 (21.0) [142,670] | 3,550 (20.6) [17,266] |

<sup>a</sup> excludes one ICU for which no CMP data were available

For peer review only

**Figure S1** Overview of patients, family members and questionnaires (distributed/returned)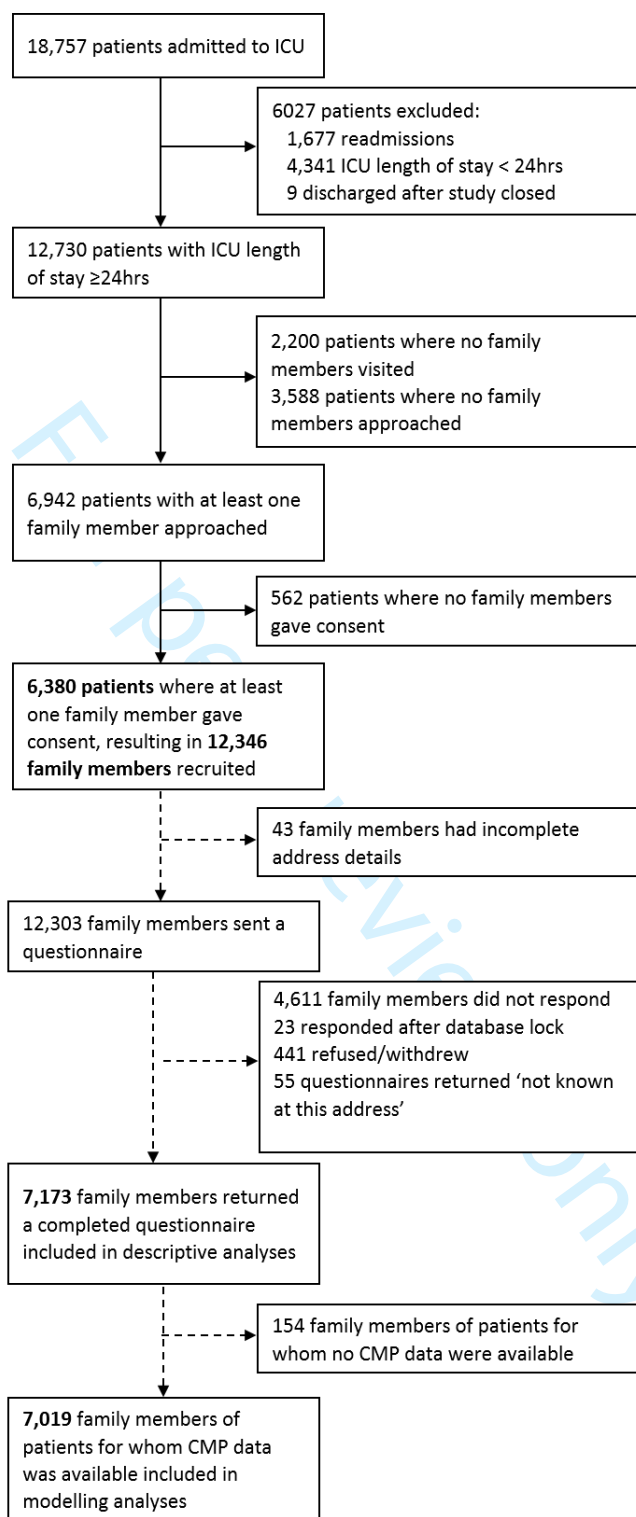**Key**

Recruitment in ICU →

Postal survey - - - - -&gt;

**Table S2** Characteristics of all recruited family members and by response to questionnaire

|                                                                            | <b>All recruited family members</b> | <b>Those returning questionnaires</b> | <b>Did not respond</b>    |
|----------------------------------------------------------------------------|-------------------------------------|---------------------------------------|---------------------------|
| Total number of family members, N                                          | 12 346                              | 7173                                  | 4611                      |
| Age group, <i>n</i> (%) [N]                                                | [12 068]                            | [7019]                                | [4500]                    |
| <30                                                                        | 1429 (11.8)                         | 530 (7.6)                             | 861 (19.1)                |
| 30-39                                                                      | 1590 (13.2)                         | 721 (10.3)                            | 827 (18.4)                |
| 40-49                                                                      | 2760 (22.9)                         | 1465 (20.9)                           | 1208 (26.9)               |
| 50-59                                                                      | 2646 (21.9)                         | 1654 (23.6)                           | 886 (19.7)                |
| 60-69                                                                      | 2131 (17.7)                         | 1580 (22.5)                           | 440 (9.8)                 |
| 70-79                                                                      | 1211 (10.0)                         | 862 (12.3)                            | 220 (4.8)                 |
| 80+                                                                        | 301 (2.5)                           | 207 (2.9)                             | 58 (1.3)                  |
| Sex, <i>n</i> (%) [N]                                                      | [12 145]                            | [7062]                                | [4529]                    |
| Female                                                                     | 7687 (63.3)                         | 4689 (66.4)                           | 2663 (58.8)               |
| Male                                                                       | 4458 (36.7)                         | 2373 (33.6)                           | 1866 (41.2)               |
| Ethnicity, <i>n</i> (%) [N]                                                | [12 090]                            | [7033]                                | [4505]                    |
| White                                                                      | 11 379 (94.1)                       | 6747 (95.9)                           | 4111 (91.3)               |
| Asian                                                                      | 355 (2.9)                           | 142 (2.0)                             | 196 (4.4)                 |
| Black                                                                      | 161 (1.3)                           | 55 (0.8)                              | 101 (2.2)                 |
| Other                                                                      | 195 (1.6)                           | 89 (1.3)                              | 97 (2.1)                  |
| Deprivation, <i>n</i> (%) [N]                                              | [11 740]                            | [6832]                                | [4370]                    |
| 1 [least deprived]                                                         | 2113 (18.0)                         | 1376 (20.1)                           | 634 (14.5)                |
| 2                                                                          | 2406 (20.5)                         | 1502 (22.0)                           | 803 (18.4)                |
| 3                                                                          | 2415 (20.6)                         | 1443 (21.1)                           | 851 (19.5)                |
| 4                                                                          | 2545 (21.7)                         | 1380 (20.2)                           | 1045 (23.9)               |
| 5 [most deprived]                                                          | 2261 (19.3)                         | 1131 (16.6)                           | 1037 (23.7)               |
| Distance (km) from family member home to hospital, <i>median</i> (IQR) [N] | 11.6 (5.1-30.7)<br>[11 803]         | 12.3 (5.3-33.2)<br>[6867]             | 10.7 (4.6-29.4)<br>[4394] |
| Relationship, <i>n</i> (%) [N] "I am the patient's..."                     | [12 343]                            | [7173]                                | [4611]                    |
| Partner                                                                    | 3105 (25.2)                         | 2151 (30.0)                           | 786 (17.0)                |
| Child                                                                      | 4186 (33.9)                         | 2292 (32.0)                           | 1780 (38.6)               |
| Parent                                                                     | 1054 (8.5)                          | 665 (9.3)                             | 338 (7.3)                 |
| Sibling                                                                    | 1271 (10.3)                         | 717 (10.0)                            | 480 (10.4)                |
| Other relative                                                             | 1973 (16.0)                         | 987 (13.8)                            | 898 (19.5)                |
| Other non-relative                                                         | 754 (6.1)                           | 361 (5.0)                             | 329 (7.1)                 |
| Next-of-kin, <i>n</i> (%) [N]                                              | [11 702]                            | [6770]                                | [4389]                    |
| No                                                                         | 7086 (60.6)                         | 3747 (55.3)                           | 3009 (68.6)               |
| Yes                                                                        | 4616 (39.4)                         | 3023 (44.7)                           | 1380 (31.4)               |
| Lives with patient, <i>n</i> (%) [N]                                       | [12 343]                            | [7172]                                | [4609]                    |
| No                                                                         | 8255 (66.9)                         | 4543 (63.3)                           | 3357 (72.8)               |
| Yes                                                                        | 4088 (33.1)                         | 2629 (36.7)                           | 1252 (27.2)               |
| Education level, <i>n</i> (%) [N]                                          | [10 293]                            | [5971]                                | [3888]                    |
| NVQ 1 or 2                                                                 | 3147 (30.6)                         | 1731 (29.0)                           | 1284 (33.0)               |
| NVQ 3                                                                      | 2086 (20.3)                         | 1149 (19.2)                           | 870 (22.4)                |

|                                  |               |              |             |
|----------------------------------|---------------|--------------|-------------|
| NVQ 4 or 5                       | 2936 (28.5)   | 1819 (30.5)  | 1032 (26.5) |
| Other                            | 2124 (20.6)   | 1272 (21.3)  | 702 (18.1)  |
| <hr/>                            |               |              |             |
| First language, <i>n</i> (%) [N] | [12 346]      | [7 173]      | [4611]      |
| Not English                      | 335 (2.7)     | 140 (2.0)    | 182 (3.9)   |
| English                          | 12 011 (97.3) | 7 033 (98.0) | 4429 (96.1) |

For peer review only

**Table S3** Univariable analyses of factors associated with overall family satisfaction score by ICU outcome – family member characteristics

| Variables                                      | Family members of ICU survivors [N=6,147 <sup>a</sup> ] |                |         | Family members of ICU non-survivors [N=870] |                 |         |
|------------------------------------------------|---------------------------------------------------------|----------------|---------|---------------------------------------------|-----------------|---------|
|                                                | Coef.                                                   | 95% CI         | p-value | Coef.                                       | 95% CI          | p-value |
| Age, years (vs < 30)                           |                                                         |                | 0.031   |                                             |                 | 0.033   |
| 30-39                                          | 1.56                                                    | (-0.22, 3.33)  |         | 2.68                                        | (-1.80, 7.17)   |         |
| 40-49                                          | 0.42                                                    | (-0.10, 0.94)  |         | 1.61                                        | (0.21, 3.01)    |         |
| 50-59                                          | 2.12                                                    | (0.61, 3.64)   |         | 5.49                                        | (1.49, 9.50)    |         |
| 60-69                                          | 1.96                                                    | (0.39, 3.52)   |         | 6.01                                        | (1.78, 10.25)   |         |
| 70-79                                          | 1.98                                                    | (0.28, 3.68)   |         | 7.39                                        | (2.58, 12.19)   |         |
| 80+                                            | -0.55                                                   | (-3.05, 1.95)  |         | 2.62                                        | (-3.48, 8.73)   |         |
| Female (vs male)                               | 0.40                                                    | (-0.34, 1.14)  | 0.29    | 0.44                                        | (-1.59, 2.47)   | 0.67    |
| White ethnicity (vs non-white)                 | 3.60                                                    | (1.46, 5.75)   | 0.001   | 8.78                                        | (1.85, 15.70)   | 0.013   |
| Relationship (vs partner)                      |                                                         |                | <0.001  |                                             |                 | 0.28    |
| Parent                                         | 0.00                                                    | (-1.39, 1.39)  |         | 0.08                                        | (-5.73, 5.90)   |         |
| Child                                          | -0.94                                                   | (-1.83, -0.05) |         | -1.274                                      | (-3.69, 1.14)   |         |
| Sibling                                        | -2.16                                                   | (-3.50, -0.82) |         | 0.909                                       | (-3.02, 4.84)   |         |
| Other-relative                                 | -1.63                                                   | (-2.81, -0.44) |         | -0.619                                      | (-3.60, 2.36)   |         |
| Other-non relative                             | -3.42                                                   | (-5.22, -1.62) |         | -6.134                                      | (-11.69, -0.58) |         |
| Next of kin                                    | 1.74                                                    | (1.05, 2.44)   | <0.001  | 2.69                                        | (0.78, 4.59)    | 0.006   |
| Lives with patient                             | 1.95                                                    | (1.20, 2.69)   | <0.001  | 1.15                                        | (-0.99, 3.29)   | 0.29    |
| Education (vs NVQ 1 or 2)                      |                                                         |                | <0.001  |                                             |                 | 0.16    |
| NVQ 3                                          | -0.60                                                   | (-1.77, 0.57)  |         | 1.14                                        | (-2.09, 4.37)   |         |
| NVQ 4 or 5                                     | -2.43                                                   | (-3.49, -1.37) |         | -2.07                                       | (-4.92, 0.77)   |         |
| Other                                          | -0.18                                                   | (-1.35, 0.98)  |         | -1.75                                       | (-4.73, 1.24)   |         |
| Quintile of deprivation (vs 1, least deprived) |                                                         |                | 0.63    |                                             |                 | 0.77    |
| 2                                              | 0.49                                                    | (-0.74, 1.72)  |         | 0.64                                        | (-2.73, 4.01)   |         |
| 3                                              | 0.96                                                    | (-0.29, 2.20)  |         | 0.84                                        | (-2.59, 4.26)   |         |
| 4                                              | 0.32                                                    | (-0.97, 1.60)  |         | -1.07                                       | (-4.59, 2.44)   |         |
| 5 (most deprived)                              | 0.67                                                    | (-0.70, 2.05)  |         | 0.79                                        | (-3.10, 4.69)   |         |
| Distance from home to hospital (per 10 km)     | -0.05                                                   | (-0.11, 0.01)  | 0.12    | 0.05                                        | (-0.09, 0.18)   | 0.49    |
| Previous experience of ICU as a family member  | 0.25                                                    | (-0.63, 1.14)  | 0.58    | -0.68                                       | (-3.22, 1.87)   | 0.60    |
| Frequent visitor                               | 2.52                                                    | (1.63, 3.41)   | <0.001  | 2.91                                        | (0.36, 5.47)    | 0.030   |

Coef., coefficient.

<sup>a</sup> Two family members returned questionnaires but did not complete any of the 24 FS-ICU items – responses were not imputed for these family members.

**Table S4** Univariable analyses of factors associated with overall family satisfaction score by ICU outcome – patient characteristics

| Variables                                         | Family members of ICU survivors [N=6,147 <sup>a</sup> ] |                |         | Family members of ICU non-survivors [N=870] |                 |         |
|---------------------------------------------------|---------------------------------------------------------|----------------|---------|---------------------------------------------|-----------------|---------|
|                                                   | Coef.                                                   | 95% CI         | p-value | Coef.                                       | 95% CI          | p-value |
| Age (per 10 years)                                | -0.09                                                   | (-0.36, 0.17)  | 0.49    | 1.12                                        | (0.11, 2.14)    | 0.030   |
| Female (vs male)                                  | 0.67                                                    | (-0.25, 1.59)  | 0.16    | 2.04                                        | (-0.66, 4.74)   | 0.14    |
| White ethnicity (vs non-white)                    | 2.39                                                    | (0.11, 4.68)   | 0.040   | 9.25                                        | (2.38, 16.12)   | 0.008   |
| Quintile of deprivation (vs 1, least deprived)    |                                                         |                | 0.76    |                                             |                 | 0.95    |
| 2                                                 | 0.86                                                    | (-0.66, 2.38)  |         | -1.28                                       | (-5.85, 3.29)   |         |
| 3                                                 | 0.62                                                    | (-0.90, 2.13)  |         | -0.68                                       | (-5.12, 3.75)   |         |
| 4                                                 | 0.77                                                    | (-0.75, 2.28)  |         | -1.62                                       | (-6.03, 2.78)   |         |
| 5 (most deprived)                                 | 1.00                                                    | (-0.57, 2.57)  |         | -1.49                                       | (-6.04, 3.06)   |         |
| Distance from home to hospital (per 10 km)        | 0.12                                                    | (0.00, 0.24)   | 0.047   | 0.18                                        | (-0.05, 0.41)   | 0.12    |
| Severe comorbidities                              |                                                         |                |         |                                             |                 |         |
| Liver                                             | 3.18                                                    | (-0.01, 6.38)  | 0.050   | 1.25                                        | (-4.67, 7.19)   | 0.68    |
| Renal                                             | -0.45                                                   | (-3.57, 2.66)  | 0.77    | -8.87                                       | (-18.35, 0.60)  | 0.067   |
| Respiratory                                       | 0.01                                                    | (-2.84, 2.85)  | 1.00    | -1.02                                       | (-7.23, 5.19)   | 0.75    |
| Cardiovascular                                    | -0.14                                                   | (-3.23, 2.94)  | 0.93    | 1.40                                        | (-6.46, 9.26)   | 0.73    |
| Metastatic cancer                                 | -2.81                                                   | (-5.78, 0.15)  | 0.063   | 3.26                                        | (-6.38, 12.90)  | 0.51    |
| Haematological malignancy                         | 2.25                                                    | (-1.09, 5.61)  | 0.19    | -7.88                                       | (-14.62, -1.13) | 0.022   |
| Immunocompromise                                  | -0.91                                                   | (-2.74, 0.90)  | 0.33    | -3.90                                       | (-8.55, 0.74)   | 0.10    |
| Dependency (vs none)                              |                                                         |                | 0.30    |                                             |                 | 0.85    |
| Minor or major                                    | -0.14                                                   | (-1.36, 1.08)  |         | 0.63                                        | (-2.34, 3.60)   |         |
| Total                                             | -3.63                                                   | (-8.21, 0.94)  |         | 2.73                                        | (-10.21, 15.67) |         |
| Surgical status (vs non-surgical)                 |                                                         |                | 0.005   |                                             |                 | 0.78    |
| Planned elective/scheduled                        | -2.17                                                   | (-3.51, -0.83) |         | -2.83                                       | (-10.75, 5.10)  |         |
| Unplanned                                         | -0.17                                                   | (-1.29, 0.96)  |         | -0.06                                       | (-3.89, 3.76)   |         |
| ICNARC Physiology Score (per point)               | 0.19                                                    | (0.13, 0.25)   | <0.001  | 0.19                                        | (0.02, 0.35)    | 0.026   |
| ICU length of stay (per day)                      | 0.02                                                    | (-0.03, 0.06)  | 0.44    | -0.34                                       | (-0.48, -0.20)  | <0.001  |
| Advanced respiratory support                      | 3.62                                                    | (2.63, 4.61)   | <0.001  | 1.96                                        | (-1.84, 5.76)   | 0.31    |
| Advanced cardiovascular support                   | 2.06                                                    | (0.89, 3.22)   | 0.001   | 0.83                                        | (-2.06, 3.72)   | 0.58    |
| Renal support                                     | 1.52                                                    | (0.11, 2.93)   | 0.034   | 0.04                                        | (-2.83, 2.91)   | 0.98    |
| Neurological support                              | 1.96                                                    | (0.39, 3.54)   | 0.014   | 2.95                                        | (-0.42, 6.32)   | 0.086   |
| Duration of adv. respiratory support (per day)    | 0.11                                                    | (0.05, 0.16)   | <0.001  | -0.16                                       | (-0.32, 0.00)   | 0.051   |
| Duration of adv. cardiovascular support (per day) | 0.40                                                    | (0.15, 0.65)   | 0.002   | 0.11                                        | (-0.33, 0.56)   | 0.62    |
| Duration of renal support (per day)               | 0.16                                                    | (0.00, 0.32)   | 0.048   | -0.15                                       | (-0.43, 0.13)   | 0.28    |
| Duration of neurological support (per day)        | 0.10                                                    | (-0.09, 0.29)  | 0.31    | 0.05                                        | (-0.43, 0.53)   | 0.84    |
| Death before acute hospital discharge             | -0.49                                                   | (-1.52, 0.55)  | 0.36    | N/A                                         |                 |         |

Coef., coefficient.

1  
2  
3     <sup>a</sup> Two family members returned questionnaires but did not complete any of the 24 FS-ICU items –  
4     responses were not imputed for these family members.  
5  
6  
7  
8  
9  
10  
11  
12  
13  
14  
15  
16  
17  
18  
19  
20  
21  
22  
23  
24  
25  
26  
27  
28  
29  
30  
31  
32  
33  
34  
35  
36  
37  
38  
39  
40  
41  
42  
43  
44  
45  
46  
47  
48  
49  
50  
51  
52  
53  
54  
55  
56  
57  
58  
59  
60

For peer review only

**Table S5** Univariable analysis of factors associated with overall family satisfaction score by ICU outcome – ICU/hospital characteristics and contextual factors

| Variables                                              | Family members of ICU survivors [N=6,147 <sup>a</sup> ] |               |         | Family members of ICU non-survivors [N=870] |                |         |
|--------------------------------------------------------|---------------------------------------------------------|---------------|---------|---------------------------------------------|----------------|---------|
|                                                        | Coef.                                                   | 95% CI        | p-value | Coef.                                       | 95% CI         | p-value |
| Hospital type (vs non-university)                      |                                                         |               | 0.51    |                                             |                | 0.62    |
| University                                             | 0.06                                                    | (-3.63, 3.75) |         | -0.32                                       | (-4.72, 4.07)  |         |
| University affiliated                                  | 1.93                                                    | (-1.56, 5.42) |         | 1.68                                        | (-2.29, 5.65)  |         |
| Number of ICU beds (per bed)                           | -0.05                                                   | (-0.23, 0.14) | 0.63    | 0.02                                        | (-0.22, 0.26)  | 0.85    |
| Month of ICU admission (vs January)                    |                                                         |               | 0.95    |                                             |                | 0.85    |
| February                                               | -0.61                                                   | (-2.87, 1.65) |         | -0.03                                       | (-6.90, 6.83)  |         |
| March                                                  | 0.09                                                    | (-2.12, 2.30) |         | -0.06                                       | (-6.73, 6.60)  |         |
| April                                                  | 0.54                                                    | (-1.71, 2.79) |         | 0.07                                        | (-6.93, 7.07)  |         |
| May                                                    | -0.06                                                   | (-2.31, 2.18) |         | 0.73                                        | (-5.62, 7.08)  |         |
| June                                                   | -0.66                                                   | (-2.65, 1.34) |         | 0.84                                        | (-4.95, 6.64)  |         |
| July                                                   | 0.85                                                    | (-1.41, 3.11) |         | 3.91                                        | (-2.71, 10.52) |         |
| August                                                 | 0.65                                                    | (-1.64, 2.93) |         | -0.70                                       | (-6.87, 5.46)  |         |
| September                                              | 0.09                                                    | (-2.14, 2.31) |         | 1.74                                        | (-4.76, 8.25)  |         |
| October                                                | 0.44                                                    | (-1.76, 2.63) |         | 1.15                                        | (-5.69, 7.98)  |         |
| November                                               | 0.60                                                    | (-1.65, 2.85) |         | 2.21                                        | (-4.10, 8.53)  |         |
| December                                               | 0.69                                                    | (-1.57, 2.96) |         | 5.16                                        | (-1.13, 11.46) |         |
| Questionnaire received while patient still in hospital | 0.087                                                   | (-1.50, 1.67) | 0.91    | N/A                                         |                |         |

Coef., coefficient.

<sup>a</sup> Two family members returned questionnaires but did not complete any of the 24 FS-ICU items – responses were not imputed for these family members.



**Table S6** Sensitivity analyses –candidate determinants for the multivariable multilevel models for the family satisfaction in the intensive care unit

| Candidate determinants                                         | Justification inclusion/exclusion                                                                                                                                                                                | Approach to modelling                                                                                                  |
|----------------------------------------------------------------|------------------------------------------------------------------------------------------------------------------------------------------------------------------------------------------------------------------|------------------------------------------------------------------------------------------------------------------------|
| <b>Family member level</b>                                     |                                                                                                                                                                                                                  |                                                                                                                        |
| Education level                                                | It was not considered in the multivariable models due to higher than expected proportions of both “Not stated” (17%) and “Other” (21%) responses, suggesting a lack of comprehension of the categorisation used. |                                                                                                                        |
| Distance from home to hospital                                 | No significant after adjusting for other variables in the model. It was dropped.                                                                                                                                 |                                                                                                                        |
| Family member age, years                                       | Controlling effect                                                                                                                                                                                               | Categorical (<30;30-39;40-49;50-59;60-69;70-79;80+)                                                                    |
| Family member sex                                              | Controlling effect                                                                                                                                                                                               | Categorical (male; female)                                                                                             |
| Family member ethnicity                                        | Statistically significant in univariable                                                                                                                                                                         | Categorical (white; non-white)                                                                                         |
| Next-of-kin/lives with patient                                 | There was a strong multicollinearity between relationship to the patient and the other key variables of next-of-kin and lives with patient.                                                                      | Categorical (lives with patient; Next-of-kin, does not live with patient; Not next-of-kin, does not live with patient) |
| Frequent visitor                                               | Statistically significant in univariable                                                                                                                                                                         | Binary (yes; no)                                                                                                       |
| <b>Patient level</b>                                           |                                                                                                                                                                                                                  |                                                                                                                        |
| Patient ethnicity                                              | It was not carried forward to the multivariable models due to collinearity with family member ethnicity.                                                                                                         |                                                                                                                        |
| Patient age                                                    | Controlling effect                                                                                                                                                                                               | Continuous(linear)                                                                                                     |
| Patient sex                                                    | Controlling effect                                                                                                                                                                                               | Categorical (male; female)                                                                                             |
| Dependency                                                     | Controlling effect                                                                                                                                                                                               | Categorical (none; minor or major; total)                                                                              |
| Surgical status (vs non-surgical)                              | Controlling effect                                                                                                                                                                                               | Categorical (non-surgical; planned elective/scheduled; unplanned)                                                      |
| ICNARC Physiology Score                                        | Statistically significant in univariable                                                                                                                                                                         | Continuous(linear)                                                                                                     |
| ICU length of stay (days)                                      |                                                                                                                                                                                                                  | Continuous(linear)                                                                                                     |
| Organ support received in the ICU and duration (calendar days) | Once included in the multivariable model for                                                                                                                                                                     |                                                                                                                        |

|                                                    |                                                                                                                                                      |                                                                 |
|----------------------------------------------------|------------------------------------------------------------------------------------------------------------------------------------------------------|-----------------------------------------------------------------|
| of organ support among those receiving the support | survivors, only advanced respiratory support remained significant.                                                                                   |                                                                 |
| Advanced respiratory support                       | It was found to be preferable to alternative variable of the duration of advanced respiratory support, which was correlated with ICU length of stay. | Binary (yes; no)                                                |
| haematological malignancy                          | No significant after adjusting for other variables in the model. It was dropped.                                                                     |                                                                 |
| <b>ICU/hospital level</b>                          |                                                                                                                                                      |                                                                 |
| Hospital type                                      | Controlling effect                                                                                                                                   | Categorical (non-university; university; university affiliated) |
| Number of ICU beds                                 | Controlling effect                                                                                                                                   | Continuous(linear)                                              |

**Table S7** Multivariable multilevel models for the satisfaction with care domain score

| Variables                                              | Family members of ICU survivors [N=6,143 <sup>a</sup> ] |                 |         | Family members of ICU non-survivors [N=869 <sup>a</sup> ] |                |         |
|--------------------------------------------------------|---------------------------------------------------------|-----------------|---------|-----------------------------------------------------------|----------------|---------|
|                                                        | Coef.                                                   | 95% CI          | p-value | Coef.                                                     | 95% CI         | p-value |
| Fixed effects – family member level                    |                                                         |                 |         |                                                           |                |         |
| Constant                                               | 71.45                                                   | (66.67, 76.22)  |         | 55.29                                                     | (41.76, 68.82) |         |
| Family member age, years (vs <30)                      |                                                         |                 | 0.001   |                                                           |                | 0.16    |
| 30-39                                                  | 2.60                                                    | (0.81, 4.38)    |         | 2.50                                                      | (-1.97, 6.97)  |         |
| 40-49                                                  | 2.73                                                    | (1.16, 4.31)    |         | 4.31                                                      | (0.09, 8.54)   |         |
| 50-59                                                  | 2.91                                                    | (1.36, 4.44)    |         | 4.99                                                      | (0.93, 9.04)   |         |
| 60-69                                                  | 2.67                                                    | (1.08, 4.26)    |         | 4.89                                                      | (0.54, 9.23)   |         |
| 70-79                                                  | 2.66                                                    | (0.90, 4.41)    |         | 5.91                                                      | (0.88, 10.94)  |         |
| 80+                                                    | -0.17                                                   | (-2.76, 2.41)   |         | 1.85                                                      | (-4.51, 8.21)  |         |
| Family member sex – female (vs male)                   | 0.42                                                    | (-0.35, 1.20)   | 0.29    | 0.22                                                      | (-1.81, 2.25)  | 0.83    |
| Family member ethnicity – white (vs non-white)         | 3.87                                                    | (1.77, 5.97)    | <0.001  | 6.99                                                      | (0.19, 13.81)  | 0.044   |
| Next-of-kin/lives with patient (vs lives with patient) |                                                         |                 | <0.001  |                                                           |                | 0.15    |
| Next-of-kin, does not live with patient                | -1.14                                                   | (-2.26, -0.02)  |         | 0.95                                                      | (-2.39, 4.29)  |         |
| Not next-of-kin, does not live with patient            | -2.44                                                   | (-3.32, -1.55)  |         | -1.58                                                     | (-4.11, 0.94)  |         |
| Frequent visitor                                       | 2.49                                                    | (1.52, 3.46)    | <0.001  | 1.49                                                      | (-1.27, 4.25)  | 0.29    |
| Fixed effects – patient level                          |                                                         |                 |         |                                                           |                |         |
| Patient age (per 10 years)                             | 0.03                                                    | (-0.25, 0.31)   | 0.83    | 1.21                                                      | (0.16, 2.26)   | 0.024   |
| Patient sex – female (vs male)                         | 0.06                                                    | (-0.85, 0.98)   | 0.87    | 1.85                                                      | (-0.79, 4.5)   | 0.17    |
| Dependency (vs none)                                   |                                                         |                 | 0.006   |                                                           |                | 0.68    |
| Minor or major                                         | -0.74                                                   | (-1.96, 0.46)   |         | -0.94                                                     | (-3.98, 2.09)  |         |
| Total                                                  | -6.77                                                   | (-11.18, -2.36) |         | 3.62                                                      | (-8.71, 15.95) |         |
| Surgical status (vs non-surgical)                      |                                                         |                 | 0.68    |                                                           |                | 0.47    |
| Planned elective/scheduled                             | -0.62                                                   | (-2.04, 0.78)   |         | -4.85                                                     | (-12.71, 2.99) |         |
| Unplanned                                              | -0.15                                                   | (-1.27, 0.95)   |         | -0.57                                                     | (-4.29, 3.13)  |         |
| ICNARC Physiology Score (per point)                    | 0.14                                                    | (0.07, 0.21)    | <0.001  | 0.14                                                      | (-0.03, 0.30)  | 0.10    |
| ICU length of stay (per day)                           | -0.02                                                   | (-0.06, 0.02)   | 0.39    | -0.30                                                     | (-0.45, -0.15) | <0.001  |
| Advanced respiratory support                           | 2.74                                                    | (1.66, 3.82)    | <0.001  |                                                           |                |         |
| Fixed effects – ICU/hospital level                     |                                                         |                 |         |                                                           |                |         |
| Hospital type (vs non-university)                      |                                                         |                 | 0.51    |                                                           |                | 0.58    |

|                                        |                     |                    |                    |      |
|----------------------------------------|---------------------|--------------------|--------------------|------|
| University                             | 0.94 (-3.58, 5.47)  | -1.48 (-7.8, 4.84) |                    |      |
| University affiliated                  | 1.92 (-1.34, 5.19)  | 1.79 (-2.75, 6.34) |                    |      |
| Number of ICU beds (per bed)           | -0.01 (-0.24, 0.23) | 0.96               | 0.24 (-0.12, 0.59) | 0.19 |
| Random effects – SD (SE)               |                     |                    |                    |      |
| Between ICUs                           | 2.98 (0.60)         | 3.25 (1.11)        |                    |      |
| Within ICUs between patients           | 9.76 (0.28)         | 10.47 (0.66)       |                    |      |
| Within patients between family members | 11.96 (0.19)        | 11.92 (0.42)       |                    |      |

Coef, coefficient; SE, standard error.

<sup>a</sup> Five patients were missing age group on both the questionnaire and web portal – due to the very small amount of missing data in this key variable, these missing values were not imputed.

**Table S8** Multivariable multilevel models for the satisfaction with information domain score

| Variables                                              | Family members of ICU survivors [N=6,143 <sup>a</sup> ] |                |         | Family members of ICU non-survivors [N=869 <sup>a</sup> ] |                |         |
|--------------------------------------------------------|---------------------------------------------------------|----------------|---------|-----------------------------------------------------------|----------------|---------|
|                                                        | Coef.                                                   | 95% CI         | p-value | Coef.                                                     | 95% CI         | p-value |
| Fixed effects – family member level                    |                                                         |                |         |                                                           |                |         |
| Constant                                               | 66.07                                                   | (59.78, 72.21) |         | 55.86                                                     | (39.34, 72.38) |         |
| Family member age, years (vs <30)                      |                                                         |                | 0.63    |                                                           |                | 0.28    |
| 30-39                                                  | 0.28                                                    | (-2.22, 2.79)  |         | 1.23                                                      | (-4.92, 7.39)  |         |
| 40-49                                                  | 0.00                                                    | (-2.21, 2.21)  |         | 1.88                                                      | (-3.92, 7.68)  |         |
| 50-59                                                  | 0.55                                                    | (-1.62, 2.72)  |         | 2.88                                                      | (-2.70, 8.48)  |         |
| 60-69                                                  | -0.1                                                    | (-2.35, 2.14)  |         | 4.24                                                      | (-1.71, 10.2)  |         |
| 70-79                                                  | -0.41                                                   | (-2.89, 2.08)  |         | 6.43                                                      | (-0.45, 13.31) |         |
| 80+                                                    | -2.67                                                   | (-6.35, 1.01)  |         | -1.96                                                     | (-10.71, 6.79) |         |
| Family member sex – female (vs male)                   | 0.20                                                    | (-0.89, 1.30)  | 0.72    | 1.01                                                      | (-1.81, 3.82)  | 0.49    |
| Family member ethnicity – white (vs non-white)         | 4.73                                                    | (1.78, 7.68)   | 0.002   | 9.34                                                      | (0.47, 18.21)  | 0.039   |
| Next-of-kin/lives with patient (vs lives with patient) |                                                         |                | <0.001  |                                                           |                | 0.38    |
| Next-of-kin, does not live with patient                | -2.39                                                   | (-3.97, 0.81)  |         | 1.43                                                      | (-3.09, 5.95)  |         |
| Not next-of-kin, does not live with patient            | -2.57                                                   | (-3.83, 1.31)  |         | -1.21                                                     | (-4.69, 2.28)  |         |
| Frequent visitor                                       | 2.11                                                    | (0.74, 3.48)   | 0.002   | 0.44                                                      | (-3.33, 4.22)  | 0.82    |
| Fixed effects – patient level                          |                                                         |                |         |                                                           |                |         |
| Patient age (per 10 years)                             | -0.22                                                   | (-0.61, 0.18)  | 0.28    | 0.92                                                      | (-0.43, 2.27)  | 0.18    |
| Patient sex – female (vs male)                         | 0.32                                                    | (-0.98, 1.62)  | 0.63    | 1.93                                                      | (-1.48, 5.35)  | 0.27    |
| Dependency (vs none)                                   |                                                         |                | 0.61    |                                                           |                | 0.51    |
| Minor or major                                         | -0.49                                                   | (-2.2, 1.2)    |         | -0.28                                                     | (-4.11, 3.53)  |         |
| Total                                                  | -2.69                                                   | (-8.92, 3.52)  |         | 9.15                                                      | (-6.57, 24.87) |         |
| Surgical status (vs non-surgical)                      |                                                         |                | 0.88    |                                                           |                | 0.84    |
| Planned elective/scheduled                             | -0.32                                                   | (-2.32, 1.66)  |         | -0.88                                                     | (-10.97, 9.21) |         |
| Unplanned                                              | 0.23                                                    | (-1.33, 1.80)  |         | -1.4                                                      | (-6.16, 3.36)  |         |
| ICNARC Physiology Score (per point)                    | 0.23                                                    | (0.13, 0.33)   | <0.001  | 0.15                                                      | (-0.04, 0.36)  | 0.13    |
| ICU length of stay (per day)                           | -0.05                                                   | (-0.11, 0.01)  | 0.14    | -0.43                                                     | (-0.62, -0.24) | <0.001  |
| Advanced respiratory support                           | 3.34                                                    | (1.83, 4.85)   | <0.001  | --                                                        |                |         |
| Fixed effects – ICU/hospital level                     |                                                         |                |         |                                                           |                |         |
| Hospital type (vs non-university)                      |                                                         |                | 0.45    |                                                           |                | 0.58    |

|                                        |       |               |       |                         |
|----------------------------------------|-------|---------------|-------|-------------------------|
| University                             | 1.69  | (-3.71, 7.08) | 0.35  | (-6.42, 7.13)           |
| University affiliated                  | 2.48  | (-1.42, 6.40) | 2.53  | (-2.32, 7.39)           |
| Number of ICU beds (per bed)           | -0.03 | (-0.31, 0.24) | 0.81  | 0.21 (-0.17, 0.61) 0.27 |
| Random effects – SD (SE)               |       |               |       |                         |
| Between ICUs                           | 3.48  | (0.73)        | 2.81  | (1.37)                  |
| Within ICUs between patients           | 13.64 | (0.41)        | 12.38 | (0.97)                  |
| Within patients between family members | 16.88 | (0.27)        | 17.02 | (0.60)                  |

Coef, coefficient; SE, standard error.

<sup>a</sup> Five patients were missing age group on both the questionnaire and web portal – due to the very small amount of missing data in this key variable, these missing values were not imputed.

**Table S9** Multivariable multilevel models for the satisfaction with the decision-making process domain score

| Variables                                              | Family members of ICU survivors [N=6,143 <sup>a</sup> ] |                | Family members of ICU non-survivors [N=869 <sup>a</sup> ] |       |                 |         |
|--------------------------------------------------------|---------------------------------------------------------|----------------|-----------------------------------------------------------|-------|-----------------|---------|
|                                                        | Coef.                                                   | 95% CI         | p-value                                                   | Coef. | 95% CI          | p-value |
| Fixed effects – family member level                    |                                                         |                |                                                           |       |                 |         |
| Constant                                               | 61.65                                                   | (55.17, 68.14) |                                                           | 39.62 | (20.14, 59.09)  |         |
| Family member age, years (vs <30)                      |                                                         |                | 0.061                                                     |       |                 | 0.40    |
| 30-39                                                  | 1.66                                                    | (-1.63, 4.95)  |                                                           | 1.37  | (-5.35, 8.10)   |         |
| 40-49                                                  | 0.02                                                    | (-2.76, 2.82)  |                                                           | 2.73  | (-3.47, 8.95)   |         |
| 50-59                                                  | 0.52                                                    | (-2.21, 3.25)  |                                                           | 3.34  | (-2.61, 9.31)   |         |
| 60-69                                                  | -1.43                                                   | (-4.48, 1.61)  |                                                           | 3.35  | (-3.05, 9.77)   |         |
| 70-79                                                  | -1.09                                                   | (-4.32, 2.13)  |                                                           | 6.25  | (-1.36, 13.88)  |         |
| 80+                                                    | -3.87                                                   | (-8.43, 0.69)  |                                                           | -3.13 | (-12.88, 6.61)  |         |
| Family member sex – female (vs male)                   | -0.18                                                   | (-1.42, 1.04)  | 0.77                                                      | 1.66  | (-1.37, 4.71)   | 0.28    |
| Family member ethnicity – white (vs non-white)         | 0.81                                                    | (-2.67, 4.30)  | 0.65                                                      | 6.46  | (-4.24, 17.15)  | 0.24    |
| Next-of-kin/lives with patient (vs lives with patient) |                                                         |                | 0.10                                                      |       |                 | 0.86    |
| Next-of-kin, does not live with patient                | -0.93                                                   | (-2.93, 1.05)  |                                                           | 1.39  | (-3.49, 6.28)   |         |
| Not next-of-kin, does not live with patient            | -1.65                                                   | (-3.22, 0.07)  |                                                           | 0.48  | (-3.49, 4.46)   |         |
| Frequent visitor                                       | 5.31                                                    | (3.38, 7.23)   | <0.001                                                    | 3.84  | (-0.21, 7.91)   | 0.063   |
| Fixed effects – patient level                          |                                                         |                |                                                           |       |                 |         |
| Patient age (per 10 years)                             | 0.26                                                    | (-0.20, 0.73)  | 0.27                                                      | 2.19  | (0.61, 3.78)    | 0.007   |
| Patient sex – female (vs male)                         | 0.79                                                    | (-0.84, 2.43)  | 0.34                                                      | 1.29  | (-2.67, 5.26)   | 0.52    |
| Dependency (vs none)                                   |                                                         |                | 0.44                                                      |       |                 | 0.47    |
| Minor or major                                         | 1.34                                                    | (-0.74, 3.43)  |                                                           | 2.91  | (-1.48, 7.29)   |         |
| Total                                                  | 0.11                                                    | (-7.42, 7.64)  |                                                           | 4.27  | (-17.36, 25.91) |         |
| Surgical status (vs non-surgical)                      |                                                         |                | 0.25                                                      |       |                 | 0.68    |
| Planned elective/scheduled                             | -1.83                                                   | (-4.35, 0.68)  |                                                           | -1.09 | (-12.59, 10.41) |         |
| Unplanned                                              | -1.35                                                   | (-3.41, 0.71)  |                                                           | 2.35  | (-3.20, 7.91)   |         |
| ICNARC Physiology Score (per point)                    | 0.12                                                    | (0.01, 0.24)   | 0.040                                                     | 0.19  | (-0.04, 0.44)   | 0.12    |
| ICU length of stay (per day)                           | 0.03                                                    | (-0.04, 0.11)  | 0.39                                                      | -0.17 | (-0.39, 0.03)   | 0.11    |
| Advanced respiratory support                           | 3.03                                                    | (1.08, 4.97)   | 0.002                                                     | --    |                 |         |
| Fixed effects – ICU/hospital level                     |                                                         |                |                                                           |       |                 |         |

|                                        |                     |      |                      |       |
|----------------------------------------|---------------------|------|----------------------|-------|
| Hospital type (vs non-university)      |                     | 0.50 |                      | 0.55  |
| University                             | -0.41 (-4.27, 3.46) |      | -4.44 (-12.41, 3.53) |       |
| University affiliated                  | 1.51 (-1.37, 4.39)  |      | -0.86 (-6.56, 4.83)  |       |
| Number of ICU beds (per bed)           | 0.02 (-0.19, 0.23)  | 0.85 | 0.47 (0.02, 0.93)    | 0.042 |
| Random effects – SD (SE)               |                     |      |                      |       |
| Between ICUs                           | 2.06 (0.66)         |      | 3.33 (1.50)          |       |
| Within ICUs between patients           | 17.24 (0.50)        |      | 15.84 (1.06)         |       |
| Within patients between family members | 17.02 (0.40)        |      | 16.81 (0.66)         |       |

Coef, coefficient; SE, standard error.

<sup>a</sup> Five patients were missing age group on both the questionnaire and web portal – due to the very small amount of missing data in this key variable, these missing values were not imputed.



**Figure S2** Variation across ICUs in the mean: satisfaction with care domain score (A) before and (B) after adjustment; satisfaction with information domain score (C) before and (D) after adjustment; and satisfaction with the decision-making process domain score (E) before and (F) after adjustment

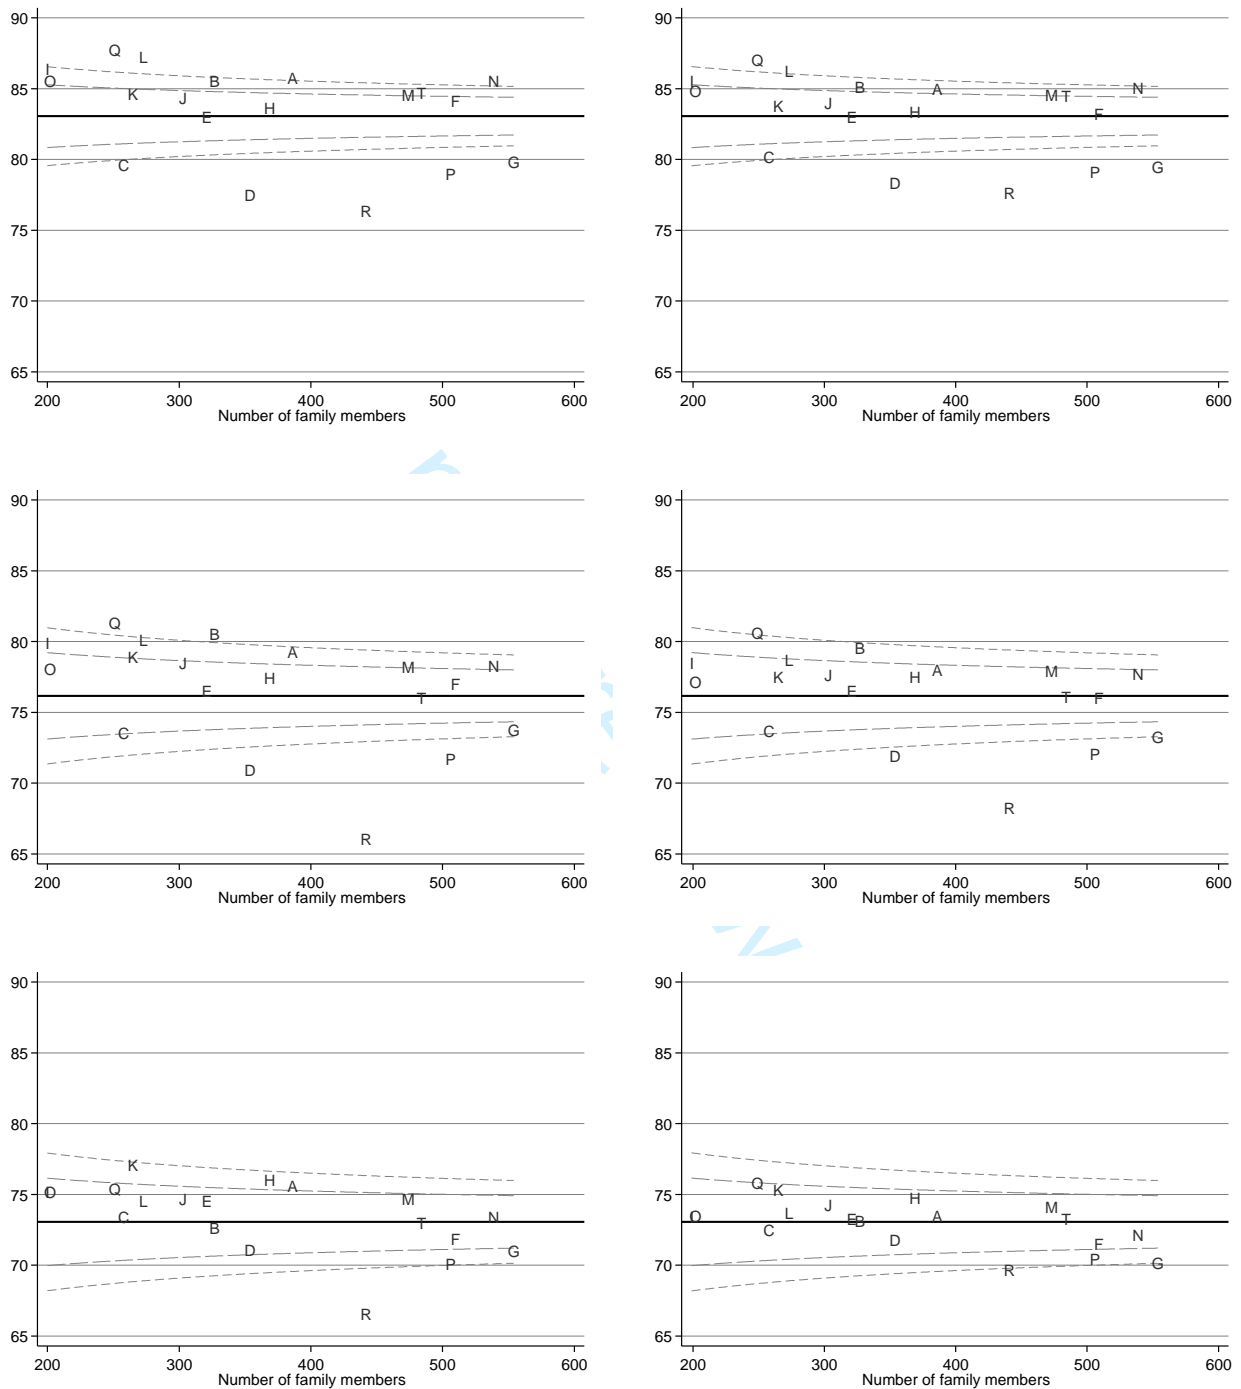

**Table S10** Sensitivity analyses – alternative approach to handling missing data (family members of ICU survivors)

| Variables                                              | Complete case<br>[N=2,351] |      |         | Traditional approach<br>[N=5,756] |      |         |
|--------------------------------------------------------|----------------------------|------|---------|-----------------------------------|------|---------|
|                                                        | Coef.                      | SE   | p-value | Coef.                             | SE   | p-value |
| Constant                                               | 72.60                      | 3.18 |         | 70.35                             | 2.49 |         |
| Family member age, years (vs <30)                      |                            |      | 0.61    |                                   |      | 0.20    |
| 30-39                                                  | 0.13                       | 1.40 |         | 1.47                              | 0.97 |         |
| 40-49                                                  | 0.85                       | 1.22 |         | 1.41                              | 0.86 |         |
| 50-59                                                  | 0.66                       | 1.20 |         | 1.58                              | 0.84 |         |
| 60-69                                                  | 0.65                       | 1.30 |         | 1.47                              | 0.88 |         |
| 70-79                                                  | 0.77                       | 1.47 |         | 1.69                              | 0.98 |         |
| 80+                                                    | -3.06                      | 2.26 |         | -1.22                             | 1.50 |         |
| Family member sex – female (vs male)                   | 0.94                       | 0.60 | 0.12    | 0.21                              | 0.43 | 0.63    |
| Family member ethnicity – white (vs non-white)         | 7.58                       | 1.58 | <0.001  | 3.99                              | 1.16 | 0.001   |
| Next-of-kin/lives with patient (vs lives with patient) |                            |      | 0.071   |                                   |      | 0.002   |
| Next-of-kin, does not live with patient                | -1.69                      | 0.85 |         | -1.36                             | 0.61 |         |
| Not next-of-kin, does not live with patient            | -1.42                      | 0.72 |         | -1.70                             | 0.50 |         |
| Frequent visitor                                       | 1.18                       | 0.82 | 0.15    | 2.21                              | 0.55 | <0.001  |
| Patient age (per 10 years)                             | -0.09                      | 0.22 | 0.67    | -0.07                             | 0.15 | 0.64    |
| Patient sex – female (vs male)                         | -1.20                      | 0.73 | 0.10    | 0.13                              | 0.52 | 0.79    |
| Dependency (vs none)                                   |                            |      | 0.70    |                                   |      | 0.45    |
| Minor or major                                         | -0.44                      | 0.92 |         | -0.19                             | 0.68 |         |
| Total                                                  | -2.19                      | 2.98 |         | -3.14                             | 2.51 |         |
| Surgical status (vs non-surgical)                      |                            |      | 0.056   |                                   |      | 0.47    |
| Planned elective/scheduled                             | -3.11                      | 1.30 |         | -0.93                             | 0.80 |         |
| Unplanned                                              | -0.44                      | 0.88 |         | 0.02                              | 0.62 |         |
| ICNARC Physiology Score (per point)                    | 0.08                       | 0.05 | 0.14    | 0.15                              | 0.04 | <0.001  |
| ICU length of stay (per day)                           | -0.04                      | 0.03 | 0.28    | -0.04                             | 0.03 | 0.17    |
| Advanced respiratory support                           | 1.39                       | 0.87 | 0.11    | 2.40                              | 0.60 | <0.001  |
| Hospital type (vs non-university)                      |                            |      | 0.42    |                                   |      | 0.34    |
| University                                             | 0.56                       | 2.36 |         | 1.45                              | 2.22 |         |

1  
2  
3  
4  
5  
6  
7  
8  
9  
10  
11  
12  
13  
14  
15  
16  
17  
18  
19  
20  
21  
22  
23  
24  
25  
26  
27  
28  
29  
30  
31  
32  
33  
34  
35  
36  
37  
38  
39  
40  
41  
42  
43  
44  
45  
46  
47  
48  
49  
50  
51  
52  
53  
54  
55  
56  
57  
58  
59  
60

|                              |      |      |      |       |      |      |
|------------------------------|------|------|------|-------|------|------|
| University affiliated        | 2.24 | 1.72 |      | 2.34  | 1.61 |      |
| Number of ICU beds (per bed) | 0.07 | 0.12 | 0.59 | -0.02 | 0.11 | 0.83 |

---

Coef., coefficient; SE, standard error.

For peer review only

**Table S11** Sensitivity analyses – alternative approaches to handling missing data (family members of ICU non-survivors)

| Variables                                              | Complete case<br>[N=547] |      |         | Traditional approach<br>[N=851] |      |         |
|--------------------------------------------------------|--------------------------|------|---------|---------------------------------|------|---------|
|                                                        | Coef.                    | SE   | p-value | Coef.                           | SE   | p-value |
| Constant                                               | 54.46                    | 7.72 |         | 56.28                           | 6.80 |         |
| Family member age, years (vs <30)                      |                          |      | 0.17    |                                 |      | 0.086   |
| 30-39                                                  | 4.38                     | 3.01 |         | 3.14                            | 2.44 |         |
| 40-49                                                  | 7.51                     | 2.75 |         | 4.87                            | 2.31 |         |
| 50-59                                                  | 6.19                     | 2.62 |         | 4.50                            | 2.22 |         |
| 60-69                                                  | 7.41                     | 2.85 |         | 5.94                            | 2.37 |         |
| 70-79                                                  | 6.99                     | 3.69 |         | 7.07                            | 2.82 |         |
| 80+                                                    | 7.52                     | 4.41 |         | 0.32                            | 3.61 |         |
| Family member sex – female (vs male)                   | -0.02                    | 1.43 | 0.99    | 0.40                            | 1.11 | 0.72    |
| Family member ethnicity – white (vs non-white)         | 9.64                     | 4.21 | 0.022   | 7.47                            | 3.58 | 0.037   |
| Next-of-kin/lives with patient (vs lives with patient) |                          |      | 0.97    |                                 |      | 0.38    |
| Next-of-kin, does not live with patient                | 0.13                     | 2.20 |         | 1.27                            | 1.82 |         |
| Not next-of-kin, does not live with patient            | -0.32                    | 1.81 |         | -0.82                           | 1.40 |         |
| Frequent visitor                                       | 1.32                     | 1.96 | 0.50    | 0.99                            | 1.51 | 0.51    |
| Patient age (per 10 years)                             | 0.69                     | 0.66 | 0.29    | 1.09                            | 0.55 | 0.048   |
| Patient sex – female (vs male)                         | 1.56                     | 1.69 | 0.36    | 2.02                            | 1.41 | 0.15    |
| Dependency (vs none)                                   |                          |      | 0.47    |                                 |      | 0.66    |
| Minor or major                                         | -0.61                    | 1.86 |         | -0.32                           | 1.58 |         |
| Total                                                  | 8.53                     | 7.42 |         | 5.59                            | 6.45 |         |
| Surgical status (vs non-surgical)                      |                          |      | 0.84    |                                 |      | 0.51    |
| Planned elective/scheduled                             | -0.33                    | 5.61 |         | -4.86                           | 4.22 |         |
| Unplanned                                              | -1.38                    | 2.33 |         | -0.44                           | 1.95 |         |
| ICNARC Physiology Score (per point)                    | 0.24                     | 0.10 | 0.022   | 0.18                            | 0.09 | 0.041   |
| ICU length of stay (per day)                           | -0.27                    | 0.09 | 0.003   | -0.33                           | 0.08 | <0.001  |
| Hospital type (vs non-university)                      |                          |      | 0.83    |                                 |      | 0.77    |
| University                                             | -1.15                    | 3.20 |         | -0.11                           | 3.01 |         |
| University affiliated                                  | 0.84                     | 2.29 |         | 1.49                            | 2.17 |         |

1  
2  
3 Number of ICU beds (per bed) 0.25 0.19 0.17 0.21 0.17 0.23  
4

---

5 Coef., coefficient; SE, standard error.  
6  
7  
8  
9  
10  
11  
12  
13  
14  
15  
16  
17  
18  
19  
20  
21  
22  
23  
24  
25  
26  
27  
28  
29  
30  
31  
32  
33  
34  
35  
36  
37  
38  
39  
40  
41  
42  
43  
44  
45  
46  
47  
48  
49  
50  
51  
52  
53  
54  
55  
56  
57  
58  
59  
60

For peer review only

1  
2  
3  
4  
5  
6  
7  
8  
9  
10  
11  
12  
13  
14  
15  
16  
17  
18  
19  
20  
21  
22  
23  
24  
25  
26  
27  
28  
29  
30  
31  
32  
33  
34  
35  
36  
37  
38  
39  
40  
41  
42  
43  
44  
45  
46  
47  
48  
49  
50  
51  
52  
53  
54  
55  
56  
57  
58  
59  
60

## STROBE Statement—checklist of items that should be included in reports of observational studies

|                              | Item No | Recommendation                                                                                                                                                                                                                                                                                                                                                                                                                                                         | Page No |
|------------------------------|---------|------------------------------------------------------------------------------------------------------------------------------------------------------------------------------------------------------------------------------------------------------------------------------------------------------------------------------------------------------------------------------------------------------------------------------------------------------------------------|---------|
| <b>Title and abstract</b>    | 1       | (a) Indicate the study's design with a commonly used term in the title or the abstract                                                                                                                                                                                                                                                                                                                                                                                 | 1       |
|                              |         | (b) Provide in the abstract an informative and balanced summary of what was done and what was found                                                                                                                                                                                                                                                                                                                                                                    | 2       |
| <b>Introduction</b>          |         |                                                                                                                                                                                                                                                                                                                                                                                                                                                                        |         |
| Background/rationale         | 2       | Explain the scientific background and rationale for the investigation being reported                                                                                                                                                                                                                                                                                                                                                                                   | 4       |
| Objectives                   | 3       | State specific objectives, including any prespecified hypotheses                                                                                                                                                                                                                                                                                                                                                                                                       | 4       |
| <b>Methods</b>               |         |                                                                                                                                                                                                                                                                                                                                                                                                                                                                        |         |
| Study design                 | 4       | Present key elements of study design early in the paper                                                                                                                                                                                                                                                                                                                                                                                                                | 4       |
| Setting                      | 5       | Describe the setting, locations, and relevant dates, including periods of recruitment, exposure, follow-up, and data collection                                                                                                                                                                                                                                                                                                                                        | 4       |
| Participants                 | 6       | (a) <i>Cohort study</i> —Give the eligibility criteria, and the sources and methods of selection of participants. Describe methods of follow-up<br><i>Case-control study</i> —Give the eligibility criteria, and the sources and methods of case ascertainment and control selection. Give the rationale for the choice of cases and controls<br><i>Cross-sectional study</i> —Give the eligibility criteria, and the sources and methods of selection of participants | 4-5     |
|                              |         | (b) <i>Cohort study</i> —For matched studies, give matching criteria and number of exposed and unexposed<br><i>Case-control study</i> —For matched studies, give matching criteria and the number of controls per case                                                                                                                                                                                                                                                 | N/A     |
| Variables                    | 7       | Clearly define all outcomes, exposures, predictors, potential confounders, and effect modifiers. Give diagnostic criteria, if applicable                                                                                                                                                                                                                                                                                                                               | 4-6     |
| Data sources/<br>measurement | 8*      | For each variable of interest, give sources of data and details of methods of assessment (measurement). Describe comparability of assessment methods if there is more than one group                                                                                                                                                                                                                                                                                   |         |
| Bias                         | 9       | Describe any efforts to address potential sources of bias                                                                                                                                                                                                                                                                                                                                                                                                              | 4       |
| Study size                   | 10      | Explain how the study size was arrived at                                                                                                                                                                                                                                                                                                                                                                                                                              | N/A     |
| Quantitative variables       | 11      | Explain how quantitative variables were handled in the analyses. If applicable, describe which groupings were chosen and why                                                                                                                                                                                                                                                                                                                                           | 5-6     |
| Statistical methods          | 12      | (a) Describe all statistical methods, including those used to control for confounding                                                                                                                                                                                                                                                                                                                                                                                  | 5-6     |
|                              |         | (b) Describe any methods used to examine subgroups and interactions                                                                                                                                                                                                                                                                                                                                                                                                    | N/A     |
|                              |         | (c) Explain how missing data were addressed                                                                                                                                                                                                                                                                                                                                                                                                                            | 5-6     |
|                              |         | (d) <i>Cohort study</i> —If applicable, explain how loss to follow-up was addressed<br><i>Case-control study</i> —If applicable, explain how matching of cases and controls was addressed<br><i>Cross-sectional study</i> —If applicable, describe analytical methods taking account of sampling strategy                                                                                                                                                              |         |
|                              |         | (e) Describe any sensitivity analyses                                                                                                                                                                                                                                                                                                                                                                                                                                  | 6       |

Continued on next page

| <b>Results</b>           |     |                                                                                                                                                                                                                                                                                                 |                                               |
|--------------------------|-----|-------------------------------------------------------------------------------------------------------------------------------------------------------------------------------------------------------------------------------------------------------------------------------------------------|-----------------------------------------------|
| Participants             | 13* | (a) Report numbers of individuals at each stage of study—eg numbers potentially eligible, examined for eligibility, confirmed eligible, included in the study, completing follow-up, and analysed<br>(b) Give reasons for non-participation at each stage<br>(c) Consider use of a flow diagram | 6<br><br>Supplementary materials<br>Figure S1 |
| Descriptive data         | 14* | (a) Give characteristics of study participants (eg demographic, clinical, social) and information on exposures and potential confounders                                                                                                                                                        | Page 6-7 & Tables 1 & 2                       |
|                          |     | (b) Indicate number of participants with missing data for each variable of interest                                                                                                                                                                                                             | Supplementary materials<br>Tables S10 & S11   |
|                          |     | (c) <i>Cohort study</i> —Summarise follow-up time (eg, average and total amount)                                                                                                                                                                                                                | N/A                                           |
| Outcome data             | 15* | <i>Cohort study</i> —Report numbers of outcome events or summary measures over time                                                                                                                                                                                                             | 7 & Table 3                                   |
|                          |     | <i>Case-control study</i> —Report numbers in each exposure category, or summary measures of exposure                                                                                                                                                                                            |                                               |
|                          |     | <i>Cross-sectional study</i> —Report numbers of outcome events or summary measures                                                                                                                                                                                                              |                                               |
| Main results             | 16  | (a) Give unadjusted estimates and, if applicable, confounder-adjusted estimates and their precision (eg, 95% confidence interval). Make clear which confounders were adjusted for and why they were included                                                                                    | 7 & 8, Table 4 & Supplement<br>Tables S7-9 &  |
|                          |     | (b) Report category boundaries when continuous variables were categorized                                                                                                                                                                                                                       |                                               |
|                          |     | (c) If relevant, consider translating estimates of relative risk into absolute risk for a meaningful time period                                                                                                                                                                                |                                               |
| Other analyses           | 17  | Report other analyses done—eg analyses of subgroups and interactions, and sensitivity analyses                                                                                                                                                                                                  | 10-13 & supplement                            |
| <b>Discussion</b>        |     |                                                                                                                                                                                                                                                                                                 |                                               |
| Key results              | 18  | Summarise key results with reference to study objectives                                                                                                                                                                                                                                        | 13-14                                         |
| Limitations              | 19  | Discuss limitations of the study, taking into account sources of potential bias or imprecision. Discuss both direction and magnitude of any potential bias                                                                                                                                      | 13-14                                         |
| Interpretation           | 20  | Give a cautious overall interpretation of results considering objectives, limitations, multiplicity of analyses, results from similar studies, and other relevant evidence                                                                                                                      | 13-14                                         |
| Generalisability         | 21  | Discuss the generalisability (external validity) of the study results                                                                                                                                                                                                                           | 13-14                                         |
| <b>Other information</b> |     |                                                                                                                                                                                                                                                                                                 |                                               |
| Funding                  | 22  | Give the source of funding and the role of the funders for the present study and, if applicable, for the original study on which the present article is based                                                                                                                                   | 15                                            |

\*Give information separately for cases and controls in case-control studies and, if applicable, for exposed and unexposed groups in cohort and cross-sectional studies.

**Note:** An Explanation and Elaboration article discusses each checklist item and gives methodological background and published examples of transparent reporting. The STROBE checklist is best used in conjunction with this article (freely

1  
2  
3  
4  
5  
6  
7  
8  
9  
10  
11  
12  
13  
14  
15  
16  
17  
18  
19  
20  
21  
22  
23  
24  
25  
26  
27  
28  
29  
30  
31  
32  
33  
34  
35  
36  
37  
38  
39  
40  
41  
42  
43  
44  
45  
46  
47  
48  
49  
50  
51  
52  
53  
54  
55  
56  
57  
58  
59  
60

available on the Web sites of PLoS Medicine at <http://www.plosmedicine.org/>, Annals of Internal Medicine at <http://www.annals.org/>, and Epidemiology at <http://www.epidem.com/>). Information on the STROBE Initiative is available at [www.strobe-statement.org](http://www.strobe-statement.org).

For peer review only



# BMJ Open

## Family satisfaction with critical care in the United Kingdom: a multi-centre cohort study

|                                 |                                                                                                                                                                                                                                                                                                                                                                                                                                                                                                                                                                                                                                                                                                                                                                                                                                                                                                                                                                                                                                                                                                                                                          |
|---------------------------------|----------------------------------------------------------------------------------------------------------------------------------------------------------------------------------------------------------------------------------------------------------------------------------------------------------------------------------------------------------------------------------------------------------------------------------------------------------------------------------------------------------------------------------------------------------------------------------------------------------------------------------------------------------------------------------------------------------------------------------------------------------------------------------------------------------------------------------------------------------------------------------------------------------------------------------------------------------------------------------------------------------------------------------------------------------------------------------------------------------------------------------------------------------|
| Journal:                        | <i>BMJ Open</i>                                                                                                                                                                                                                                                                                                                                                                                                                                                                                                                                                                                                                                                                                                                                                                                                                                                                                                                                                                                                                                                                                                                                          |
| Manuscript ID                   | bmjopen-2019-028956.R2                                                                                                                                                                                                                                                                                                                                                                                                                                                                                                                                                                                                                                                                                                                                                                                                                                                                                                                                                                                                                                                                                                                                   |
| Article Type:                   | Research                                                                                                                                                                                                                                                                                                                                                                                                                                                                                                                                                                                                                                                                                                                                                                                                                                                                                                                                                                                                                                                                                                                                                 |
| Date Submitted by the Author:   | 05-Jul-2019                                                                                                                                                                                                                                                                                                                                                                                                                                                                                                                                                                                                                                                                                                                                                                                                                                                                                                                                                                                                                                                                                                                                              |
| Complete List of Authors:       | Ferrando, Paloma; Intensive Care National Audit and Research Centre, Gould, Doug; Intensive Care National Audit and Research Centre Walmsley, Emma; Intensive Care National Audit and Research Centre Richards-Belle, Alvin; Intensive Care National Audit and Research Centre Canter, Ruth; Intensive Care National Audit and Research Centre Saunders, Steven; Intensive Care National Audit and Research Centre Harrison, David; Intensive Care National Audit and Research Centre Harvey, Sheila; London School of Hygiene & Tropical Medicine, Global Health and Development Heyland, Daren; Kingston General Hospital, Clinical Evaluation Research Unit; Queens University, Department of Critical Care Medicine Hinton, Lisa; University of Oxford, Health Experiences Research Group, Nuffield Department of Primary Care Health Sciences McColl, Elaine; Newcastle University Institute for Health and Society Richardson, Annette; Freeman Hospital, Perioperative and Critical Care Richardson, Michael Wright, Stephen; Freeman Hospital, Perioperative and Critical Care Rowan, Kathryn; Intensive Care National Audit and Research Centre |
| <b>Primary Subject Heading</b>: | Intensive care                                                                                                                                                                                                                                                                                                                                                                                                                                                                                                                                                                                                                                                                                                                                                                                                                                                                                                                                                                                                                                                                                                                                           |
| Secondary Subject Heading:      | Patient-centred medicine                                                                                                                                                                                                                                                                                                                                                                                                                                                                                                                                                                                                                                                                                                                                                                                                                                                                                                                                                                                                                                                                                                                                 |
| Keywords:                       | Adult intensive & critical care < ANAESTHETICS, Quality in health care < HEALTH SERVICES ADMINISTRATION & MANAGEMENT, Family satisfaction                                                                                                                                                                                                                                                                                                                                                                                                                                                                                                                                                                                                                                                                                                                                                                                                                                                                                                                                                                                                                |
|                                 |                                                                                                                                                                                                                                                                                                                                                                                                                                                                                                                                                                                                                                                                                                                                                                                                                                                                                                                                                                                                                                                                                                                                                          |

SCHOLARONE™  
Manuscripts

# Family satisfaction with critical care in the United Kingdom: a multi-centre cohort study

## Authors

Paloma Ferrando-Vivas, *statistician*<sup>1</sup>, Doug W Gould, *senior researcher*<sup>1</sup>, Emma Walmsley, *study co-ordinator*<sup>1</sup>, Alvin Richards-Belle, *trial manager*<sup>1</sup>, Ruth R Canter, *research assistant*<sup>1</sup>, Steven Saunders, *research administrator*<sup>1</sup>, David A Harrison, *head statistician*<sup>1</sup>, Sheila E Harvey, *associate professor*<sup>2</sup>, Daren K Heyland, *director of the Kingston General Hospital Clinical Evaluation Research Unit and professor of medicine and epidemiology*<sup>3</sup>, Lisa Hinton, *senior qualitative researcher*<sup>4</sup>, Elaine McColl, *professor of health services research*<sup>5</sup>, Annette Richardson, *nurse consultant in critical care*<sup>6</sup>, Michael Richardson, *patient public representative*<sup>7</sup>, Stephen E Wright, *consultant in anaesthesia and intensive care*<sup>6</sup>, Kathryn M Rowan, *director of scientific & strategic development*<sup>1</sup>.

<sup>1</sup>Intensive Care National Audit & Research Centre (ICNARC), London, United Kingdom, WC1V 6AZ

<sup>2</sup>London School of Hygiene & Tropical Medicine, Global Health and Development, London, United Kingdom

<sup>3</sup>Kingston General Hospital, Clinical Evaluation Research Unit, Kingston, Canada and Queen's University, Department of Critical Care Medicine, School of Medicine, Canada.

<sup>4</sup> University of Oxford, Health Experiences Research Group, Nuffield Department of Primary Care Health Sciences, Oxford, United Kingdom.

Institute of Health and Society, Newcastle University, Newcastle upon Tyne, United Kingdom.

<sup>6</sup>Freeman Hospital, Perioperative and Critical Care, Newcastle Upon Tyne Hospitals NHS Foundation Trust, Newcastle upon Tyne, United Kingdom.

<sup>7</sup>Newcastle Upon Tyne, United Kingdom.

## Corresponding author:

Kathryn M. Rowan (ORCID iD: 0000 0001 8217 5602), Director of Scientific & Strategic Development, Intensive Care National Audit & Research Centre, Napier House, 24 High Holborn, London WC1V 6AZ

Tel: 020 7831 6878

Fax: 020 7831 6879

e-mail: [Kathy.rowan@icnarc.org](mailto:Kathy.rowan@icnarc.org)

## Abstract

**Objective:** To assess family satisfaction with intensive care units (ICUs) in the United Kingdom using the Family Satisfaction in the Intensive Care Unit 24-item questionnaire (FS-ICU-24), and to investigate how characteristics of patients and their family members impact on family satisfaction.

**Design:** Prospective cohort study nested within a national clinical audit database.

**Setting:** Stratified, random sample of 20 adult general ICUs participating in the Intensive Care Audit & Research Centre (ICNARC) Case Mix Programme.

**Participants:** Family members of patients staying at least 24 hours in ICU were recruited between May 2013 and June 2014.

**Interventions:** Consenting family members were sent a postal questionnaire three weeks after the patient died or was discharged from ICU. Up to four family members were recruited per patient.

**Main outcome measures:** Family satisfaction measured using the FS-ICU-24 questionnaire.

**Main Results:** 12,346 family members of 6,380 patients were recruited and 7,173 (58%) family members of 4,615 patients returned a completed questionnaire. Overall and domain specific family satisfaction scores were high (mean overall family satisfaction 80, satisfaction with care 83, satisfaction with information 76, and satisfaction with decision-making 73 out of 100) but varied significantly across adult general ICUs studied and by whether the patient survived ICU. For family members of ICU survivors, characteristics of both family member (age, ethnicity, relationship to patient (next-of-kin and/or lived with patient) and visit frequency) and the patient (acute severity of illness and receipt of invasive mechanical ventilation) were significant determinants of family satisfaction, whereas, for family members of ICU non-survivors, only patient characteristics (age, acute severity of illness, and duration of stay) were significant.

**Conclusions:** Overall family satisfaction in UK adult general ICUs was high but varied significantly. Adjustment for differences in family member/patient characteristics is important to avoid falsely identifying ICUs as statistical outliers.

**Study registration:** ISRCTN 47363549

1  
2  
3 **Keywords:** critical care; intensive care units; personal satisfaction; family; quality of care;  
4 communication  
5  
6  
7  
8  
9

### 10 11 **Strengths and limitations of this study**

- 12
- 13 • This is the largest study assessing family satisfaction with ICU care.
- 14 • Unbiased selection and stratification of participating units ensured geographical
- 15 spread (north, south, east, and west England, Wales and Northern Ireland), hospital
- 16 type (university or non-university) and ICUs of different sizes (large or small – based
- 17 on number of beds) that recruited for one year to avoid bias from seasonal variation.
- 18 • Nesting our study within the Case Mix Programme national clinical audit was efficient
- 19 and allowed for linkage of family members' to patient data.
- 20 • The same mode and timing of delivery of the FS-ICU-24 was employed for family
- 21 members of ICU survivors and non-survivors, avoiding potential sampling bias and
- 22 allowing for meaningful comparisons between these groups.
- 23 • Despite our very large sample size, we achieved a modest response rate (58%), which
- 24 was in line with previous published studies.
- 25  
26  
27  
28  
29  
30

## Introduction

Humanity of health care, often measured as patient experience, is increasingly seen as one of the three pillars of quality, alongside effectiveness and equity. Eliciting the views and experiences of patients is now seen as essential in delivering a high quality service (1). However, given that approximately 20% of patients admitted to intensive care units (ICUs) die and survivors are often unable to recall their experiences, measuring patient experience in ICU has particular challenges. For this reason, measures of family experience have been developed to help understand the humanity of ICU care.

The most widely validated measure of family experience is the Family Satisfaction in the Intensive Care Unit questionnaire (FS-ICU)(2). This describes satisfaction, overall and in two domains – *satisfaction with care* and *satisfaction with decision making* (3-5). Family satisfaction reflects the extent to which perceived needs and expectations of family members are met by health-care professionals, and may be influenced by a number of factors including families' expectations, information and communication, family-related factors (such as attitudes towards life and death, social, cultural and religious backgrounds, etc.), patient-related factors (such as illness severity and whether the patient survives the ICU), hospital infrastructure, and process of care.(4, 6, 7)

This paper reports the results of a large, prospective, multicentre, cohort study describing family satisfaction with ICU care in the UK. The overall aim of the Family-Reported Experiences Evaluation (FREE) study was to inform the potential routine use of the FS-ICU-24 questionnaire for quality improvement in adult general ICUs in the UK. Specific aims were to investigate how characteristics of patients and their family members impact on family satisfaction, and to explore how family satisfaction varies across ICUs, before and after adjustment for family member and patient characteristics identified as being associated with family satisfaction.

## Methods

This large, prospective, multicentre cohort study was nested in the Intensive Care National Audit & Research Centre (ICNARC) Case Mix Programme (CMP) – the national clinical audit of adult general ICUs in England, Wales and Northern Ireland. A stratified sample of 20 ICUs were selected to ensure geographical spread (north, south, east, and west England, Wales and Northern Ireland), hospital type (university or non-university) and ICUs of different sizes (large or small – based on number of beds) and recruited for one year to avoid bias from seasonal variation. In accordance with care standards for UK ICUs at the time of data collection, nurse/patient ratios were 1:1 and 1:2 for Level 3 (Intensive

Care) and Level 2 (High Dependency) patients, respectively. The study was reviewed and approved by the National Research Ethics Service Committee South Central - Berkshire B (reference 13/SC/0037) and was registered prospectively (ISRCTN47363549).

### **Patient and Public Involvement**

Engagement with patient and their family members was vital to ensuring the successful delivery of the FREE study. A former ICU patient and a family member of a former ICU patient were co-investigators on the FREE study and contributed to all aspects of the study including: design; conduct; management; analysis; interpretation of results; and dissemination as members of the study management group. Additionally, the study steering committee included patient and family members.

### **Recruitment and follow-up**

Recruitment and follow-up of family members have been described in detail elsewhere (8). Briefly, a 'family member' was defined as any person with close familial, social or emotional relationship to the patient and was not restricted solely to next-of-kin. Up to four family members of patients who spent >24 hours in ICU were eligible to participate if they met the following criteria: aged  $\geq 18$  years; had physically visited the patient's bedside at least once after the first 24 hours; had a UK postal address; and had not already been recruited into the study.

Patients were followed-up to ICU discharge. Approximately three weeks after the patient had either been discharged from or died in the ICU, a questionnaire pack was mailed to their recruited and consented family member(s) direct from the ICNARC Clinical Trials Unit. Data from completed questionnaires were entered centrally onto a secure database. All identifiable information such as names (e.g. of patients, family members, and ICU staff members) were removed. Quality checking of entered data was conducted and, for a 20% random sample, accuracy was verified. All fields in the database with missing data were verified against the paper questionnaires.

### **Statistical analysis**

Item responses were rescaled and, where relevant, reversed, according to the developer's rules, so that each response was on a scale from 0 (least satisfied) to 100 (most satisfied) (5). Recent work from our group (9) established the construct validity of the FS-ICU 24-item questionnaire (FS-ICU-24) was improved by using three domains (splitting the *satisfaction with decision making* domain into two – *satisfaction with information* and *satisfaction with decision making process*). Overall family satisfaction score and three domain scores were calculated by averaging the item responses for the relevant items.

1  
2  
3 Family member and patient characteristics were described by mean and standard deviation (SD),  
4 median and quartiles, or number and percentage stratified by the patient outcome (alive/dead).  
5 Variation in family satisfaction was analysed across the following factors: patient; family member;  
6 ICU/hospital (hospital teaching status and number of beds in the ICU); and other contextual.  
7  
8  
9

10  
11 These factors were then explored using univariable and multivariable multilevel linear regression  
12 models (10) with a primary outcome of the overall family satisfaction score. Family member level and  
13 patient level variables that were statistically significant in the univariable models along with a priori  
14 key family member/patient variables (age, sex), were carried forward to the multivariable multilevel  
15 modelling process. (8) To reflect likely differences in the associations between factors and outcomes,  
16 separate models were fitted for family members of ICU survivors and non-survivors.  
17  
18  
19  
20  
21  
22

23 After modelling, the normality of error assumption was assessed by measurements of skewness.  
24 Normal probability plots were also used to assess the distribution of residuals at each level. As a  
25 sensitivity analysis we ran a multilevel regression model on the square root of the score using the  
26 same set of variables to confirm inference. In secondary analyses, separate models were fitted for the  
27 three individual domains of family satisfaction. All analyses were conducted in Stata/SE Version 13.0  
28 (StataCorp, College Station, TX).  
29  
30  
31  
32  
33  
34

35 Variation in family satisfaction across ICUs was assessed graphically using funnel plots, which plot the  
36 average family satisfaction score for each critical care unit against the number of family members  
37 returning questionnaires. Control limits placed at 2 and 3 SDs around the overall mean indicate the  
38 regions of the funnel within which we would expect 95% and 99.8% of points to lie if all variation was  
39 due to chance (11).  
40  
41  
42  
43

44 Due to the natural structure of the data and the planned analysis multilevel multiple imputation  
45 (MLMI) was used to complete non- and partial responses for outcomes and family member  
46 characteristics. Data were imputed using REALCOM-Impute, an MLwiN 2.15 macro that generates  
47 imputations for hierarchical data (12). To test whether our findings were influenced by using imputed  
48 data, we also conducted sensitivity analyses using a traditional approach to scoring the FS-ICU-24 by  
49 including only responders with  $\geq 60\%$  of items completed. All analyses were conducted in accordance  
50 with a pre-defined statistical analysis plan and reported in line with the Strengthening the Reporting  
51 of Observational Studies in Epidemiology (STROBE) guidance on the analysis of observational  
52 studies.(13)  
53  
54  
55  
56  
57  
58  
59  
60

## Results

Of the 210 adult, general ICUs participating in the CMP, 142 (67.6%) expressed an interest in participating and the 20 ICUs were selected using stratified, random sampling. The characteristics and outcomes of all admissions to the study ICUs were similar to admissions to all ICUs in the CMP during the same period (Supplementary Table S1).

Between 28 May 2013 and 30 June 2014, 18,757 patients were admitted to the 20 ICUs, of whom 12,730 patients stayed at least 24 hours in the ICU. From these, 12,346 family members of 6380 patients were recruited. Fully or partially completed questionnaires were returned by 7173 family members of 4615 patients. Family members of patients for whom no CMP data were available were not included, so finally, 7019 were included in the final analysis (Supplementary Figure S1).

Response rates varied by family member characteristics, including; age, gender, ethnicity, level of deprivation (based on residential postcode), level of education, and relationship with the patient. Family members documented in ICU records as next-of-kin were more likely to complete the questionnaire than those who were not, whilst family members for whom English was their first language were more likely to complete the questionnaire than those for whom it was not (Table S2).

A detailed description of the inclusion process, response rates and responders' characteristics has been reported in Family Reported Experiences Evaluation (FREE) study report (8). Comparisons of family member and patient characteristics for ICU survivors and non-survivors are presented in Table 1 and Table 2, respectively.

Table 1 Family member characteristics stratified by the patient's ICU outcome

| Family member characteristics | All Family members<br>[N=7,019] | Family members of ICU survivors[N=6,149] | Family members of ICU non-survivors<br>[N=870] |
|-------------------------------|---------------------------------|------------------------------------------|------------------------------------------------|
| Age, mean (SD)                | 54 (15.1)                       | 54 (15.0)                                | 52 (15.2)                                      |
| Age group, n (%)              |                                 |                                          |                                                |
| <30                           | 507 (7.5)                       | 439 (7.4)                                | 68 (8.0)                                       |
| 30-39                         | 701 (10.3)                      | 595 (10.0)                               | 106 (12.5)                                     |
| 40-49                         | 1,423 (21.0)                    | 1,245 (21.0)                             | 178 (21.0)                                     |
| 50-59                         | 1,614 (23.8)                    | 1,406 (23.7)                             | 208 (24.6)                                     |
| 60-69                         | 1,507 (22.2)                    | 1,334 (22.5)                             | 173 (20.4)                                     |
| 70-79                         | 827 (12.2)                      | 747 (12.6)                               | 80 (9.5)                                       |
| 80+                           | 204 (3.0)                       | 171 (2.9)                                | 33 (3.9)                                       |
| Sex, n (%)                    |                                 |                                          |                                                |
| Male                          | 2,327 (33.5)                    | 2,052 (33.7)                             | 275 (31.9)                                     |
| Female                        | 4,622 (66.5)                    | 4,034 (66.3)                             | 588 (68.1)                                     |
| Ethnicity, n (%)              |                                 |                                          |                                                |



|                                                          |                  |              |            |
|----------------------------------------------------------|------------------|--------------|------------|
| White                                                    | 6,555 (94.0)     | 5,738 (93.9) | 817 (94.6) |
| Asian                                                    | 138 (2.0)        | 114 (1.9)    | 24 (2.8)   |
| Black                                                    | 54 (0.8)         | 50 (0.8)     | 4 (0.5)    |
| Mixed ethnicity or other ethnic group                    | 88 (1.3)         | 84 (1.4)     | 4 (0.5)    |
| Not stated                                               | 139 (2.0)        | 124 (2.0)    | 15 (1.7)   |
| Relationship to patient, n (%) ("I am the patient's...") |                  |              |            |
| Partner                                                  | 2,096 (29.9)     | 1,891 (30.8) | 205 (23.6) |
| Child                                                    | 654 (9.3)        | 1,893 (30.8) | 346 (39.8) |
| Parent                                                   | 2,239 (31.9)     | 622 (10.1)   | 32 (3.7)   |
| Sibling                                                  | 704 (10.0)       | 624 (10.1)   | 80 (9.2)   |
| Other relative                                           | 969 (13.8)       | 799 (13.0)   | 170 (19.5) |
| Other non-relative                                       | 356 (5.1)        | 319 (5.2)    | 37 (4.3)   |
| Next-of-kin, n (%)                                       | 3,520 (50.2)     | 3,153 (51.4) | 367 (42.3) |
| Lives with patient, n (%)                                | 2,559 (36.5)     | 2,311 (37.6) | 248 (28.5) |
| Highest level of education, n (%)                        |                  |              |            |
| NVQ level 1 or 2                                         | 1,683 (28.9)     | 1,465 (28.9) | 218 (29.1) |
| NVQ level 3                                              | 1,123 (19.3)     | 989 (19.5)   | 134 (17.9) |
| NVQ level 4 or 5                                         | 1,769 (30.4)     | 1,537 (30.3) | 232 (31.0) |
| Other                                                    | 1,244 (21.4)     | 1,080 (21.3) | 164 (21.9) |
| Quintile of deprivation, n (%)                           |                  |              |            |
| 1 (least deprived)                                       | 1,190 (17.1)     | 1,164 (19.9) | 159 (19.4) |
| 2                                                        | 1,405 (20.2)     | 1,281 (21.9) | 181 (22.1) |
| 3                                                        | 1,488 (21.4)     | 1,238 (21.1) | 181 (22.1) |
| 4                                                        | 1,488 (21.4)     | 1,189 (20.3) | 169 (20.7) |
| 5 (most deprived)                                        | 1,391 (20.0)     | 989 (16.9)   | 128 (15.6) |
| Distance (km) from home to hospital, median (IQR)        | 12.4 (5.4, 33.6) | 12 (6, 34)   | 12 (5, 33) |
| Previous experience of ICU as a family member, n (%)     | 1,841 (26.6)     | 1,641 (27.1) | 200 (23.3) |
| Frequent visitor, n (%)                                  | 5,403 (78.9)     | 4,713 (78.6) | 690 (81.2) |

NVQ, National Vocational Qualification level 1 or 2, equivalent to GCSE or O-level (school exams taken at age 16); NVQ level 3, equivalent to A-level, AS-level or High School Certificate (school exams taken at age 18); NVQ level 4 or 5, equivalent to degree, Higher degree, Higher National Certificate, Higher National Diploma.

Table 2 Patient characteristics stratified by ICU outcome

| Patient characteristics | All patients<br>[N=4,506] | ICU survivors<br>[N=4,007] | ICU non-survivors<br>[N=499] |
|-------------------------|---------------------------|----------------------------|------------------------------|
| Age, mean (SD)          | 63 (17.0)                 | 63 (17.3)                  | 68 (13.2)                    |
| Age group, n (%)        |                           |                            |                              |
| <30                     | 254 (5.6)                 | 246 (6.1)                  | 8 (1.6)                      |
| 30-39                   | 232 (5.1)                 | 223 (5.6)                  | 9 (1.8)                      |
| 40-49                   | 412 (9.1)                 | 384 (9.6)                  | 28 (5.6)                     |
| 50-59                   | 643 (14.3)                | 586 (14.6)                 | 57 (11.4)                    |
| 60-69                   | 1,100 (24.4)              | 966 (24.1)                 | 134 (26.9)                   |
| 70-79                   | 1,159 (25.7)              | 1,003 (25.0)               | 156 (31.3)                   |

|                                                              |                                          |                |                 |
|--------------------------------------------------------------|------------------------------------------|----------------|-----------------|
| 80+                                                          | 706 (15.7)                               | 599 (14.9)     | 107 (21.4)      |
| <b>Sex, n (%)</b>                                            |                                          |                |                 |
| Male                                                         | 2,561 (56.8)                             | 2,264 (56.5)   | 297 (59.5)      |
| Female                                                       | 1,945 (43.2)                             | 1,743 (43.5)   | 202 (40.5)      |
| <b>Ethnicity, n (%)</b>                                      |                                          |                |                 |
| White                                                        | 4,176 (92.7)                             | 3,706 (92.5)   | 470 (94.2)      |
| Asian or Asian British                                       | 81 (1.8)                                 | 69 (1.7)       | 12 (2.4)        |
| Black or black British                                       | 42 (0.9)                                 | 39 (1.0)       | 3 (0.6)         |
| Mixed ethnicity or other ethnic group                        | 79 (1.8)                                 | 74 (1.8)       | 5 (1.0)         |
| Not stated                                                   | 128 (2.8)                                | 119 (3.0)      | 9 (1.8)         |
| <b>Quintile of deprivation, n (%)</b>                        |                                          |                |                 |
| 1 (least deprived)                                           | 774 (17.3)                               | 690 (17.4)     | 84 (17)         |
| 2                                                            | 905 (20.3)                               | 812 (20.4)     | 93 (18.8)       |
| 3                                                            | 928 (20.8)                               | 822 (20.7)     | 106 (21.4)      |
| 4                                                            | 950 (21.3)                               | 841 (21.2)     | 109 (22)        |
| 5 (most deprived)                                            | 912 (20.4)                               | 809 (20.4)     | 103 (20.8)      |
| Distance (km) from home to hospital,<br>median (IQR)         | 33.1 (67.8) 9.3<br>(4.3 19.9)<br>[4,475] | 10 (4, 20)     | 8 (4, 16)       |
| <b>APACHE II severe co-morbidities, n (%)</b>                |                                          |                |                 |
| Liver                                                        | 124 (2.8)                                | 94 (2.3)       | 30 (6.0)        |
| Renal                                                        | 108 (2.4)                                | 97 (2.4)       | 11 (2.2)        |
| Respiratory                                                  | 146 (3.2)                                | 119 (3.0)      | 27 (5.4)        |
| Cardiovascular                                               | 117 (2.6)                                | 100 (2.5)      | 17 (3.4)        |
| Metastatic cancer                                            | 121 (2.7)                                | 110 (2.7)      | 11 (2.2)        |
| Haematological malignancy                                    | 103 (2.3)                                | 81 (2.0)       | 22 (4.4)        |
| Immunocompromise                                             | 369 (8.2)                                | 318 (7.9)      | 51 (10.2)       |
| <b>Prior dependency, n (%)</b>                               |                                          |                |                 |
| Able to live without assistance                              | 3,267 (72.5)                             | 2,944 (73.5)   | 323 (64.7)      |
| Minor or major assistance                                    | 1,171 (26.0)                             | 1,004 (25.1)   | 167 (33.5)      |
| Total assistance                                             | 47 (1.0)                                 | 42 (1.0)       | 5 (1.0)         |
| Unknown                                                      | 21 (0.5)                                 | 17 (0.4)       | 4 (0.8)         |
| <b>Surgical status n (%)</b>                                 |                                          |                |                 |
| Non-surgical                                                 | 2,808 (62.3)                             | 2,396 (59.8)   | 412 (82.6)      |
| Planned admission following elective<br>or scheduled surgery | 702 (15.6)                               | 686 (17.1)     | 16 (3.2)        |
| Unplanned admission following<br>surgery of any urgency      | 996 (22.1)                               | 925 (23.1)     | 71 (14.2)       |
| ICNARC Physiology Score, mean (SD)                           | 18 (8.3)                                 | 18 (7.9)       | 26 (8.1)        |
| APACHE II Score, mean (SD)                                   | 17 (6.3)                                 | 16 (6.1)       | 21 (6.2)        |
| ICU length of stay (days), median (IQR)                      | 4.9 (2.9 9.1)                            | 4.8 (2.8, 9.0) | 6.0 (3.6, 10.6) |
| <b>Organ support received in the ICU, n (%)</b>              |                                          |                |                 |
| Advanced respiratory support                                 | 2,540 (56.4)                             | 2,124 (53.0)   | 416 (83.4)      |
| Advanced cardiovascular support                              | 1,325 (29.4)                             | 1,037 (25.9)   | 288 (57.7)      |

|                                                                                           |               |            |            |
|-------------------------------------------------------------------------------------------|---------------|------------|------------|
| Renal support                                                                             | 691 (15.3)    | 510 (12.7) | 181 (36.3) |
| Neurological support <sup>a</sup>                                                         | 617 (13.7)    | 503 (12.6) | 114 (22.8) |
| Duration (calendar days) of organ support among those receiving the support, median (IQR) |               |            |            |
| Advanced respiratory support                                                              | 5.0 (2.0 9.0) | 4 (2, 9)   | 6 (4, 10)  |
| Advanced cardiovascular support                                                           | 3.0 (2.0 4.0) | 2 (2, 4)   | 3 (2, 5)   |
| Renal support                                                                             | 4.0 (3.0 8.0) | 4 (3, 8)   | 4 (3, 8)   |
| Neurological support                                                                      | 3.0 (2.0 7.0) | 3 (2, 7)   | 3 (2, 5)   |
| Death before acute hospital discharge, n (%)                                              | 852 (19.2)    | 353 (8.9)  | N/A        |

<sup>a</sup> including admission receiving invasive neurological monitoring or treatment, continuous intravenous medication for seizures and/or cerebral monitoring, and therapeutic hypothermia using protocols and devices

Both overall and individual domain scores revealed generally high satisfaction (Table 3), however a long tail was present indicating some questionnaires were returned with very low scores (Figure 1). Family members of ICU non-survivors had higher scores for overall satisfaction and satisfaction with the decision-making process domain than family members of ICU survivors.

Table 3 Overall family satisfaction score for all family members and for family members by patient outcome

| Summary measures                                  | All family members<br>[N=7,017 <sup>a</sup> ] | Family members of ICU<br>survivors [N=6,147 <sup>a</sup> ] | Family members of<br>ICU non-survivors<br>[N=870] |
|---------------------------------------------------|-----------------------------------------------|------------------------------------------------------------|---------------------------------------------------|
| Overall family satisfaction score                 |                                               |                                                            |                                                   |
| <b>Median [IQR]</b>                               | 83.3 [70.4, 93.0]                             | 82.7 [69.9, 92.7]                                          | 87.1 [74.4, 94.8]                                 |
| <b>Mean (SD)</b>                                  | 79.7 (16.7)                                   | 79.3 (16.5)                                                | 82.0 (17.5)                                       |
| <b>[95% CI]</b>                                   | [79.2 - 80.1]                                 | [78.9 - 79.8]                                              | [80.9 - 83.2]                                     |
| <i>Satisfaction with care</i> domain score        |                                               |                                                            |                                                   |
| <b>Median [IQR]</b>                               | 87.5 [74.3, 96.4]                             | 87.5 [73.6, 96.4]                                          | 88.1 [76.8, 96.4]                                 |
| <b>Mean (SD)</b>                                  | 83.1 (16.0)                                   | 83.0 (15.9)                                                | 83.8 (16.9)                                       |
| <b>[95% CI]</b>                                   | [82.7 - 83.4]                                 | [82.6 - 83.4]                                              | [82.7 - 84.9]                                     |
| <i>Satisfaction with information</i> domain score |                                               |                                                            |                                                   |
| <b>Median [IQR]</b>                               | 79.2 [66.7, 95.8]                             | 79.2 [62.5, 95.8]                                          | 83.3 [70.8, 100.0]                                |
| <b>Mean (SD)</b>                                  | 76.2 (22.0)                                   | 75.7 (22.0)                                                | 79.6 (22.9)                                       |
| <b>[95% CI]</b>                                   | [75.7 - 76.7]                                 | [75.1 - 76.2]                                              | [78.1 - 81.0]                                     |

---

*Satisfaction with the decision-making process domain score*


---

|                     |                   |                   |                    |
|---------------------|-------------------|-------------------|--------------------|
| <b>Median [IQR]</b> | 75.6 [59.3, 93.1] | 75.0 [57.5, 88.8] | 87.5 [68.8, 100.0] |
| <b>Mean (SD)</b>    | 73.1 (22.3)       | 72.1 (22.0)       | 79.6 (22.9)        |
| <b>[95% CI]</b>     | [72.5 - 73.6]     | [71.6 - 72.7]     | [78.1 - 81.1]      |

---

<sup>a</sup> Two family members returned questionnaires but did not complete any of the 24 FS-ICU items – responses were not imputed for these family members.

Univariable analyses of the association between family satisfaction and family characteristics, patient characteristics, ICU/hospital characteristics and contextual factors are shown in the Supplementary Appendix (Table S3-S5). There was no evidence of differences in family satisfaction according to hospital teaching status or the number of beds in the ICU, however, these variables were retained in the multilevel multivariable models due to their controlling effect on the other coefficients in the models. A summary of the candidate variables considered in the models and a justification of their inclusion/exclusion is detailed in Table S6.

Results of the multivariable multilevel models for overall family satisfaction are shown in

Table 4. Among family members of ICU survivors, there was evidence of an association with overall family satisfaction for: family member age group; family member ethnicity; next-of-kin/lives with patient; frequency of visits; ICNARC Physiology Score; and receipt of advanced respiratory support. Among family members of non-survivors, only the following patient factors were significant: patient age; ICNARC Physiology Score; and ICU length of stay. These associations were significant when controlling for other predictors in the model. A priori-specified interaction terms and random slopes did not improve the fit of the models and so these terms were not retained.

Table 4 Multivariable multilevel models for overall family satisfaction score

| Variables                           | Family members of ICU survivors<br>[N=6,143 <sup>a</sup> ] |                |         | Family members of ICU non-survivors<br>[N=869 <sup>a</sup> ] |                |         |
|-------------------------------------|------------------------------------------------------------|----------------|---------|--------------------------------------------------------------|----------------|---------|
|                                     | Coef.                                                      | 95% CI         | p-value | Coef.                                                        | 95% CI         | p-value |
| Fixed effects – family member level |                                                            |                |         |                                                              |                |         |
| Constant                            | 68.30                                                      | (63.42, 73.17) |         | 55.70                                                        | (42.26, 69.14) |         |
| Family member age, years (vs <30)   |                                                            |                | 0.041   |                                                              |                | 0.18    |
| 30-39                               | 1.97                                                       | (0.11, 3.82)   |         | 2.01                                                         | (-2.64, 6.66)  |         |
| 40-49                               | 1.65                                                       | (0.02, 3.29)   |         | 3.37                                                         | (-1.01, 7.75)  |         |

1  
2  
3  
4  
5  
6  
7  
8  
9  
10  
11  
12  
13  
14  
15  
16  
17  
18  
19  
20  
21  
22  
23  
24  
25  
26  
27  
28  
29  
30  
31  
32  
33  
34  
35  
36  
37  
38  
39  
40  
41  
42  
43  
44  
45  
46  
47  
48  
49  
50  
51  
52  
53  
54  
55  
56  
57  
58  
59  
60

|                                                        |       |                |        |               |                       |
|--------------------------------------------------------|-------|----------------|--------|---------------|-----------------------|
| 50-59                                                  | 1.96  | (0.35, 3.56)   | 4.12   | (-0.09, 8.33) |                       |
| 60-69                                                  | 1.35  | (-0.31, 3.01)  | 4.26   | (-0.25, 8.79) |                       |
| 70-79                                                  | 1.32  | (-0.52, 3.17)  | 5.92   | (0.69, 11.14) |                       |
| 80+                                                    | -1.34 | (-4.06, 1.37)  | -0.18  | (-6.80, 6.43) |                       |
| Family member sex – female (vs male)                   | 0.32  | (-0.48, 1.12)  | 0.44   | 0.66          | (-1.45, 2.77) 0.54    |
| Family member ethnicity – white (vs non-white)         | 3.59  | (1.38, 5.80)   | 0.001  | 7.12          | (-0.00, 14.25) 0.050  |
| Next-of-kin/lives with patient (vs lives with patient) |       |                | <0.001 |               | 0.26                  |
| Next-of-kin, does not live with patient                | -1.39 | (-2.56, -0.22) | 1.08   | (-2.39, 4.55) |                       |
| Not next-of-kin, does not live with patient            | -2.33 | (-3.26, -1.41) | -1.24  | (-3.88, 1.40) |                       |
| Frequent visitor                                       | 2.83  | (1.82, 3.84)   | <0.001 | 1.53          | (-1.34, 4.39) 0.30    |
| <b>Fixed effects – patient level</b>                   |       |                |        |               |                       |
| Patient age (per 10 years)                             | 0.01  | (-0.28, 0.31)  | 0.93   | 1.18          | (0.09, 2.27) 0.033    |
| Patient sex – female (vs male)                         | 0.26  | (-0.73, 1.25)  | 0.61   | 1.92          | (-0.85, 4.70) 0.17    |
| Dependency (vs none)                                   |       |                | 0.15   |               | 0.74                  |
| Minor or major                                         | -0.30 | (-1.60, 1.00)  |        | -0.22         | (-3.36, 2.92)         |
| Total                                                  | -4.62 | (-9.32, 0.07)  |        | 4.98          | (-8.10, 18.07)        |
| Surgical status (vs non-surgical)                      |       |                | 0.63   |               | 0.82                  |
| Planned elective/scheduled                             | -0.74 | (-2.24, 0.77)  |        | -2.61         | (-10.77, 5.54)        |
| Unplanned                                              | -0.26 | (-1.46, 0.94)  |        | -0.08         | (-3.95, 3.80)         |
| ICNARC Physiology Score (per point)                    | 0.16  | (0.09, 0.24)   | <0.001 | 0.17          | (0.00, 0.34) 0.045    |
| ICU length of stay (per day)                           | -0.02 | (-0.07, 0.03)  | 0.44   | -0.30         | (-0.46, -0.15) <0.001 |
| Advanced respiratory support                           | 2.96  | (1.80, 4.11)   | <0.001 | ---           |                       |
| <b>Fixed effects – ICU/hospital level</b>              |       |                |        |               |                       |
| Hospital type (vs non-university)                      |       |                | 0.49   |               | 0.55                  |
| University                                             | 0.86  | (-3.61, 5.32)  |        | -1.51         | (-7.51, 4.50)         |
| University affiliated                                  | 1.97  | (-1.26, 5.20)  |        | 1.77          | (-2.55, 6.09)         |
| Number of ICU beds (per bed)                           | -0.00 | (-0.23, 0.23)  | 0.97   | 0.26          | (-0.08, 0.61) 0.13    |
| <b>Random effects – SD (SE)</b>                        |       |                |        |               |                       |
| Between ICUs                                           | 2.91  | (0.60)         |        | 2.81          | (1.10)                |
| Within ICUs between patients                           | 10.94 | (0.29)         |        | 11.16         | (0.69)                |
| Within patients between family members                 | 11.98 | (0.21)         |        | 12.26         | (0.44)                |
| <b>Variance partition – percentage</b>                 |       |                |        |               |                       |
| Between ICUs                                           | 3%    |                |        | 2%            |                       |
| Between patients                                       | 44%   |                |        | 44%           |                       |

Coef, coefficient; SE, standard error.

<sup>a</sup>Five patients had missing data on age group on both the questionnaire and web portal – due to the very small amount of missing data in this key variable, these missing values were not imputed.

1  
2  
3  
4  
5  
6 Variances at both the patient and ICU/hospital levels were statistically significant but the variance  
7 partition coefficients (VPCs) at the ICU/hospital level were small in both the null and final multilevel  
8 models (4% and 3% for ICU survivors and 2% and 2% for ICU non-survivors, respectively), which means  
9 differences in overall family satisfaction scores were mainly at the patient and family member levels.  
10 Variance at the patient level represented 44% of the total variance in overall family satisfaction in the  
11 final models for family members of both ICU survivors and ICU non-survivors.  
12  
13  
14  
15

16 Full results of the multivariable multilevel models for the domain scores are reported in the  
17 Supplementary Appendix (Table S7-S9).  
18  
19

20 Figure 2 shows the funnel plots for the overall family satisfaction score, before and after adjustment  
21 for family member and patient characteristics from the multivariable multilevel models. Adjusting for  
22 family member and patient characteristics reduced the variability across ICUs, resulting in fewer ICUs  
23 outside the funnel plot control limits but the relative position of ICUs remained the same. Funnel plots  
24 for the individual domain scores before and after adjustment can be found in the Supplementary  
25 Appendix (Figure S2).  
26  
27  
28  
29  
30

### 31 **Sensitivity analyses**

32 Multivariable multilevel models using the square root transformation of the satisfaction scores gave  
33 consistent results. In the models using imputed data, the direction and order of magnitude of  
34 coefficients that were significant were similar to those estimated using the traditional approach to  
35 scoring partially completed questionnaires (Supplementary Appendix, Table S10 and Table S11). On  
36 average, the multiple imputation approach tended to identify larger numbers of potential outliers due  
37 to the larger sample sizes and therefore narrower funnels.  
38  
39  
40  
41  
42  
43  
44  
45  
46

### 47 **Discussion**

48 Overall and domain specific family satisfaction measured with the FS-ICU-24 was high. However, we  
49 found that scores vary significantly across adult general ICUs and that family members of patients who  
50 died in the ICU had higher levels of satisfaction. For family members of ICU survivors, characteristics  
51 of both the family member and the patient were significant determinants of family satisfaction,  
52 whereas, for family members of ICU non-survivors, only patient characteristics were significant.  
53 Adjustment for these family member and patient characteristics reduced the variation in family  
54 satisfaction across ICUs, resulting in fewer ICUs being identified as statistical outliers.  
55  
56  
57  
58  
59  
60

1  
2  
3 While the observational design of the FREE study precludes any causative inferences being made, we  
4 speculate that the higher levels of family satisfaction amongst family members of ICU non-survivors  
5 may be due to a number of factors, either singly or combined, including: greater involvement of the  
6 family in end-of-life decision making; family members of survivors having on-going issues to cope with  
7 following their family member's discharge from ICU; and/or other unknown factors. In order to fully  
8 identify and understand why family members of ICU non-survivors have higher family satisfaction, a  
9 detailed qualitative study is required.  
10  
11  
12  
13  
14

15  
16 The overall satisfaction score was comparable with other published studies employing similar  
17 methods to administer the FS-ICU-24 (14-17). Our findings are also consistent with a study by Wall et  
18 al (6) which identified that families of ICU non-survivors were more satisfied than families of ICU  
19 survivors. Similarly, Stricker et al (7), among a number of patient and ICU level factors studied, found  
20 that increasing acute severity of illness of the patient (evaluated using the SAPS II score) was  
21 associated with increasing satisfaction on the overall family satisfaction score, however, lower  
22 satisfaction was associated with ICU-level characteristics of a written admission/discharge policy and  
23 a higher patient:nurse ratio.  
24  
25  
26  
27  
28  
29

30 It is of note that one of largest magnitude associations in the FREE study was the finding that family  
31 members of white ethnicity, of both ICU survivors and non-survivors, had higher satisfaction than  
32 family members of other ethnicities. Further investigation of this issue is warranted to understand  
33 whether this reflects, for example, either cultural variation in family members' expectations or a need  
34 to engage better and communicate with family members who may not have English as their first  
35 language (17% of family members of other ethnicities indicated that their first language was not  
36 English compared with less than 1% of white ethnicity).  
37  
38  
39  
40  
41  
42

43 Our work has several important strengths. To our knowledge, this is the largest study assessing family  
44 satisfaction with ICU care. Nesting our study within the national clinical audit programme was efficient  
45 and novel and allowed for unbiased selection and stratification of participating units and linkage of  
46 family members' to patient data. One important strength is that the same mode and timing of delivery  
47 of the FS-ICU-24 was employed for family members of ICU survivors and non-survivors, avoiding  
48 potential sampling bias and allowing for meaningful comparisons between these groups. Finally, the  
49 large sample size of family members allowed for robust multilevel multivariable modelling of factors  
50 associated with overall family satisfaction to inform important adjustment of any future assessment  
51 using this questionnaire. Despite our very large sample size, we achieved a modest response rate  
52 (58%), however this was similar to other studies with smaller sample sizes (6, 14).  
53  
54  
55  
56  
57  
58  
59  
60

1  
2  
3 Our study does, however, have limitations. First, when assessing satisfaction, it is not uncommon for  
4 continuous measures to be skewed. Whilst the skewed nature of the satisfaction scores does not  
5 affect the parameter estimates in multilevel models (18, 19) it might cause problems when one is  
6 interested in the significance or in the confidence intervals of the variance terms at higher levels (19).  
7  
8 In our analyses, we corrected the asymptotic standard errors using a robust (Huber/White) estimator  
9 to improve inference and performed a sensitivity analysis using a square root transformation which  
10 did not change our conclusions. Second, by excluding family members of patients who had spent less  
11 than 24 hours on ICU - to ensure that family members had spent long enough on ICU to feel able to  
12 respond to the questionnaire - we may have missed a small group of family members of very sick  
13 patients who died soon after admission to ICU. Third, there were differences in the case mix and  
14 outcome of patients between those who had at least one family member recruited and those who did  
15 not, leading to potential bias in the results. Fourth, we found that younger family members and those  
16 from non-white ethnicities were less likely to respond and important information may have been  
17 missed. Finally, 94% of patients were of white ethnicity, which is above that of the ethnic makeup of  
18 the UK (87%) and may make the overall family satisfaction scores less generalisable to other  
19 ethnicities.  
20  
21

22  
23 In conclusion, this large, prospective, multicentre cohort study indicated that overall family satisfaction  
24 with adult general ICU care in the UK was high. However, our findings indicate that there is scope for  
25 some UK adult general ICUs to improve. Our results suggest that the FS-ICU-24 questionnaire could be  
26 used to audit family satisfaction but adjustment for differences in family member/patient  
27 characteristics is important to avoid falsely identifying ICUs as statistical outliers.  
28  
29  
30  
31  
32  
33  
34  
35  
36  
37  
38  
39  
40  
41  
42  
43  
44  
45  
46  
47  
48  
49  
50  
51  
52  
53  
54  
55  
56  
57  
58  
59  
60



## Acknowledgements

We wish to thank the NIHR Health Services and Delivery Research programme for funding this project.

We also wish to thank all the patients, family members and staff from all the units that participated the study.

### Research staff at sites

C Smalley and R Jacob (Arrowe Park Hospital); S Chau, S A Pearson, K Ellis and R Watmough (Barnsley Hospital); M Faulkner, L Evans and H Robertson (Countess of Chester Hospital); P Wakefield, R Abrahams, N Summers and H Wooldridge (Darent Valley Hospital); H McMillan, S Tyson, K Tantam, S Olver, C Brown and C Tippet (Derriford Hospital); S Moreton, S Jones, A Deeney, J Gibbins and A Oglesby (Dorset County Hospital); C Randell, M Allsop, K Harris, C Scott and C Boyd (Freeman Hospital); E Coughlan, A Jefferies and K Wylie (Manchester Royal Infirmary); C Plowright, C Pegg, L Cooper and T Hatton (Medway Maritime Hospital); P Doble, P Richards, D Bayford and K Adams (Musgrove Park Hospital); J Spimpolo, M Burt and R Pillai (Northampton General Hospital); K A Simeson and S Buckley (Pinderfields Hospital); A Jackson, M Nadolski and H Baker (Royal Devon & Exeter Hospital, Wonford); N Mason, U Gunter and L Roberts (Royal Gwent Hospital); T Evans, E Cooke, M Ogden and P Dark (Salford Royal Hospital); M Cody, F Hogg and D McCahery (South West Acute Hospital); D Dawson, J Mellinghoff, S Prudden, N Poonuth and C Ryan (St George's Hospital); G Mandersloot, A Smith (The Royal London Hospital); S Hagan, L Humphries and E Murphy (Ulster Hospital); E Walker, H Payne and X Zhao (Watford General Hospital); C Edmondson, S Anglesea and H Williams (Wrexham Maelor Hospital).

### Study Steering Committee

Dr Kathleen Daly (independent chair); Andrina Colquoun (independent); Dr Maureen Dalziel; Kirsty Everingham (independent); Doreen Henry (independent); Joan Pearson (independent); Catherine Plowright; Dr Laura Price (independent); Professor Kathryn Rowan; Professor Mervyn Singer (independent); and Dr Stephen Wright.

**Funding:** This project was funded by the National Institute for Health Research (NIHR) Health Services and Delivery Research (HS&DR) Programme (11/2003/56). The funder had no involvement in study design; in collection, analysis and interpretation of data; in the writing of the report; or in the decision to submit the article for publication. The views and opinions expressed therein are those of the authors and do not necessarily reflect those of the HS&DR Programme, NIHR, NHS or the Department of Health.

1  
2  
3 **Competing interests:** Kathryn M Rowan is a member of the NIHR HS&DR Board. Elaine McColl was an  
4 editor for the NIHR Journals Library between 2013 and 2016 and her employers received a fee for this  
5 work. The other authors declare no conflicts of interest. All authors have completed the Unified  
6 Competing Interest form (available on request from the corresponding author).  
7  
8  
9

10 **Data sharing:** data can be obtained from the corresponding author on request  
11  
12

13 **Authors contributions:** KMR as Chief Investigator conceived the idea and designed the study with DAH,  
14 SHE, DKH, LH, EMc, MR, AR, and SEW. EW co-ordinated the study and contributed to data acquisition  
15 with ARB, RRC, SS, SHE, AR, and SEW. PFV, DWG, DAH, SHE, DKH, LH, EMc, MR, SEW, and KMR were  
16 involved in the analysis and interpretation of the results. All authors were involved in drafting, editing  
17 and have approved the final manuscript.  
18  
19  
20  
21  
22  
23  
24  
25  
26  
27  
28  
29  
30  
31  
32  
33  
34  
35  
36  
37  
38  
39  
40  
41  
42  
43  
44  
45  
46  
47  
48  
49  
50  
51  
52  
53  
54  
55  
56  
57  
58  
59  
60

## References

1. Black N, Jenkinson C. Measuring patients' experiences and outcomes. *BMJ*. 2009;339:b2495.
2. van den Broek JM, Brunsveld-Reinders AH, Zedlitz AM, et al. Questionnaires on Family Satisfaction in the Adult ICU: A Systematic Review Including Psychometric Properties. *Crit Care Med*. 2015;43(8):1731-44.
3. Heyland DK, Tranmer JE. Measuring family satisfaction with care in the intensive care unit: the development of a questionnaire and preliminary results. *J Crit Care*. 2001;16(4):142-9.
4. Rothen HU, Stricker KH, Heyland DK. Family satisfaction with critical care: measurements and messages. *Curr Opin Crit Care*. 2010;16(6):623-31.
5. Wall RJ, Engelberg RA, Downey L, et al. Refinement, scoring, and validation of the Family Satisfaction in the Intensive Care Unit (FS-ICU) survey. *Crit Care Med*. 2007;35(1):271-9.
6. Wall RJ, Curtis JR, Cooke CR, et al. Family satisfaction in the ICU: differences between families of survivors and nonsurvivors. *Chest*. 2007;132(5):1425-33.
7. Stricker KH, Kimberger O, Schmidlin K, et al. Family satisfaction in the intensive care unit: what makes the difference? *Intensive Care Med*. 2009;35(12):2051-9.
8. Wright SE, Walmsley E, Harvey SE, et al. Family-Reported Experiences Evaluation (FREE) study: a mixed-methods study to evaluate families' satisfaction with adult critical care services in the NHS. *Health Serv Deliv Res*. 2015;3(45).
9. DA H, P F-V, SE W, et al. Psychometric assessment of the Family Satisfaction in the Intensive Care Unit questionnaire in the United Kingdom. *J Crit Care*. 2017;38:346-50.
10. Snijders TAB, Bosker RJ. *Multilevel Analysis: An Introduction to Basic and Advanced Multilevel Modeling*. Thousand Oaks, CA: SAGE Publications; 1999.
11. Spiegelhalter DJ. Funnel plots for comparing institutional performance. *Stat Med*. 2005;24(8):1185-202.
12. Carpenter JR, Goldstein H, Kenward MG. REALCOM-IMPUTE software for multilevel multiple imputation with mixed response types. *Journal of Statistical Software*. 2011;45:5.
13. von Elm E, Altman DG, Egger M, et al. Strengthening the Reporting of Observational Studies in Epidemiology (STROBE) statement: guidelines for reporting observational studies. *BMJ*. 2007;335(7624):806-8.
14. Dodek PM, Wong H, Heyland DK, et al. The relationship between organizational culture and family satisfaction in critical care. *Crit Care Med*. 2012;40(5):1506-12.
15. Khalaila R. Patients' family satisfaction with needs met at the medical intensive care unit. *Journal of Advanced Nursing*. 2013(69):1172-82.
16. Schwarzkopf D, Behrend S, Skupin H, et al. Family satisfaction in the intensive care unit: a quantitative and qualitative analysis. *Intensive Care Med*. 2013;39(6):1071-9.
17. Tastan S, Iyigun E, Ayhan H, et al. Validity and reliability of Turkish version of family satisfaction in the intensive care unit. *Int J Nurs Pract*. 2014;20(3):320-6.
18. Gelman A HJ. *Data Analysis Using Regression and Multilevel/Hierarchical Models*. Cambridge: Cambridge University Press; 2007.
19. Maas CJM, Hox JJ. The influence of violations of assumptions on multilevel parameter estimates and their standard errors. *Computational Statistics & Data Analysis*. 2004;46(3):427-40.

1  
2  
3 **Figure legends**  
4

5 Figure 1 Distribution of overall family satisfaction score  
6

7 Figure 2 Variation across ICUs in the mean overall family satisfaction score (A) before and (B) after  
8 adjustment for patient and family member characteristics  
9  
10  
11  
12  
13  
14  
15  
16  
17  
18  
19  
20  
21  
22  
23  
24  
25  
26  
27  
28  
29  
30  
31  
32  
33  
34  
35  
36  
37  
38  
39  
40  
41  
42  
43  
44  
45  
46  
47  
48  
49  
50  
51  
52  
53  
54  
55  
56  
57  
58  
59  
60

For peer review only

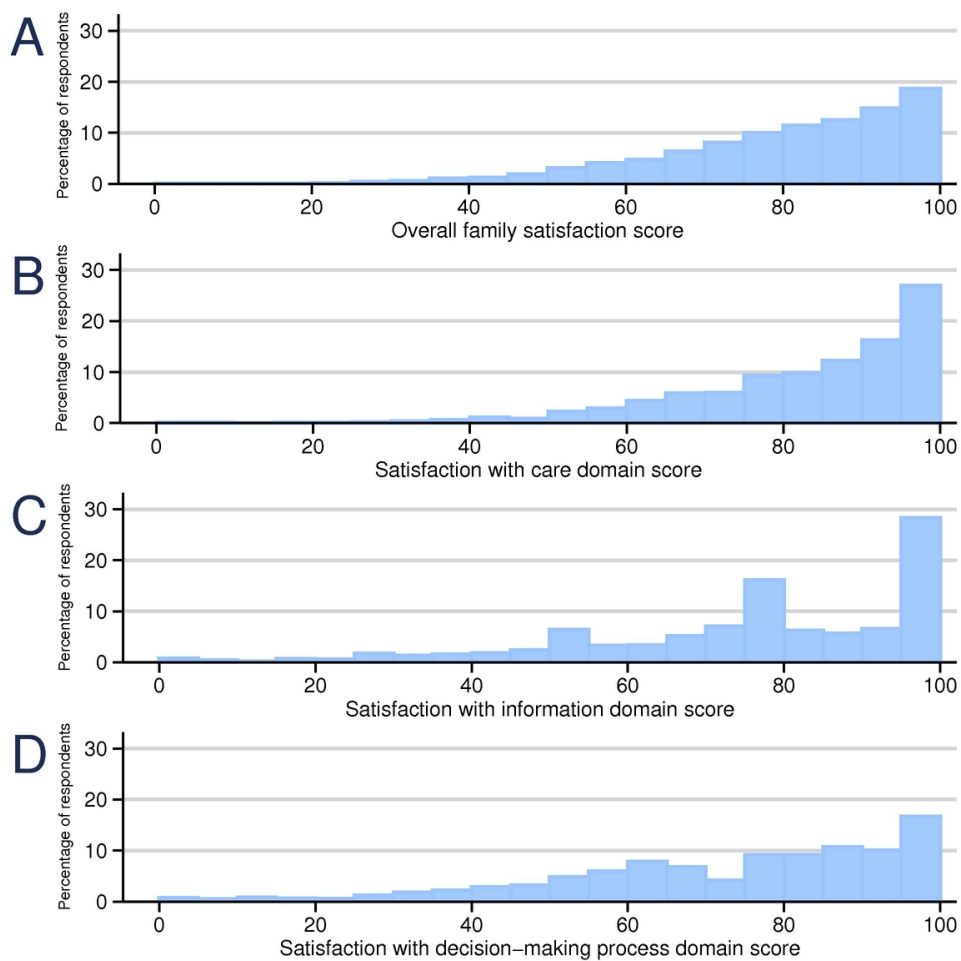

101x101mm (300 x 300 DPI)

1  
2  
3  
4  
5  
6  
7  
8  
9  
10  
11  
12  
13  
14  
15  
16  
17  
18  
19  
20  
21  
22  
23  
24  
25  
26  
27  
28  
29  
30  
31  
32  
33  
34  
35  
36  
37  
38  
39  
40  
41  
42  
43  
44  
45  
46  
47  
48  
49  
50  
51  
52  
53  
54  
55  
56  
57  
58  
59  
60

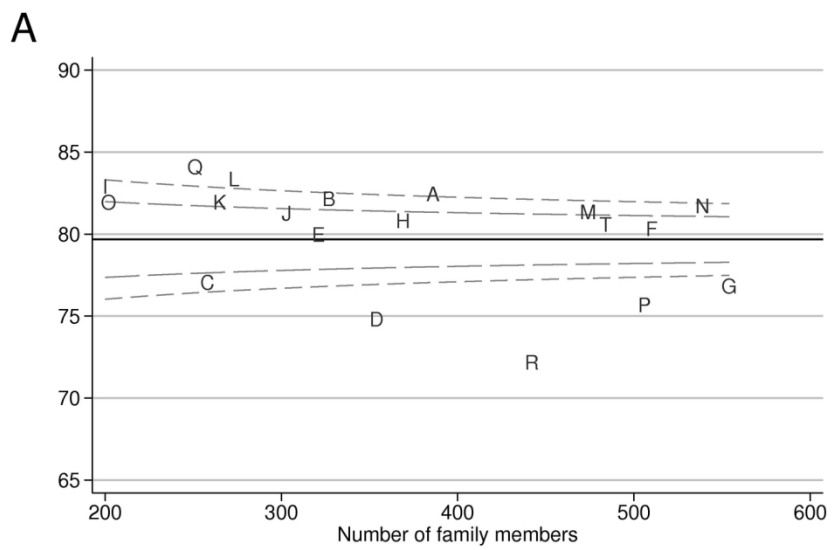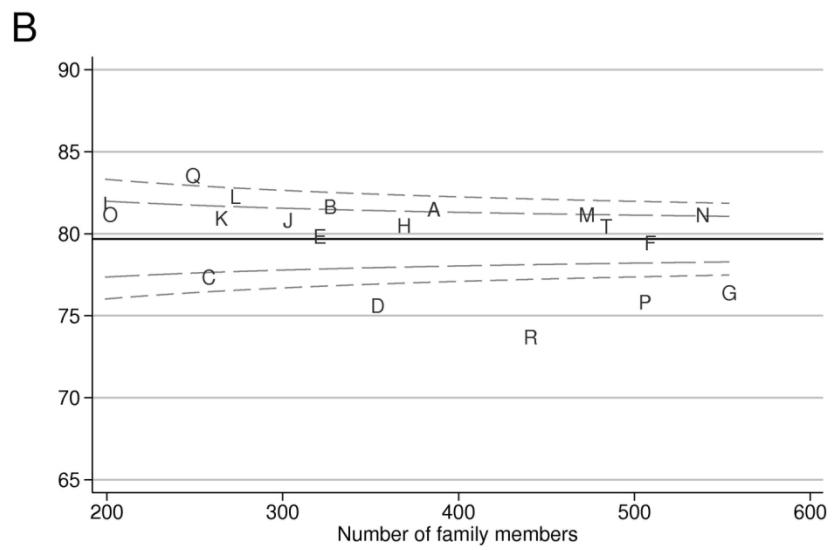

127x177mm (300 x 300 DPI)

**Supplementary material**

Family satisfaction with critical care in the United Kingdom: a multi-centre cohort study

For peer review only

**Table S1** Characteristics and outcomes for all admission to ICUs participating in the FREE study and ICNARC Case Mix Programme

|                                                                     | <b>CMP</b>                              | <b>FREE study</b>                      |
|---------------------------------------------------------------------|-----------------------------------------|----------------------------------------|
| Total number of ICUs [N]                                            | [209] <sup>a</sup>                      | [19] <sup>a</sup>                      |
| Total number of admissions [N]                                      | [149,779]                               | [18,270]                               |
| Age <i>mean</i> (SD)                                                | 61.5 (18.0)                             | 61.5 (18.0)                            |
| Sex <i>male</i> (%)                                                 | 82,444 (55.0)                           | 10,316 (56.5)                          |
| Ethnicity <i>n</i> (%)                                              |                                         |                                        |
| White                                                               | 135,767 (90.6)                          | 16,439 (90.0)                          |
| Asian                                                               | 4,815 (3.2)                             | 439 (2.4)                              |
| Black                                                               | 3,250 (2.2)                             | 327 (1.8)                              |
| Other                                                               | 2,434 (1.6)                             | 445 (2.4)                              |
| Not stated                                                          | 3,513 (2.3)                             | 620 (3.4)                              |
| Distance (km) from patient home to hospital <i>median</i> (IQR) [N] | 25.0 (54.2) 8.7 (3.9 19.3)<br>[128,169] | 31.7 (64.5) 9.2 (4.2 20.8)<br>[18,090] |
| APACHE II severe co-morbidities <i>n</i> (%)                        |                                         |                                        |
| 0                                                                   | 123,437 (82.4)                          | 14,742 (80.7)                          |
| 1                                                                   | 20,906 (14.0)                           | 2,648 (14.5)                           |
| 2                                                                   | 5,053 (3.4)                             | 793 (4.3)                              |
| 3 or more                                                           | 383 (0.3)                               | 87 (0.5)                               |
| Admission type <i>n</i> (%) [N]                                     | [149,765]                               | [18,270]                               |
| Medical                                                             | 87,940 (58.7)                           | 10,039 (54.9)                          |
| Elective surgery                                                    | 34,284 (22.9)                           | 4,761 (26.1)                           |
| Emergency surgery                                                   | 27,541 (18.4)                           | 3,470 (19.0)                           |
| Surgical status of surgical admissions <i>n</i> (%) [N]             | [61,825]                                | [8,231]                                |
| Planned surgery                                                     | 28,267 (45.7)                           | 3,985 (48.4)                           |
| Unplanned surgery                                                   | 33,558 (54.3)                           | 4,246 (51.6)                           |
| ICNARC Physiology Score <i>mean</i> (SD)                            | 16.9 (9.3)                              | 16.5 (9.2)                             |
| ICNARC predicted risk of death <i>median</i> (IQR) [N]              | 0.10 (0.03 0.33)<br>[142,654]           | 0.09 (0.03 0.30) [17,261]              |
| APACHE II Acute Physiology Score <i>mean</i> (SD)                   | 11.4 (6.1)                              | 11.3 (5.9)                             |
| APACHE II Score <i>mean</i> (SD)                                    | 15.7 (7.0)                              | 15.6 (6.9)                             |
| APACHE II predicted risk of death <i>median</i> (IQR) [N]           | 0.12 (0.04 0.29)<br>[132,197]           | 0.11 (0.04 0.28) [16,193]              |
| Mechanical ventilation during first 24 hrs <i>n</i> (%) [N]         | 58,687 (39.4) [148,975]                 | 7,008 (38.5) [18,187]                  |



|                                           |                         |                       |
|-------------------------------------------|-------------------------|-----------------------|
| ICU mortality <i>n</i> (%) [N]            | 21,505 (14.4) [149,779] | 2,560 (14.0) [18,270] |
| Acute hospital mortality <i>n</i> (%) [N] | 29,945 (21.0) [142,670] | 3,550 (20.6) [17,266] |

<sup>a</sup> excludes one ICU for which no CMP data were available

For peer review only

**Figure S1** Overview of patients, family members and questionnaires (distributed/returned)**Key**

Recruitment in ICU →

Postal survey - - - - -

**Table S2** Characteristics of all recruited family members and by response to questionnaire

|                                                                            | <b>All recruited family members</b> | <b>Those returning questionnaires</b> | <b>Did not respond</b>    |
|----------------------------------------------------------------------------|-------------------------------------|---------------------------------------|---------------------------|
| Total number of family members, N                                          | 12 346                              | 7173                                  | 4611                      |
| Age group, <i>n</i> (%) [N]                                                | [12 068]                            | [7019]                                | [4500]                    |
| <30                                                                        | 1429 (11.8)                         | 530 (7.6)                             | 861 (19.1)                |
| 30-39                                                                      | 1590 (13.2)                         | 721 (10.3)                            | 827 (18.4)                |
| 40-49                                                                      | 2760 (22.9)                         | 1465 (20.9)                           | 1208 (26.9)               |
| 50-59                                                                      | 2646 (21.9)                         | 1654 (23.6)                           | 886 (19.7)                |
| 60-69                                                                      | 2131 (17.7)                         | 1580 (22.5)                           | 440 (9.8)                 |
| 70-79                                                                      | 1211 (10.0)                         | 862 (12.3)                            | 220 (4.8)                 |
| 80+                                                                        | 301 (2.5)                           | 207 (2.9)                             | 58 (1.3)                  |
| Sex, <i>n</i> (%) [N]                                                      | [12 145]                            | [7062]                                | [4529]                    |
| Female                                                                     | 7687 (63.3)                         | 4689 (66.4)                           | 2663 (58.8)               |
| Male                                                                       | 4458 (36.7)                         | 2373 (33.6)                           | 1866 (41.2)               |
| Ethnicity, <i>n</i> (%) [N]                                                | [12 090]                            | [7033]                                | [4505]                    |
| White                                                                      | 11 379 (94.1)                       | 6747 (95.9)                           | 4111 (91.3)               |
| Asian                                                                      | 355 (2.9)                           | 142 (2.0)                             | 196 (4.4)                 |
| Black                                                                      | 161 (1.3)                           | 55 (0.8)                              | 101 (2.2)                 |
| Other                                                                      | 195 (1.6)                           | 89 (1.3)                              | 97 (2.1)                  |
| Deprivation, <i>n</i> (%) [N]                                              | [11 740]                            | [6832]                                | [4370]                    |
| 1 [least deprived]                                                         | 2113 (18.0)                         | 1376 (20.1)                           | 634 (14.5)                |
| 2                                                                          | 2406 (20.5)                         | 1502 (22.0)                           | 803 (18.4)                |
| 3                                                                          | 2415 (20.6)                         | 1443 (21.1)                           | 851 (19.5)                |
| 4                                                                          | 2545 (21.7)                         | 1380 (20.2)                           | 1045 (23.9)               |
| 5 [most deprived]                                                          | 2261 (19.3)                         | 1131 (16.6)                           | 1037 (23.7)               |
| Distance (km) from family member home to hospital, <i>median</i> (IQR) [N] | 11.6 (5.1-30.7)<br>[11 803]         | 12.3 (5.3-33.2)<br>[6867]             | 10.7 (4.6-29.4)<br>[4394] |
| Relationship, <i>n</i> (%) [N] "I am the patient's..."                     | [12 343]                            | [7173]                                | [4611]                    |
| Partner                                                                    | 3105 (25.2)                         | 2151 (30.0)                           | 786 (17.0)                |
| Child                                                                      | 4186 (33.9)                         | 2292 (32.0)                           | 1780 (38.6)               |
| Parent                                                                     | 1054 (8.5)                          | 665 (9.3)                             | 338 (7.3)                 |
| Sibling                                                                    | 1271 (10.3)                         | 717 (10.0)                            | 480 (10.4)                |
| Other relative                                                             | 1973 (16.0)                         | 987 (13.8)                            | 898 (19.5)                |
| Other non-relative                                                         | 754 (6.1)                           | 361 (5.0)                             | 329 (7.1)                 |
| Next-of-kin, <i>n</i> (%) [N]                                              | [11 702]                            | [6770]                                | [4389]                    |
| No                                                                         | 7086 (60.6)                         | 3747 (55.3)                           | 3009 (68.6)               |
| Yes                                                                        | 4616 (39.4)                         | 3023 (44.7)                           | 1380 (31.4)               |
| Lives with patient, <i>n</i> (%) [N]                                       | [12 343]                            | [7172]                                | [4609]                    |
| No                                                                         | 8255 (66.9)                         | 4543 (63.3)                           | 3357 (72.8)               |
| Yes                                                                        | 4088 (33.1)                         | 2629 (36.7)                           | 1252 (27.2)               |
| Education level, <i>n</i> (%) [N]                                          | [10 293]                            | [5971]                                | [3888]                    |
| NVQ 1 or 2                                                                 | 3147 (30.6)                         | 1731 (29.0)                           | 1284 (33.0)               |
| NVQ 3                                                                      | 2086 (20.3)                         | 1149 (19.2)                           | 870 (22.4)                |

|                                  |               |              |             |
|----------------------------------|---------------|--------------|-------------|
| NVQ 4 or 5                       | 2936 (28.5)   | 1819 (30.5)  | 1032 (26.5) |
| Other                            | 2124 (20.6)   | 1272 (21.3)  | 702 (18.1)  |
| <hr/>                            |               |              |             |
| First language, <i>n</i> (%) [N] | [12 346]      | [7 173]      | [4611]      |
| Not English                      | 335 (2.7)     | 140 (2.0)    | 182 (3.9)   |
| English                          | 12 011 (97.3) | 7 033 (98.0) | 4429 (96.1) |
| <hr/>                            |               |              |             |

For peer review only

**Table S3** Univariable analyses of factors associated with overall family satisfaction score by ICU outcome – family member characteristics

| Variables                                      | Family members of ICU survivors [N=6,147 <sup>a</sup> ] |                |         | Family members of ICU non-survivors [N=870] |                 |         |
|------------------------------------------------|---------------------------------------------------------|----------------|---------|---------------------------------------------|-----------------|---------|
|                                                | Coef.                                                   | 95% CI         | p-value | Coef.                                       | 95% CI          | p-value |
| Age, years (vs < 30)                           |                                                         |                | 0.031   |                                             |                 | 0.033   |
| 30-39                                          | 1.56                                                    | (-0.22, 3.33)  |         | 2.68                                        | (-1.80, 7.17)   |         |
| 40-49                                          | 0.42                                                    | (-0.10, 0.94)  |         | 1.61                                        | (0.21, 3.01)    |         |
| 50-59                                          | 2.12                                                    | (0.61, 3.64)   |         | 5.49                                        | (1.49, 9.50)    |         |
| 60-69                                          | 1.96                                                    | (0.39, 3.52)   |         | 6.01                                        | (1.78, 10.25)   |         |
| 70-79                                          | 1.98                                                    | (0.28, 3.68)   |         | 7.39                                        | (2.58, 12.19)   |         |
| 80+                                            | -0.55                                                   | (-3.05, 1.95)  |         | 2.62                                        | (-3.48, 8.73)   |         |
| Female (vs male)                               | 0.40                                                    | (-0.34, 1.14)  | 0.29    | 0.44                                        | (-1.59, 2.47)   | 0.67    |
| White ethnicity (vs non-white)                 | 3.60                                                    | (1.46, 5.75)   | 0.001   | 8.78                                        | (1.85, 15.70)   | 0.013   |
| Relationship (vs partner)                      |                                                         |                | <0.001  |                                             |                 | 0.28    |
| Parent                                         | 0.00                                                    | (-1.39, 1.39)  |         | 0.08                                        | (-5.73, 5.90)   |         |
| Child                                          | -0.94                                                   | (-1.83, -0.05) |         | -1.274                                      | (-3.69, 1.14)   |         |
| Sibling                                        | -2.16                                                   | (-3.50, -0.82) |         | 0.909                                       | (-3.02, 4.84)   |         |
| Other-relative                                 | -1.63                                                   | (-2.81, -0.44) |         | -0.619                                      | (-3.60, 2.36)   |         |
| Other-non relative                             | -3.42                                                   | (-5.22, -1.62) |         | -6.134                                      | (-11.69, -0.58) |         |
| Next of kin                                    | 1.74                                                    | (1.05, 2.44)   | <0.001  | 2.69                                        | (0.78, 4.59)    | 0.006   |
| Lives with patient                             | 1.95                                                    | (1.20, 2.69)   | <0.001  | 1.15                                        | (-0.99, 3.29)   | 0.29    |
| Education (vs NVQ 1 or 2)                      |                                                         |                | <0.001  |                                             |                 | 0.16    |
| NVQ 3                                          | -0.60                                                   | (-1.77, 0.57)  |         | 1.14                                        | (-2.09, 4.37)   |         |
| NVQ 4 or 5                                     | -2.43                                                   | (-3.49, -1.37) |         | -2.07                                       | (-4.92, 0.77)   |         |
| Other                                          | -0.18                                                   | (-1.35, 0.98)  |         | -1.75                                       | (-4.73, 1.24)   |         |
| Quintile of deprivation (vs 1, least deprived) |                                                         |                | 0.63    |                                             |                 | 0.77    |
| 2                                              | 0.49                                                    | (-0.74, 1.72)  |         | 0.64                                        | (-2.73, 4.01)   |         |
| 3                                              | 0.96                                                    | (-0.29, 2.20)  |         | 0.84                                        | (-2.59, 4.26)   |         |
| 4                                              | 0.32                                                    | (-0.97, 1.60)  |         | -1.07                                       | (-4.59, 2.44)   |         |
| 5 (most deprived)                              | 0.67                                                    | (-0.70, 2.05)  |         | 0.79                                        | (-3.10, 4.69)   |         |
| Distance from home to hospital (per 10 km)     | -0.05                                                   | (-0.11, 0.01)  | 0.12    | 0.05                                        | (-0.09, 0.18)   | 0.49    |
| Previous experience of ICU as a family member  | 0.25                                                    | (-0.63, 1.14)  | 0.58    | -0.68                                       | (-3.22, 1.87)   | 0.60    |
| Frequent visitor                               | 2.52                                                    | (1.63, 3.41)   | <0.001  | 2.91                                        | (0.36, 5.47)    | 0.030   |

Coef., coefficient.

<sup>a</sup> Two family members returned questionnaires but did not complete any of the 24 FS-ICU items – responses were not imputed for these family members.

**Table S4** Univariable analyses of factors associated with overall family satisfaction score by ICU outcome – patient characteristics

| Variables                                         | Family members of ICU survivors [N=6,147 <sup>a</sup> ] |                |         | Family members of ICU non-survivors [N=870] |                 |         |
|---------------------------------------------------|---------------------------------------------------------|----------------|---------|---------------------------------------------|-----------------|---------|
|                                                   | Coef.                                                   | 95% CI         | p-value | Coef.                                       | 95% CI          | p-value |
| Age (per 10 years)                                | -0.09                                                   | (-0.36, 0.17)  | 0.49    | 1.12                                        | (0.11, 2.14)    | 0.030   |
| Female (vs male)                                  | 0.67                                                    | (-0.25, 1.59)  | 0.16    | 2.04                                        | (-0.66, 4.74)   | 0.14    |
| White ethnicity (vs non-white)                    | 2.39                                                    | (0.11, 4.68)   | 0.040   | 9.25                                        | (2.38, 16.12)   | 0.008   |
| Quintile of deprivation (vs 1, least deprived)    |                                                         |                | 0.76    |                                             |                 | 0.95    |
| 2                                                 | 0.86                                                    | (-0.66, 2.38)  |         | -1.28                                       | (-5.85, 3.29)   |         |
| 3                                                 | 0.62                                                    | (-0.90, 2.13)  |         | -0.68                                       | (-5.12, 3.75)   |         |
| 4                                                 | 0.77                                                    | (-0.75, 2.28)  |         | -1.62                                       | (-6.03, 2.78)   |         |
| 5 (most deprived)                                 | 1.00                                                    | (-0.57, 2.57)  |         | -1.49                                       | (-6.04, 3.06)   |         |
| Distance from home to hospital (per 10 km)        | 0.12                                                    | (0.00, 0.24)   | 0.047   | 0.18                                        | (-0.05, 0.41)   | 0.12    |
| Severe comorbidities                              |                                                         |                |         |                                             |                 |         |
| Liver                                             | 3.18                                                    | (-0.01, 6.38)  | 0.050   | 1.25                                        | (-4.67, 7.19)   | 0.68    |
| Renal                                             | -0.45                                                   | (-3.57, 2.66)  | 0.77    | -8.87                                       | (-18.35, 0.60)  | 0.067   |
| Respiratory                                       | 0.01                                                    | (-2.84, 2.85)  | 1.00    | -1.02                                       | (-7.23, 5.19)   | 0.75    |
| Cardiovascular                                    | -0.14                                                   | (-3.23, 2.94)  | 0.93    | 1.40                                        | (-6.46, 9.26)   | 0.73    |
| Metastatic cancer                                 | -2.81                                                   | (-5.78, 0.15)  | 0.063   | 3.26                                        | (-6.38, 12.90)  | 0.51    |
| Haematological malignancy                         | 2.25                                                    | (-1.09, 5.61)  | 0.19    | -7.88                                       | (-14.62, -1.13) | 0.022   |
| Immunocompromise                                  | -0.91                                                   | (-2.74, 0.90)  | 0.33    | -3.90                                       | (-8.55, 0.74)   | 0.10    |
| Dependency (vs none)                              |                                                         |                | 0.30    |                                             |                 | 0.85    |
| Minor or major                                    | -0.14                                                   | (-1.36, 1.08)  |         | 0.63                                        | (-2.34, 3.60)   |         |
| Total                                             | -3.63                                                   | (-8.21, 0.94)  |         | 2.73                                        | (-10.21, 15.67) |         |
| Surgical status (vs non-surgical)                 |                                                         |                | 0.005   |                                             |                 | 0.78    |
| Planned elective/scheduled                        | -2.17                                                   | (-3.51, -0.83) |         | -2.83                                       | (-10.75, 5.10)  |         |
| Unplanned                                         | -0.17                                                   | (-1.29, 0.96)  |         | -0.06                                       | (-3.89, 3.76)   |         |
| ICNARC Physiology Score (per point)               | 0.19                                                    | (0.13, 0.25)   | <0.001  | 0.19                                        | (0.02, 0.35)    | 0.026   |
| ICU length of stay (per day)                      | 0.02                                                    | (-0.03, 0.06)  | 0.44    | -0.34                                       | (-0.48, -0.20)  | <0.001  |
| Advanced respiratory support                      | 3.62                                                    | (2.63, 4.61)   | <0.001  | 1.96                                        | (-1.84, 5.76)   | 0.31    |
| Advanced cardiovascular support                   | 2.06                                                    | (0.89, 3.22)   | 0.001   | 0.83                                        | (-2.06, 3.72)   | 0.58    |
| Renal support                                     | 1.52                                                    | (0.11, 2.93)   | 0.034   | 0.04                                        | (-2.83, 2.91)   | 0.98    |
| Neurological support                              | 1.96                                                    | (0.39, 3.54)   | 0.014   | 2.95                                        | (-0.42, 6.32)   | 0.086   |
| Duration of adv. respiratory support (per day)    | 0.11                                                    | (0.05, 0.16)   | <0.001  | -0.16                                       | (-0.32, 0.00)   | 0.051   |
| Duration of adv. cardiovascular support (per day) | 0.40                                                    | (0.15, 0.65)   | 0.002   | 0.11                                        | (-0.33, 0.56)   | 0.62    |
| Duration of renal support (per day)               | 0.16                                                    | (0.00, 0.32)   | 0.048   | -0.15                                       | (-0.43, 0.13)   | 0.28    |
| Duration of neurological support (per day)        | 0.10                                                    | (-0.09, 0.29)  | 0.31    | 0.05                                        | (-0.43, 0.53)   | 0.84    |
| Death before acute hospital discharge             | -0.49                                                   | (-1.52, 0.55)  | 0.36    | N/A                                         |                 |         |

Coef., coefficient.

1  
2  
3     <sup>a</sup> Two family members returned questionnaires but did not complete any of the 24 FS-ICU items –  
4     responses were not imputed for these family members.  
5  
6  
7  
8  
9  
10  
11  
12  
13  
14  
15  
16  
17  
18  
19  
20  
21  
22  
23  
24  
25  
26  
27  
28  
29  
30  
31  
32  
33  
34  
35  
36  
37  
38  
39  
40  
41  
42  
43  
44  
45  
46  
47  
48  
49  
50  
51  
52  
53  
54  
55  
56  
57  
58  
59  
60

For peer review only

**Table S5** Univariable analysis of factors associated with overall family satisfaction score by ICU outcome – ICU/hospital characteristics and contextual factors

| Variables                                              | Family members of ICU survivors [N=6,147 <sup>a</sup> ] |               |         | Family members of ICU non-survivors [N=870] |                |         |
|--------------------------------------------------------|---------------------------------------------------------|---------------|---------|---------------------------------------------|----------------|---------|
|                                                        | Coef.                                                   | 95% CI        | p-value | Coef.                                       | 95% CI         | p-value |
| Hospital type (vs non-university)                      |                                                         |               | 0.51    |                                             |                | 0.62    |
| University                                             | 0.06                                                    | (-3.63, 3.75) |         | -0.32                                       | (-4.72, 4.07)  |         |
| University affiliated                                  | 1.93                                                    | (-1.56, 5.42) |         | 1.68                                        | (-2.29, 5.65)  |         |
| Number of ICU beds (per bed)                           | -0.05                                                   | (-0.23, 0.14) | 0.63    | 0.02                                        | (-0.22, 0.26)  | 0.85    |
| Month of ICU admission (vs January)                    |                                                         |               | 0.95    |                                             |                | 0.85    |
| February                                               | -0.61                                                   | (-2.87, 1.65) |         | -0.03                                       | (-6.90, 6.83)  |         |
| March                                                  | 0.09                                                    | (-2.12, 2.30) |         | -0.06                                       | (-6.73, 6.60)  |         |
| April                                                  | 0.54                                                    | (-1.71, 2.79) |         | 0.07                                        | (-6.93, 7.07)  |         |
| May                                                    | -0.06                                                   | (-2.31, 2.18) |         | 0.73                                        | (-5.62, 7.08)  |         |
| June                                                   | -0.66                                                   | (-2.65, 1.34) |         | 0.84                                        | (-4.95, 6.64)  |         |
| July                                                   | 0.85                                                    | (-1.41, 3.11) |         | 3.91                                        | (-2.71, 10.52) |         |
| August                                                 | 0.65                                                    | (-1.64, 2.93) |         | -0.70                                       | (-6.87, 5.46)  |         |
| September                                              | 0.09                                                    | (-2.14, 2.31) |         | 1.74                                        | (-4.76, 8.25)  |         |
| October                                                | 0.44                                                    | (-1.76, 2.63) |         | 1.15                                        | (-5.69, 7.98)  |         |
| November                                               | 0.60                                                    | (-1.65, 2.85) |         | 2.21                                        | (-4.10, 8.53)  |         |
| December                                               | 0.69                                                    | (-1.57, 2.96) |         | 5.16                                        | (-1.13, 11.46) |         |
| Questionnaire received while patient still in hospital | 0.087                                                   | (-1.50, 1.67) | 0.91    | N/A                                         |                |         |

Coef., coefficient.

<sup>a</sup> Two family members returned questionnaires but did not complete any of the 24 FS-ICU items – responses were not imputed for these family members.



**Table S6** Sensitivity analyses –candidate determinants for the multivariable multilevel models for the family satisfaction in the intensive care unit

| Candidate determinants                                         | Justification inclusion/exclusion                                                                                                                                                                                | Approach to modelling                                                                                                  |
|----------------------------------------------------------------|------------------------------------------------------------------------------------------------------------------------------------------------------------------------------------------------------------------|------------------------------------------------------------------------------------------------------------------------|
| <b>Family member level</b>                                     |                                                                                                                                                                                                                  |                                                                                                                        |
| Education level                                                | It was not considered in the multivariable models due to higher than expected proportions of both “Not stated” (17%) and “Other” (21%) responses, suggesting a lack of comprehension of the categorisation used. |                                                                                                                        |
| Distance from home to hospital                                 | No significant after adjusting for other variables in the model. It was dropped.                                                                                                                                 |                                                                                                                        |
| Family member age, years                                       | Controlling effect                                                                                                                                                                                               | Categorical (<30;30-39;40-49;50-59;60-69;70-79;80+)                                                                    |
| Family member sex                                              | Controlling effect                                                                                                                                                                                               | Categorical (male; female)                                                                                             |
| Family member ethnicity                                        | Statistically significant in univariable                                                                                                                                                                         | Categorical (white; non-white)                                                                                         |
| Next-of-kin/lives with patient                                 | There was a strong multicollinearity between relationship to the patient and the other key variables of next-of-kin and lives with patient.                                                                      | Categorical (lives with patient; Next-of-kin, does not live with patient; Not next-of-kin, does not live with patient) |
| Frequent visitor                                               | Statistically significant in univariable                                                                                                                                                                         | Binary (yes; no)                                                                                                       |
| <b>Patient level</b>                                           |                                                                                                                                                                                                                  |                                                                                                                        |
| Patient ethnicity                                              | It was not carried forward to the multivariable models due to collinearity with family member ethnicity.                                                                                                         |                                                                                                                        |
| Patient age                                                    | Controlling effect                                                                                                                                                                                               | Continuous(linear)                                                                                                     |
| Patient sex                                                    | Controlling effect                                                                                                                                                                                               | Categorical (male; female)                                                                                             |
| Dependency                                                     | Controlling effect                                                                                                                                                                                               | Categorical (none; minor or major; total)                                                                              |
| Surgical status (vs non-surgical)                              | Controlling effect                                                                                                                                                                                               | Categorical (non-surgical; planned elective/scheduled; unplanned)                                                      |
| ICNARC Physiology Score                                        | Statistically significant in univariable                                                                                                                                                                         | Continuous(linear)                                                                                                     |
| ICU length of stay (days)                                      |                                                                                                                                                                                                                  | Continuous(linear)                                                                                                     |
| Organ support received in the ICU and duration (calendar days) | Once included in the multivariable model for                                                                                                                                                                     |                                                                                                                        |

|                                                    |                                                                                                                                                      |                                                                 |
|----------------------------------------------------|------------------------------------------------------------------------------------------------------------------------------------------------------|-----------------------------------------------------------------|
| of organ support among those receiving the support | survivors, only advanced respiratory support remained significant.                                                                                   |                                                                 |
| Advanced respiratory support                       | It was found to be preferable to alternative variable of the duration of advanced respiratory support, which was correlated with ICU length of stay. | Binary (yes; no)                                                |
| haematological malignancy                          | No significant after adjusting for other variables in the model. It was dropped.                                                                     |                                                                 |
| <b>ICU/hospital level</b>                          |                                                                                                                                                      |                                                                 |
| Hospital type                                      | Controlling effect                                                                                                                                   | Categorical (non-university; university; university affiliated) |
| Number of ICU beds                                 | Controlling effect                                                                                                                                   | Continuous(linear)                                              |

**Table S7** Multivariable multilevel models for the satisfaction with care domain score

| Variables                                              | Family members of ICU survivors [N=6,143 <sup>a</sup> ] |        |         | Family members of ICU non-survivors [N=869 <sup>a</sup> ] |                             |         |
|--------------------------------------------------------|---------------------------------------------------------|--------|---------|-----------------------------------------------------------|-----------------------------|---------|
|                                                        | Coef.                                                   | 95% CI | p-value | Coef.                                                     | 95% CI                      | p-value |
| Fixed effects – family member level                    |                                                         |        |         |                                                           |                             |         |
| Constant                                               | 71.45 (66.67, 76.22)                                    |        |         | 55.29 (41.76, 68.82)                                      |                             |         |
| Family member age, years (vs <30)                      |                                                         |        |         | 0.001                                                     | 0.16                        |         |
| 30-39                                                  | 2.60 (0.81, 4.38)                                       |        |         | 2.50 (-1.97, 6.97)                                        |                             |         |
| 40-49                                                  | 2.73 (1.16, 4.31)                                       |        |         | 4.31 (0.09, 8.54)                                         |                             |         |
| 50-59                                                  | 2.91 (1.36, 4.44)                                       |        |         | 4.99 (0.93, 9.04)                                         |                             |         |
| 60-69                                                  | 2.67 (1.08, 4.26)                                       |        |         | 4.89 (0.54, 9.23)                                         |                             |         |
| 70-79                                                  | 2.66 (0.90, 4.41)                                       |        |         | 5.91 (0.88, 10.94)                                        |                             |         |
| 80+                                                    | -0.17 (-2.76, 2.41)                                     |        |         | 1.85 (-4.51, 8.21)                                        |                             |         |
| Family member sex – female (vs male)                   | 0.42 (-0.35, 1.20)                                      |        |         | 0.29                                                      | 0.22 (-1.81, 2.25) 0.83     |         |
| Family member ethnicity – white (vs non-white)         | 3.87 (1.77, 5.97)                                       |        |         | <0.001                                                    | 6.99 (0.19, 13.81) 0.044    |         |
| Next-of-kin/lives with patient (vs lives with patient) |                                                         |        |         | <0.001                                                    | 0.15                        |         |
| Next-of-kin, does not live with patient                | -1.14 (-2.26, -0.02)                                    |        |         | 0.95 (-2.39, 4.29)                                        |                             |         |
| Not next-of-kin, does not live with patient            | -2.44 (-3.32, -1.55)                                    |        |         | -1.58 (-4.11, 0.94)                                       |                             |         |
| Frequent visitor                                       | 2.49 (1.52, 3.46)                                       |        |         | <0.001                                                    | 1.49 (-1.27, 4.25) 0.29     |         |
| Fixed effects – patient level                          |                                                         |        |         |                                                           |                             |         |
| Patient age (per 10 years)                             | 0.03 (-0.25, 0.31)                                      |        |         | 0.83                                                      | 1.21 (0.16, 2.26) 0.024     |         |
| Patient sex – female (vs male)                         | 0.06 (-0.85, 0.98)                                      |        |         | 0.87                                                      | 1.85 (-0.79, 4.5) 0.17      |         |
| Dependency (vs none)                                   |                                                         |        |         | 0.006                                                     | 0.68                        |         |
| Minor or major                                         | -0.74 (-1.96, 0.46)                                     |        |         | -0.94 (-3.98, 2.09)                                       |                             |         |
| Total                                                  | -6.77 (-11.18, -2.36)                                   |        |         | 3.62 (-8.71, 15.95)                                       |                             |         |
| Surgical status (vs non-surgical)                      |                                                         |        |         | 0.68                                                      | 0.47                        |         |
| Planned elective/scheduled                             | -0.62 (-2.04, 0.78)                                     |        |         | -4.85 (-12.71, 2.99)                                      |                             |         |
| Unplanned                                              | -0.15 (-1.27, 0.95)                                     |        |         | -0.57 (-4.29, 3.13)                                       |                             |         |
| ICNARC Physiology Score (per point)                    | 0.14 (0.07, 0.21)                                       |        |         | <0.001                                                    | 0.14 (-0.03, 0.30) 0.10     |         |
| ICU length of stay (per day)                           | -0.02 (-0.06, 0.02)                                     |        |         | 0.39                                                      | -0.30 (-0.45, -0.15) <0.001 |         |
| Advanced respiratory support                           | 2.74 (1.66, 3.82)                                       |        |         | <0.001                                                    |                             |         |
| Fixed effects – ICU/hospital level                     |                                                         |        |         |                                                           |                             |         |
| Hospital type (vs non-university)                      |                                                         |        |         | 0.51                                                      | 0.58                        |         |

|                                        |                     |                    |                    |      |
|----------------------------------------|---------------------|--------------------|--------------------|------|
| University                             | 0.94 (-3.58, 5.47)  | -1.48 (-7.8, 4.84) |                    |      |
| University affiliated                  | 1.92 (-1.34, 5.19)  | 1.79 (-2.75, 6.34) |                    |      |
| Number of ICU beds (per bed)           | -0.01 (-0.24, 0.23) | 0.96               | 0.24 (-0.12, 0.59) | 0.19 |
| Random effects – SD (SE)               |                     |                    |                    |      |
| Between ICUs                           | 2.98 (0.60)         | 3.25 (1.11)        |                    |      |
| Within ICUs between patients           | 9.76 (0.28)         | 10.47 (0.66)       |                    |      |
| Within patients between family members | 11.96 (0.19)        | 11.92 (0.42)       |                    |      |

Coef, coefficient; SE, standard error.

<sup>a</sup> Five patients were missing age group on both the questionnaire and web portal – due to the very small amount of missing data in this key variable, these missing values were not imputed.

**Table S8** Multivariable multilevel models for the satisfaction with information domain score

| Variables                                              | Family members of ICU survivors [N=6,143 <sup>a</sup> ] |                |         | Family members of ICU non-survivors [N=869 <sup>a</sup> ] |                |         |
|--------------------------------------------------------|---------------------------------------------------------|----------------|---------|-----------------------------------------------------------|----------------|---------|
|                                                        | Coef.                                                   | 95% CI         | p-value | Coef.                                                     | 95% CI         | p-value |
| Fixed effects – family member level                    |                                                         |                |         |                                                           |                |         |
| Constant                                               | 66.07                                                   | (59.78, 72.21) |         | 55.86                                                     | (39.34, 72.38) |         |
| Family member age, years (vs <30)                      |                                                         |                | 0.63    |                                                           |                | 0.28    |
| 30-39                                                  | 0.28                                                    | (-2.22, 2.79)  |         | 1.23                                                      | (-4.92, 7.39)  |         |
| 40-49                                                  | 0.00                                                    | (-2.21, 2.21)  |         | 1.88                                                      | (-3.92, 7.68)  |         |
| 50-59                                                  | 0.55                                                    | (-1.62, 2.72)  |         | 2.88                                                      | (-2.70, 8.48)  |         |
| 60-69                                                  | -0.1                                                    | (-2.35, 2.14)  |         | 4.24                                                      | (-1.71, 10.2)  |         |
| 70-79                                                  | -0.41                                                   | (-2.89, 2.08)  |         | 6.43                                                      | (-0.45, 13.31) |         |
| 80+                                                    | -2.67                                                   | (-6.35, 1.01)  |         | -1.96                                                     | (-10.71, 6.79) |         |
| Family member sex – female (vs male)                   | 0.20                                                    | (-0.89, 1.30)  | 0.72    | 1.01                                                      | (-1.81, 3.82)  | 0.49    |
| Family member ethnicity – white (vs non-white)         | 4.73                                                    | (1.78, 7.68)   | 0.002   | 9.34                                                      | (0.47, 18.21)  | 0.039   |
| Next-of-kin/lives with patient (vs lives with patient) |                                                         |                | <0.001  |                                                           |                | 0.38    |
| Next-of-kin, does not live with patient                | -2.39                                                   | (-3.97, 0.81)  |         | 1.43                                                      | (-3.09, 5.95)  |         |
| Not next-of-kin, does not live with patient            | -2.57                                                   | (-3.83, 1.31)  |         | -1.21                                                     | (-4.69, 2.28)  |         |
| Frequent visitor                                       | 2.11                                                    | (0.74, 3.48)   | 0.002   | 0.44                                                      | (-3.33, 4.22)  | 0.82    |
| Fixed effects – patient level                          |                                                         |                |         |                                                           |                |         |
| Patient age (per 10 years)                             | -0.22                                                   | (-0.61, 0.18)  | 0.28    | 0.92                                                      | (-0.43, 2.27)  | 0.18    |
| Patient sex – female (vs male)                         | 0.32                                                    | (-0.98, 1.62)  | 0.63    | 1.93                                                      | (-1.48, 5.35)  | 0.27    |
| Dependency (vs none)                                   |                                                         |                | 0.61    |                                                           |                | 0.51    |
| Minor or major                                         | -0.49                                                   | (-2.2, 1.2)    |         | -0.28                                                     | (-4.11, 3.53)  |         |
| Total                                                  | -2.69                                                   | (-8.92, 3.52)  |         | 9.15                                                      | (-6.57, 24.87) |         |
| Surgical status (vs non-surgical)                      |                                                         |                | 0.88    |                                                           |                | 0.84    |
| Planned elective/scheduled                             | -0.32                                                   | (-2.32, 1.66)  |         | -0.88                                                     | (-10.97, 9.21) |         |
| Unplanned                                              | 0.23                                                    | (-1.33, 1.80)  |         | -1.4                                                      | (-6.16, 3.36)  |         |
| ICNARC Physiology Score (per point)                    | 0.23                                                    | (0.13, 0.33)   | <0.001  | 0.15                                                      | (-0.04, 0.36)  | 0.13    |
| ICU length of stay (per day)                           | -0.05                                                   | (-0.11, 0.01)  | 0.14    | -0.43                                                     | (-0.62, -0.24) | <0.001  |
| Advanced respiratory support                           | 3.34                                                    | (1.83, 4.85)   | <0.001  | --                                                        |                |         |
| Fixed effects – ICU/hospital level                     |                                                         |                |         |                                                           |                |         |
| Hospital type (vs non-university)                      |                                                         |                | 0.45    |                                                           |                | 0.58    |

|                                        |       |               |       |                         |
|----------------------------------------|-------|---------------|-------|-------------------------|
| University                             | 1.69  | (-3.71, 7.08) | 0.35  | (-6.42, 7.13)           |
| University affiliated                  | 2.48  | (-1.42, 6.40) | 2.53  | (-2.32, 7.39)           |
| Number of ICU beds (per bed)           | -0.03 | (-0.31, 0.24) | 0.81  | 0.21 (-0.17, 0.61) 0.27 |
| Random effects – SD (SE)               |       |               |       |                         |
| Between ICUs                           | 3.48  | (0.73)        | 2.81  | (1.37)                  |
| Within ICUs between patients           | 13.64 | (0.41)        | 12.38 | (0.97)                  |
| Within patients between family members | 16.88 | (0.27)        | 17.02 | (0.60)                  |

Coef, coefficient; SE, standard error.

<sup>a</sup> Five patients were missing age group on both the questionnaire and web portal – due to the very small amount of missing data in this key variable, these missing values were not imputed.

**Table S9** Multivariable multilevel models for the satisfaction with the decision-making process domain score

| Variables                                              | Family members of ICU survivors [N=6,143 <sup>a</sup> ] |                | Family members of ICU non-survivors [N=869 <sup>a</sup> ] |       |                 |         |
|--------------------------------------------------------|---------------------------------------------------------|----------------|-----------------------------------------------------------|-------|-----------------|---------|
|                                                        | Coef.                                                   | 95% CI         | p-value                                                   | Coef. | 95% CI          | p-value |
| Fixed effects – family member level                    |                                                         |                |                                                           |       |                 |         |
| Constant                                               | 61.65                                                   | (55.17, 68.14) |                                                           | 39.62 | (20.14, 59.09)  |         |
| Family member age, years (vs <30)                      |                                                         |                | 0.061                                                     |       |                 | 0.40    |
| 30-39                                                  | 1.66                                                    | (-1.63, 4.95)  |                                                           | 1.37  | (-5.35, 8.10)   |         |
| 40-49                                                  | 0.02                                                    | (-2.76, 2.82)  |                                                           | 2.73  | (-3.47, 8.95)   |         |
| 50-59                                                  | 0.52                                                    | (-2.21, 3.25)  |                                                           | 3.34  | (-2.61, 9.31)   |         |
| 60-69                                                  | -1.43                                                   | (-4.48, 1.61)  |                                                           | 3.35  | (-3.05, 9.77)   |         |
| 70-79                                                  | -1.09                                                   | (-4.32, 2.13)  |                                                           | 6.25  | (-1.36, 13.88)  |         |
| 80+                                                    | -3.87                                                   | (-8.43, 0.69)  |                                                           | -3.13 | (-12.88, 6.61)  |         |
| Family member sex – female (vs male)                   | -0.18                                                   | (-1.42, 1.04)  | 0.77                                                      | 1.66  | (-1.37, 4.71)   | 0.28    |
| Family member ethnicity – white (vs non-white)         | 0.81                                                    | (-2.67, 4.30)  | 0.65                                                      | 6.46  | (-4.24, 17.15)  | 0.24    |
| Next-of-kin/lives with patient (vs lives with patient) |                                                         |                | 0.10                                                      |       |                 | 0.86    |
| Next-of-kin, does not live with patient                | -0.93                                                   | (-2.93, 1.05)  |                                                           | 1.39  | (-3.49, 6.28)   |         |
| Not next-of-kin, does not live with patient            | -1.65                                                   | (-3.22, 0.07)  |                                                           | 0.48  | (-3.49, 4.46)   |         |
| Frequent visitor                                       | 5.31                                                    | (3.38, 7.23)   | <0.001                                                    | 3.84  | (-0.21, 7.91)   | 0.063   |
| Fixed effects – patient level                          |                                                         |                |                                                           |       |                 |         |
| Patient age (per 10 years)                             | 0.26                                                    | (-0.20, 0.73)  | 0.27                                                      | 2.19  | (0.61, 3.78)    | 0.007   |
| Patient sex – female (vs male)                         | 0.79                                                    | (-0.84, 2.43)  | 0.34                                                      | 1.29  | (-2.67, 5.26)   | 0.52    |
| Dependency (vs none)                                   |                                                         |                | 0.44                                                      |       |                 | 0.47    |
| Minor or major                                         | 1.34                                                    | (-0.74, 3.43)  |                                                           | 2.91  | (-1.48, 7.29)   |         |
| Total                                                  | 0.11                                                    | (-7.42, 7.64)  |                                                           | 4.27  | (-17.36, 25.91) |         |
| Surgical status (vs non-surgical)                      |                                                         |                | 0.25                                                      |       |                 | 0.68    |
| Planned elective/scheduled                             | -1.83                                                   | (-4.35, 0.68)  |                                                           | -1.09 | (-12.59, 10.41) |         |
| Unplanned                                              | -1.35                                                   | (-3.41, 0.71)  |                                                           | 2.35  | (-3.20, 7.91)   |         |
| ICNARC Physiology Score (per point)                    | 0.12                                                    | (0.01, 0.24)   | 0.040                                                     | 0.19  | (-0.04, 0.44)   | 0.12    |
| ICU length of stay (per day)                           | 0.03                                                    | (-0.04, 0.11)  | 0.39                                                      | -0.17 | (-0.39, 0.03)   | 0.11    |
| Advanced respiratory support                           | 3.03                                                    | (1.08, 4.97)   | 0.002                                                     | --    |                 |         |
| Fixed effects – ICU/hospital level                     |                                                         |                |                                                           |       |                 |         |

|                                        |                     |      |                      |       |
|----------------------------------------|---------------------|------|----------------------|-------|
| Hospital type (vs non-university)      |                     | 0.50 |                      | 0.55  |
| University                             | -0.41 (-4.27, 3.46) |      | -4.44 (-12.41, 3.53) |       |
| University affiliated                  | 1.51 (-1.37, 4.39)  |      | -0.86 (-6.56, 4.83)  |       |
| Number of ICU beds (per bed)           | 0.02 (-0.19, 0.23)  | 0.85 | 0.47 (0.02, 0.93)    | 0.042 |
| Random effects – SD (SE)               |                     |      |                      |       |
| Between ICUs                           | 2.06 (0.66)         |      | 3.33 (1.50)          |       |
| Within ICUs between patients           | 17.24 (0.50)        |      | 15.84 (1.06)         |       |
| Within patients between family members | 17.02 (0.40)        |      | 16.81 (0.66)         |       |

Coef, coefficient; SE, standard error.

<sup>a</sup> Five patients were missing age group on both the questionnaire and web portal – due to the very small amount of missing data in this key variable, these missing values were not imputed.



**Figure S2** Variation across ICUs in the mean: satisfaction with care domain score (A) before and (B) after adjustment; satisfaction with information domain score (C) before and (D) after adjustment; and satisfaction with the decision-making process domain score (E) before and (F) after adjustment



**Table S10** Sensitivity analyses – alternative approach to handling missing data (family members of ICU survivors)

| Variables                                              | Complete case<br>[N=2,351] |      |         | Traditional approach<br>[N=5,756] |      |         |
|--------------------------------------------------------|----------------------------|------|---------|-----------------------------------|------|---------|
|                                                        | Coef.                      | SE   | p-value | Coef.                             | SE   | p-value |
| Constant                                               | 72.60                      | 3.18 |         | 70.35                             | 2.49 |         |
| Family member age, years (vs <30)                      |                            |      | 0.61    |                                   |      | 0.20    |
| 30-39                                                  | 0.13                       | 1.40 |         | 1.47                              | 0.97 |         |
| 40-49                                                  | 0.85                       | 1.22 |         | 1.41                              | 0.86 |         |
| 50-59                                                  | 0.66                       | 1.20 |         | 1.58                              | 0.84 |         |
| 60-69                                                  | 0.65                       | 1.30 |         | 1.47                              | 0.88 |         |
| 70-79                                                  | 0.77                       | 1.47 |         | 1.69                              | 0.98 |         |
| 80+                                                    | -3.06                      | 2.26 |         | -1.22                             | 1.50 |         |
| Family member sex – female (vs male)                   | 0.94                       | 0.60 | 0.12    | 0.21                              | 0.43 | 0.63    |
| Family member ethnicity – white (vs non-white)         | 7.58                       | 1.58 | <0.001  | 3.99                              | 1.16 | 0.001   |
| Next-of-kin/lives with patient (vs lives with patient) |                            |      | 0.071   |                                   |      | 0.002   |
| Next-of-kin, does not live with patient                | -1.69                      | 0.85 |         | -1.36                             | 0.61 |         |
| Not next-of-kin, does not live with patient            | -1.42                      | 0.72 |         | -1.70                             | 0.50 |         |
| Frequent visitor                                       | 1.18                       | 0.82 | 0.15    | 2.21                              | 0.55 | <0.001  |
| Patient age (per 10 years)                             | -0.09                      | 0.22 | 0.67    | -0.07                             | 0.15 | 0.64    |
| Patient sex – female (vs male)                         | -1.20                      | 0.73 | 0.10    | 0.13                              | 0.52 | 0.79    |
| Dependency (vs none)                                   |                            |      | 0.70    |                                   |      | 0.45    |
| Minor or major                                         | -0.44                      | 0.92 |         | -0.19                             | 0.68 |         |
| Total                                                  | -2.19                      | 2.98 |         | -3.14                             | 2.51 |         |
| Surgical status (vs non-surgical)                      |                            |      | 0.056   |                                   |      | 0.47    |
| Planned elective/scheduled                             | -3.11                      | 1.30 |         | -0.93                             | 0.80 |         |
| Unplanned                                              | -0.44                      | 0.88 |         | 0.02                              | 0.62 |         |
| ICNARC Physiology Score (per point)                    | 0.08                       | 0.05 | 0.14    | 0.15                              | 0.04 | <0.001  |
| ICU length of stay (per day)                           | -0.04                      | 0.03 | 0.28    | -0.04                             | 0.03 | 0.17    |
| Advanced respiratory support                           | 1.39                       | 0.87 | 0.11    | 2.40                              | 0.60 | <0.001  |
| Hospital type (vs non-university)                      |                            |      | 0.42    |                                   |      | 0.34    |
| University                                             | 0.56                       | 2.36 |         | 1.45                              | 2.22 |         |

|    |                                         |      |      |      |       |      |      |
|----|-----------------------------------------|------|------|------|-------|------|------|
| 1  |                                         |      |      |      |       |      |      |
| 2  |                                         |      |      |      |       |      |      |
| 3  | University affiliated                   | 2.24 | 1.72 |      | 2.34  | 1.61 |      |
| 4  |                                         |      |      |      |       |      |      |
| 5  | Number of ICU beds (per bed)            | 0.07 | 0.12 | 0.59 | -0.02 | 0.11 | 0.83 |
| 6  | <hr/>                                   |      |      |      |       |      |      |
| 7  | Coef., coefficient; SE, standard error. |      |      |      |       |      |      |
| 8  |                                         |      |      |      |       |      |      |
| 9  |                                         |      |      |      |       |      |      |
| 10 |                                         |      |      |      |       |      |      |
| 11 |                                         |      |      |      |       |      |      |
| 12 |                                         |      |      |      |       |      |      |
| 13 |                                         |      |      |      |       |      |      |
| 14 |                                         |      |      |      |       |      |      |
| 15 |                                         |      |      |      |       |      |      |
| 16 |                                         |      |      |      |       |      |      |
| 17 |                                         |      |      |      |       |      |      |
| 18 |                                         |      |      |      |       |      |      |
| 19 |                                         |      |      |      |       |      |      |
| 20 |                                         |      |      |      |       |      |      |
| 21 |                                         |      |      |      |       |      |      |
| 22 |                                         |      |      |      |       |      |      |
| 23 |                                         |      |      |      |       |      |      |
| 24 |                                         |      |      |      |       |      |      |
| 25 |                                         |      |      |      |       |      |      |
| 26 |                                         |      |      |      |       |      |      |
| 27 |                                         |      |      |      |       |      |      |
| 28 |                                         |      |      |      |       |      |      |
| 29 |                                         |      |      |      |       |      |      |
| 30 |                                         |      |      |      |       |      |      |
| 31 |                                         |      |      |      |       |      |      |
| 32 |                                         |      |      |      |       |      |      |
| 33 |                                         |      |      |      |       |      |      |
| 34 |                                         |      |      |      |       |      |      |
| 35 |                                         |      |      |      |       |      |      |
| 36 |                                         |      |      |      |       |      |      |
| 37 |                                         |      |      |      |       |      |      |
| 38 |                                         |      |      |      |       |      |      |
| 39 |                                         |      |      |      |       |      |      |
| 40 |                                         |      |      |      |       |      |      |
| 41 |                                         |      |      |      |       |      |      |
| 42 |                                         |      |      |      |       |      |      |
| 43 |                                         |      |      |      |       |      |      |
| 44 |                                         |      |      |      |       |      |      |
| 45 |                                         |      |      |      |       |      |      |
| 46 |                                         |      |      |      |       |      |      |
| 47 |                                         |      |      |      |       |      |      |
| 48 |                                         |      |      |      |       |      |      |
| 49 |                                         |      |      |      |       |      |      |
| 50 |                                         |      |      |      |       |      |      |
| 51 |                                         |      |      |      |       |      |      |
| 52 |                                         |      |      |      |       |      |      |
| 53 |                                         |      |      |      |       |      |      |
| 54 |                                         |      |      |      |       |      |      |
| 55 |                                         |      |      |      |       |      |      |
| 56 |                                         |      |      |      |       |      |      |
| 57 |                                         |      |      |      |       |      |      |
| 58 |                                         |      |      |      |       |      |      |
| 59 |                                         |      |      |      |       |      |      |
| 60 |                                         |      |      |      |       |      |      |

For peer review only

**Table S11** Sensitivity analyses – alternative approaches to handling missing data (family members of ICU non-survivors)

| Variables                                              | Complete case<br>[N=547] |      |         | Traditional approach<br>[N=851] |      |         |
|--------------------------------------------------------|--------------------------|------|---------|---------------------------------|------|---------|
|                                                        | Coef.                    | SE   | p-value | Coef.                           | SE   | p-value |
| Constant                                               | 54.46                    | 7.72 |         | 56.28                           | 6.80 |         |
| Family member age, years (vs <30)                      |                          |      | 0.17    |                                 |      | 0.086   |
| 30-39                                                  | 4.38                     | 3.01 |         | 3.14                            | 2.44 |         |
| 40-49                                                  | 7.51                     | 2.75 |         | 4.87                            | 2.31 |         |
| 50-59                                                  | 6.19                     | 2.62 |         | 4.50                            | 2.22 |         |
| 60-69                                                  | 7.41                     | 2.85 |         | 5.94                            | 2.37 |         |
| 70-79                                                  | 6.99                     | 3.69 |         | 7.07                            | 2.82 |         |
| 80+                                                    | 7.52                     | 4.41 |         | 0.32                            | 3.61 |         |
| Family member sex – female (vs male)                   | -0.02                    | 1.43 | 0.99    | 0.40                            | 1.11 | 0.72    |
| Family member ethnicity – white (vs non-white)         | 9.64                     | 4.21 | 0.022   | 7.47                            | 3.58 | 0.037   |
| Next-of-kin/lives with patient (vs lives with patient) |                          |      | 0.97    |                                 |      | 0.38    |
| Next-of-kin, does not live with patient                | 0.13                     | 2.20 |         | 1.27                            | 1.82 |         |
| Not next-of-kin, does not live with patient            | -0.32                    | 1.81 |         | -0.82                           | 1.40 |         |
| Frequent visitor                                       | 1.32                     | 1.96 | 0.50    | 0.99                            | 1.51 | 0.51    |
| Patient age (per 10 years)                             | 0.69                     | 0.66 | 0.29    | 1.09                            | 0.55 | 0.048   |
| Patient sex – female (vs male)                         | 1.56                     | 1.69 | 0.36    | 2.02                            | 1.41 | 0.15    |
| Dependency (vs none)                                   |                          |      | 0.47    |                                 |      | 0.66    |
| Minor or major                                         | -0.61                    | 1.86 |         | -0.32                           | 1.58 |         |
| Total                                                  | 8.53                     | 7.42 |         | 5.59                            | 6.45 |         |
| Surgical status (vs non-surgical)                      |                          |      | 0.84    |                                 |      | 0.51    |
| Planned elective/scheduled                             | -0.33                    | 5.61 |         | -4.86                           | 4.22 |         |
| Unplanned                                              | -1.38                    | 2.33 |         | -0.44                           | 1.95 |         |
| ICNARC Physiology Score (per point)                    | 0.24                     | 0.10 | 0.022   | 0.18                            | 0.09 | 0.041   |
| ICU length of stay (per day)                           | -0.27                    | 0.09 | 0.003   | -0.33                           | 0.08 | <0.001  |
| Hospital type (vs non-university)                      |                          |      | 0.83    |                                 |      | 0.77    |
| University                                             | -1.15                    | 3.20 |         | -0.11                           | 3.01 |         |
| University affiliated                                  | 0.84                     | 2.29 |         | 1.49                            | 2.17 |         |

1  
2  
3 Number of ICU beds (per bed) 0.25 0.19 0.17 0.21 0.17 0.23  
4

---

5 Coef., coefficient; SE, standard error.  
6  
7  
8  
9  
10  
11  
12  
13  
14  
15  
16  
17  
18  
19  
20  
21  
22  
23  
24  
25  
26  
27  
28  
29  
30  
31  
32  
33  
34  
35  
36  
37  
38  
39  
40  
41  
42  
43  
44  
45  
46  
47  
48  
49  
50  
51  
52  
53  
54  
55  
56  
57  
58  
59  
60

For peer review only

1  
2  
3  
4  
5  
6  
7  
8  
9  
10  
11  
12  
13  
14  
15  
16  
17  
18  
19  
20  
21  
22  
23  
24  
25  
26  
27  
28  
29  
30  
31  
32  
33  
34  
35  
36  
37  
38  
39  
40  
41  
42  
43  
44  
45  
46  
47  
48  
49  
50  
51  
52  
53  
54  
55  
56  
57  
58  
59  
60

## STROBE Statement—checklist of items that should be included in reports of observational studies

|                              | Item No | Recommendation                                                                                                                                                                                                                                                                                                                                                                                                                                                         | Page No |
|------------------------------|---------|------------------------------------------------------------------------------------------------------------------------------------------------------------------------------------------------------------------------------------------------------------------------------------------------------------------------------------------------------------------------------------------------------------------------------------------------------------------------|---------|
| <b>Title and abstract</b>    | 1       | (a) Indicate the study's design with a commonly used term in the title or the abstract                                                                                                                                                                                                                                                                                                                                                                                 | 1       |
|                              |         | (b) Provide in the abstract an informative and balanced summary of what was done and what was found                                                                                                                                                                                                                                                                                                                                                                    | 2       |
| <b>Introduction</b>          |         |                                                                                                                                                                                                                                                                                                                                                                                                                                                                        |         |
| Background/rationale         | 2       | Explain the scientific background and rationale for the investigation being reported                                                                                                                                                                                                                                                                                                                                                                                   | 4       |
| Objectives                   | 3       | State specific objectives, including any prespecified hypotheses                                                                                                                                                                                                                                                                                                                                                                                                       | 4       |
| <b>Methods</b>               |         |                                                                                                                                                                                                                                                                                                                                                                                                                                                                        |         |
| Study design                 | 4       | Present key elements of study design early in the paper                                                                                                                                                                                                                                                                                                                                                                                                                | 4       |
| Setting                      | 5       | Describe the setting, locations, and relevant dates, including periods of recruitment, exposure, follow-up, and data collection                                                                                                                                                                                                                                                                                                                                        | 4       |
| Participants                 | 6       | (a) <i>Cohort study</i> —Give the eligibility criteria, and the sources and methods of selection of participants. Describe methods of follow-up<br><i>Case-control study</i> —Give the eligibility criteria, and the sources and methods of case ascertainment and control selection. Give the rationale for the choice of cases and controls<br><i>Cross-sectional study</i> —Give the eligibility criteria, and the sources and methods of selection of participants | 4-5     |
|                              |         | (b) <i>Cohort study</i> —For matched studies, give matching criteria and number of exposed and unexposed<br><i>Case-control study</i> —For matched studies, give matching criteria and the number of controls per case                                                                                                                                                                                                                                                 | N/A     |
| Variables                    | 7       | Clearly define all outcomes, exposures, predictors, potential confounders, and effect modifiers. Give diagnostic criteria, if applicable                                                                                                                                                                                                                                                                                                                               | 4-6     |
| Data sources/<br>measurement | 8*      | For each variable of interest, give sources of data and details of methods of assessment (measurement). Describe comparability of assessment methods if there is more than one group                                                                                                                                                                                                                                                                                   |         |
| Bias                         | 9       | Describe any efforts to address potential sources of bias                                                                                                                                                                                                                                                                                                                                                                                                              | 4       |
| Study size                   | 10      | Explain how the study size was arrived at                                                                                                                                                                                                                                                                                                                                                                                                                              | N/A     |
| Quantitative variables       | 11      | Explain how quantitative variables were handled in the analyses. If applicable, describe which groupings were chosen and why                                                                                                                                                                                                                                                                                                                                           | 5-6     |
| Statistical methods          | 12      | (a) Describe all statistical methods, including those used to control for confounding                                                                                                                                                                                                                                                                                                                                                                                  | 5-6     |
|                              |         | (b) Describe any methods used to examine subgroups and interactions                                                                                                                                                                                                                                                                                                                                                                                                    | N/A     |
|                              |         | (c) Explain how missing data were addressed                                                                                                                                                                                                                                                                                                                                                                                                                            | 5-6     |
|                              |         | (d) <i>Cohort study</i> —If applicable, explain how loss to follow-up was addressed<br><i>Case-control study</i> —If applicable, explain how matching of cases and controls was addressed<br><i>Cross-sectional study</i> —If applicable, describe analytical methods taking account of sampling strategy                                                                                                                                                              |         |
|                              |         | (e) Describe any sensitivity analyses                                                                                                                                                                                                                                                                                                                                                                                                                                  | 6       |

Continued on next page

| <b>Results</b>           |     |                                                                                                                                                                                                                                                                                                 |                                               |
|--------------------------|-----|-------------------------------------------------------------------------------------------------------------------------------------------------------------------------------------------------------------------------------------------------------------------------------------------------|-----------------------------------------------|
| Participants             | 13* | (a) Report numbers of individuals at each stage of study—eg numbers potentially eligible, examined for eligibility, confirmed eligible, included in the study, completing follow-up, and analysed<br>(b) Give reasons for non-participation at each stage<br>(c) Consider use of a flow diagram | 6<br><br>Supplementary materials<br>Figure S1 |
| Descriptive data         | 14* | (a) Give characteristics of study participants (eg demographic, clinical, social) and information on exposures and potential confounders                                                                                                                                                        | Page 6-7 & Tables 1 & 2                       |
|                          |     | (b) Indicate number of participants with missing data for each variable of interest                                                                                                                                                                                                             | Supplementary materials<br>Tables S10 & S11   |
|                          |     | (c) <i>Cohort study</i> —Summarise follow-up time (eg, average and total amount)                                                                                                                                                                                                                | N/A                                           |
| Outcome data             | 15* | <i>Cohort study</i> —Report numbers of outcome events or summary measures over time                                                                                                                                                                                                             | 7 & Table 3                                   |
|                          |     | <i>Case-control study</i> —Report numbers in each exposure category, or summary measures of exposure                                                                                                                                                                                            |                                               |
|                          |     | <i>Cross-sectional study</i> —Report numbers of outcome events or summary measures                                                                                                                                                                                                              |                                               |
| Main results             | 16  | (a) Give unadjusted estimates and, if applicable, confounder-adjusted estimates and their precision (eg, 95% confidence interval). Make clear which confounders were adjusted for and why they were included                                                                                    | 7 & 8, Table 4 & Supplement<br>Tables S7-9 &  |
|                          |     | (b) Report category boundaries when continuous variables were categorized                                                                                                                                                                                                                       |                                               |
|                          |     | (c) If relevant, consider translating estimates of relative risk into absolute risk for a meaningful time period                                                                                                                                                                                |                                               |
| Other analyses           | 17  | Report other analyses done—eg analyses of subgroups and interactions, and sensitivity analyses                                                                                                                                                                                                  | 10-13 & supplement                            |
| <b>Discussion</b>        |     |                                                                                                                                                                                                                                                                                                 |                                               |
| Key results              | 18  | Summarise key results with reference to study objectives                                                                                                                                                                                                                                        | 13-14                                         |
| Limitations              | 19  | Discuss limitations of the study, taking into account sources of potential bias or imprecision. Discuss both direction and magnitude of any potential bias                                                                                                                                      | 13-14                                         |
| Interpretation           | 20  | Give a cautious overall interpretation of results considering objectives, limitations, multiplicity of analyses, results from similar studies, and other relevant evidence                                                                                                                      | 13-14                                         |
| Generalisability         | 21  | Discuss the generalisability (external validity) of the study results                                                                                                                                                                                                                           | 13-14                                         |
| <b>Other information</b> |     |                                                                                                                                                                                                                                                                                                 |                                               |
| Funding                  | 22  | Give the source of funding and the role of the funders for the present study and, if applicable, for the original study on which the present article is based                                                                                                                                   | 15                                            |

\*Give information separately for cases and controls in case-control studies and, if applicable, for exposed and unexposed groups in cohort and cross-sectional studies.

**Note:** An Explanation and Elaboration article discusses each checklist item and gives methodological background and published examples of transparent reporting. The STROBE checklist is best used in conjunction with this article (freely

1  
2  
3  
4  
5  
6  
7  
8  
9  
10  
11  
12  
13  
14  
15  
16  
17  
18  
19  
20  
21  
22  
23  
24  
25  
26  
27  
28  
29  
30  
31  
32  
33  
34  
35  
36  
37  
38  
39  
40  
41  
42  
43  
44  
45  
46  
47  
48  
49  
50  
51  
52  
53  
54  
55  
56  
57  
58  
59  
60

available on the Web sites of PLoS Medicine at <http://www.plosmedicine.org/>, Annals of Internal Medicine at <http://www.annals.org/>, and Epidemiology at <http://www.epidem.com/>). Information on the STROBE Initiative is available at [www.strobe-statement.org](http://www.strobe-statement.org).

For peer review only
