# Supplementary material for: Family satisfaction with critical care in the UK: a multicentre cohort study
Source: PubMed Central journal article supplement (PMC6707657; doi:10.1136/bmjopen-2019-028956), 2019-08-20
Supplement: bmjopen-2019-028956supp001.pdf [file bmjopen-2019-028956supp001.pdf]

## **Supplementary material**

Family satisfaction with critical care in the United Kingdom: a multi-centre cohort study

**Table S1** Characteristics and outcomes for all admission to ICUs participating in the FREE study and ICNARC Case Mix Programme

|                                                                     | <b>CMP</b>                              | <b>FREE study</b>                      |
|---------------------------------------------------------------------|-----------------------------------------|----------------------------------------|
| Total number of ICUs [N]                                            | [209] <sup>a</sup>                      | [19] <sup>a</sup>                      |
| Total number of admissions [N]                                      | [149,779]                               | [18,270]                               |
| Age <i>mean</i> (SD)                                                | 61.5 (18.0)                             | 61.5 (18.0)                            |
| Sex <i>male</i> (%)                                                 | 82,444 (55.0)                           | 10,316 (56.5)                          |
| Ethnicity <i>n</i> (%)                                              |                                         |                                        |
| White                                                               | 135,767 (90.6)                          | 16,439 (90.0)                          |
| Asian                                                               | 4,815 (3.2)                             | 439 (2.4)                              |
| Black                                                               | 3,250 (2.2)                             | 327 (1.8)                              |
| Other                                                               | 2,434 (1.6)                             | 445 (2.4)                              |
| Not stated                                                          | 3,513 (2.3)                             | 620 (3.4)                              |
| Distance (km) from patient home to hospital <i>median</i> (IQR) [N] | 25.0 (54.2) 8.7 (3.9 19.3)<br>[128,169] | 31.7 (64.5) 9.2 (4.2 20.8)<br>[18,090] |
| APACHE II severe co-morbidities <i>n</i> (%)                        |                                         |                                        |
| 0                                                                   | 123,437 (82.4)                          | 14,742 (80.7)                          |
| 1                                                                   | 20,906 (14.0)                           | 2,648 (14.5)                           |
| 2                                                                   | 5,053 (3.4)                             | 793 (4.3)                              |
| 3 or more                                                           | 383 (0.3)                               | 87 (0.5)                               |
| Admission type <i>n</i> (%) [N]                                     | [149,765]                               | [18,270]                               |
| Medical                                                             | 87,940 (58.7)                           | 10,039 (54.9)                          |
| Elective surgery                                                    | 34,284 (22.9)                           | 4,761 (26.1)                           |
| Emergency surgery                                                   | 27,541 (18.4)                           | 3,470 (19.0)                           |
| Surgical status of surgical admissions <i>n</i> (%) [N]             | [61,825]                                | [8,231]                                |
| Planned surgery                                                     | 28,267 (45.7)                           | 3,985 (48.4)                           |
| Unplanned surgery                                                   | 33,558 (54.3)                           | 4,246 (51.6)                           |
| ICNARC Physiology Score <i>mean</i> (SD)                            | 16.9 (9.3)                              | 16.5 (9.2)                             |
| ICNARC predicted risk of death <i>median</i> (IQR) [N]              | 0.10 (0.03 0.33)<br>[142,654]           | 0.09 (0.03 0.30) [17,261]              |
| APACHE II Acute Physiology Score <i>mean</i> (SD)                   | 11.4 (6.1)                              | 11.3 (5.9)                             |
| APACHE II Score <i>mean</i> (SD)                                    | 15.7 (7.0)                              | 15.6 (6.9)                             |
| APACHE II predicted risk of death <i>median</i> (IQR) [N]           | 0.12 (0.04 0.29)<br>[132,197]           | 0.11 (0.04 0.28) [16,193]              |
| Mechanical ventilation during first 24 hrs <i>n</i> (%) [N]         | 58,687 (39.4) [148,975]                 | 7,008 (38.5) [18,187]                  |

---

|                                           |                         |                       |
|-------------------------------------------|-------------------------|-----------------------|
| ICU mortality <i>n</i> (%) [N]            | 21,505 (14.4) [149,779] | 2,560 (14.0) [18,270] |
| Acute hospital mortality <i>n</i> (%) [N] | 29,945 (21.0) [142,670] | 3,550 (20.6) [17,266] |

---

<sup>a</sup> excludes one ICU for which no CMP data were available

**Figure S1** Overview of patients, family members and questionnaires (distributed/returned)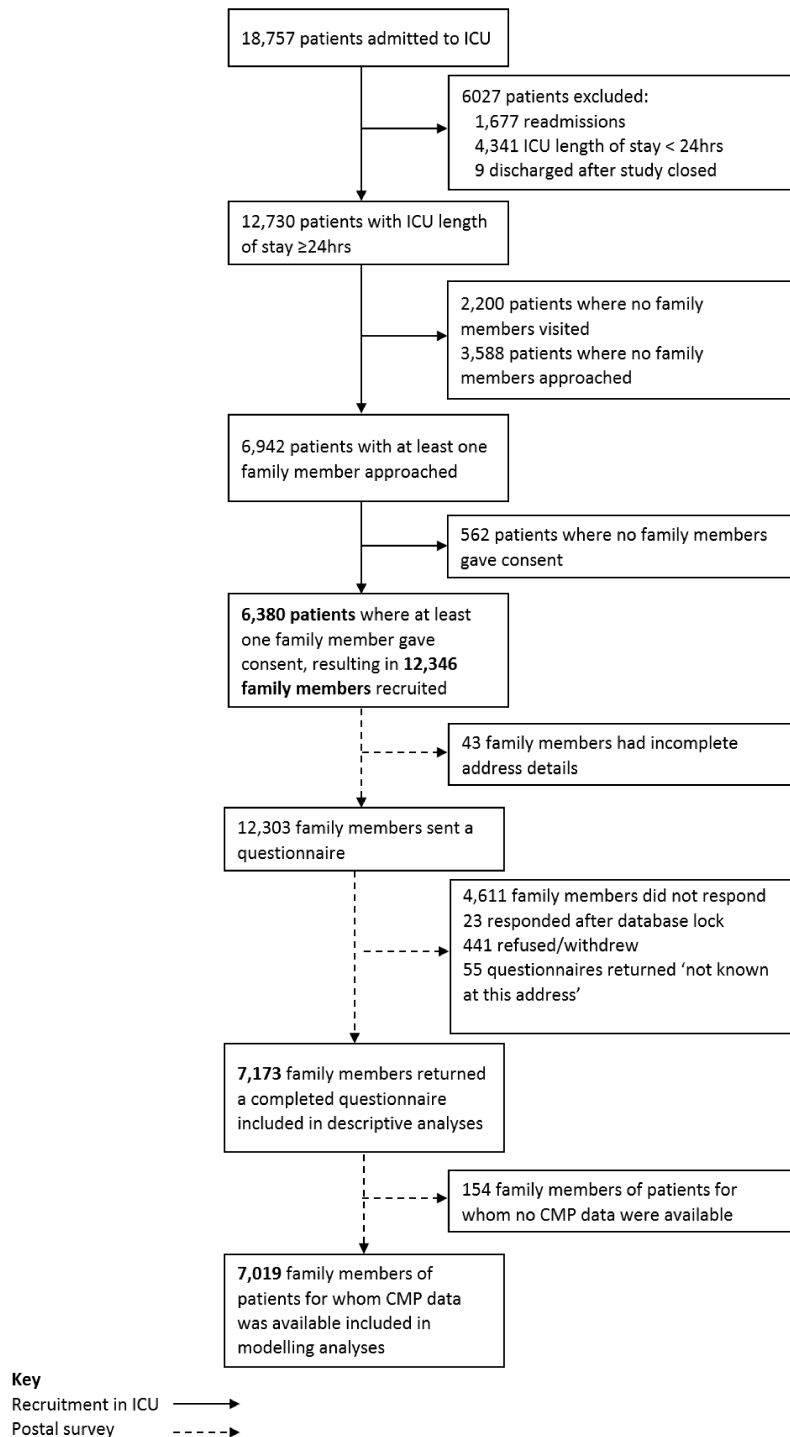

**Table S2** Characteristics of all recruited family members and by response to questionnaire

|                                                                            | All recruited family members | Those returning questionnaires | Did not respond           |
|----------------------------------------------------------------------------|------------------------------|--------------------------------|---------------------------|
| Total number of family members, N                                          | 12 346                       | 7173                           | 4611                      |
| Age group, <i>n</i> (%) [N]                                                | [12 068]                     | [7019]                         | [4500]                    |
| <30                                                                        | 1429 (11.8)                  | 530 (7.6)                      | 861 (19.1)                |
| 30-39                                                                      | 1590 (13.2)                  | 721 (10.3)                     | 827 (18.4)                |
| 40-49                                                                      | 2760 (22.9)                  | 1465 (20.9)                    | 1208 (26.9)               |
| 50-59                                                                      | 2646 (21.9)                  | 1654 (23.6)                    | 886 (19.7)                |
| 60-69                                                                      | 2131 (17.7)                  | 1580 (22.5)                    | 440 (9.8)                 |
| 70-79                                                                      | 1211 (10.0)                  | 862 (12.3)                     | 220 (4.8)                 |
| 80+                                                                        | 301 (2.5)                    | 207 (2.9)                      | 58 (1.3)                  |
| Sex, <i>n</i> (%) [N]                                                      | [12 145]                     | [7062]                         | [4529]                    |
| Female                                                                     | 7687 (63.3)                  | 4689 (66.4)                    | 2663 (58.8)               |
| Male                                                                       | 4458 (36.7)                  | 2373 (33.6)                    | 1866 (41.2)               |
| Ethnicity, <i>n</i> (%) [N]                                                | [12 090]                     | [7033]                         | [4505]                    |
| White                                                                      | 11 379 (94.1)                | 6747 (95.9)                    | 4111 (91.3)               |
| Asian                                                                      | 355 (2.9)                    | 142 (2.0)                      | 196 (4.4)                 |
| Black                                                                      | 161 (1.3)                    | 55 (0.8)                       | 101 (2.2)                 |
| Other                                                                      | 195 (1.6)                    | 89 (1.3)                       | 97 (2.1)                  |
| Deprivation, <i>n</i> (%) [N]                                              | [11 740]                     | [6832]                         | [4370]                    |
| 1 [least deprived]                                                         | 2113 (18.0)                  | 1376 (20.1)                    | 634 (14.5)                |
| 2                                                                          | 2406 (20.5)                  | 1502 (22.0)                    | 803 (18.4)                |
| 3                                                                          | 2415 (20.6)                  | 1443 (21.1)                    | 851 (19.5)                |
| 4                                                                          | 2545 (21.7)                  | 1380 (20.2)                    | 1045 (23.9)               |
| 5 [most deprived]                                                          | 2261 (19.3)                  | 1131 (16.6)                    | 1037 (23.7)               |
| Distance (km) from family member home to hospital, <i>median</i> (IQR) [N] | 11.6 (5.1-30.7)<br>[11 803]  | 12.3 (5.3-33.2)<br>[6867]      | 10.7 (4.6-29.4)<br>[4394] |
| Relationship, <i>n</i> (%) [N] "I am the patient's..."                     | [12 343]                     | [7173]                         | [4611]                    |
| Partner                                                                    | 3105 (25.2)                  | 2151 (30.0)                    | 786 (17.0)                |
| Child                                                                      | 4186 (33.9)                  | 2292 (32.0)                    | 1780 (38.6)               |
| Parent                                                                     | 1054 (8.5)                   | 665 (9.3)                      | 338 (7.3)                 |
| Sibling                                                                    | 1271 (10.3)                  | 717 (10.0)                     | 480 (10.4)                |
| Other relative                                                             | 1973 (16.0)                  | 987 (13.8)                     | 898 (19.5)                |
| Other non-relative                                                         | 754 (6.1)                    | 361 (5.0)                      | 329 (7.1)                 |
| Next-of-kin, <i>n</i> (%) [N]                                              | [11 702]                     | [6770]                         | [4389]                    |
| No                                                                         | 7086 (60.6)                  | 3747 (55.3)                    | 3009 (68.6)               |
| Yes                                                                        | 4616 (39.4)                  | 3023 (44.7)                    | 1380 (31.4)               |
| Lives with patient, <i>n</i> (%) [N]                                       | [12 343]                     | [7172]                         | [4609]                    |
| No                                                                         | 8255 (66.9)                  | 4543 (63.3)                    | 3357 (72.8)               |
| Yes                                                                        | 4088 (33.1)                  | 2629 (36.7)                    | 1252 (27.2)               |
| Education level, <i>n</i> (%) [N]                                          | [10 293]                     | [5971]                         | [3888]                    |
| NVQ 1 or 2                                                                 | 3147 (30.6)                  | 1731 (29.0)                    | 1284 (33.0)               |
| NVQ 3                                                                      | 2086 (20.3)                  | 1149 (19.2)                    | 870 (22.4)                |

|                                  |               |              |             |
|----------------------------------|---------------|--------------|-------------|
| NVQ 4 or 5                       | 2936 (28.5)   | 1819 (30.5)  | 1032 (26.5) |
| Other                            | 2124 (20.6)   | 1272 (21.3)  | 702 (18.1)  |
| <hr/>                            |               |              |             |
| First language, <i>n</i> (%) [N] | [12 346]      | [7 173]      | [4611]      |
| Not English                      | 335 (2.7)     | 140 (2.0)    | 182 (3.9)   |
| English                          | 12 011 (97.3) | 7 033 (98.0) | 4429 (96.1) |
| <hr/>                            |               |              |             |

**Table S3** Univariable analyses of factors associated with overall family satisfaction score by ICU outcome – family member characteristics

| Variables                                      | Family members of ICU survivors [N=6,147 <sup>a</sup> ] |                |         | Family members of ICU non-survivors [N=870] |                 |         |
|------------------------------------------------|---------------------------------------------------------|----------------|---------|---------------------------------------------|-----------------|---------|
|                                                | Coef.                                                   | 95% CI         | p-value | Coef.                                       | 95% CI          | p-value |
| Age, years (vs < 30)                           |                                                         |                | 0.031   |                                             |                 | 0.033   |
| 30-39                                          | 1.56                                                    | (-0.22, 3.33)  |         | 2.68                                        | (-1.80, 7.17)   |         |
| 40-49                                          | 0.42                                                    | (-0.10, 0.94)  |         | 1.61                                        | (0.21, 3.01)    |         |
| 50-59                                          | 2.12                                                    | (0.61, 3.64)   |         | 5.49                                        | (1.49, 9.50)    |         |
| 60-69                                          | 1.96                                                    | (0.39, 3.52)   |         | 6.01                                        | (1.78, 10.25)   |         |
| 70-79                                          | 1.98                                                    | (0.28, 3.68)   |         | 7.39                                        | (2.58, 12.19)   |         |
| 80+                                            | -0.55                                                   | (-3.05, 1.95)  |         | 2.62                                        | (-3.48, 8.73)   |         |
| Female (vs male)                               | 0.40                                                    | (-0.34, 1.14)  | 0.29    | 0.44                                        | (-1.59, 2.47)   | 0.67    |
| White ethnicity (vs non-white)                 | 3.60                                                    | (1.46, 5.75)   | 0.001   | 8.78                                        | (1.85, 15.70)   | 0.013   |
| Relationship (vs partner)                      |                                                         |                | <0.001  |                                             |                 | 0.28    |
| Parent                                         | 0.00                                                    | (-1.39, 1.39)  |         | 0.08                                        | (-5.73, 5.90)   |         |
| Child                                          | -0.94                                                   | (-1.83, -0.05) |         | -1.274                                      | (-3.69, 1.14)   |         |
| Sibling                                        | -2.16                                                   | (-3.50, -0.82) |         | 0.909                                       | (-3.02, 4.84)   |         |
| Other-relative                                 | -1.63                                                   | (-2.81, -0.44) |         | -0.619                                      | (-3.60, 2.36)   |         |
| Other-non relative                             | -3.42                                                   | (-5.22, -1.62) |         | -6.134                                      | (-11.69, -0.58) |         |
| Next of kin                                    | 1.74                                                    | (1.05, 2.44)   | <0.001  | 2.69                                        | (0.78, 4.59)    | 0.006   |
| Lives with patient                             | 1.95                                                    | (1.20, 2.69)   | <0.001  | 1.15                                        | (-0.99, 3.29)   | 0.29    |
| Education (vs NVQ 1 or 2)                      |                                                         |                | <0.001  |                                             |                 | 0.16    |
| NVQ 3                                          | -0.60                                                   | (-1.77, 0.57)  |         | 1.14                                        | (-2.09, 4.37)   |         |
| NVQ 4 or 5                                     | -2.43                                                   | (-3.49, -1.37) |         | -2.07                                       | (-4.92, 0.77)   |         |
| Other                                          | -0.18                                                   | (-1.35, 0.98)  |         | -1.75                                       | (-4.73, 1.24)   |         |
| Quintile of deprivation (vs 1, least deprived) |                                                         |                | 0.63    |                                             |                 | 0.77    |
| 2                                              | 0.49                                                    | (-0.74, 1.72)  |         | 0.64                                        | (-2.73, 4.01)   |         |
| 3                                              | 0.96                                                    | (-0.29, 2.20)  |         | 0.84                                        | (-2.59, 4.26)   |         |
| 4                                              | 0.32                                                    | (-0.97, 1.60)  |         | -1.07                                       | (-4.59, 2.44)   |         |
| 5 (most deprived)                              | 0.67                                                    | (-0.70, 2.05)  |         | 0.79                                        | (-3.10, 4.69)   |         |
| Distance from home to hospital (per 10 km)     | -0.05                                                   | (-0.11, 0.01)  | 0.12    | 0.05                                        | (-0.09, 0.18)   | 0.49    |
| Previous experience of ICU as a family member  | 0.25                                                    | (-0.63, 1.14)  | 0.58    | -0.68                                       | (-3.22, 1.87)   | 0.60    |
| Frequent visitor                               | 2.52                                                    | (1.63, 3.41)   | <0.001  | 2.91                                        | (0.36, 5.47)    | 0.030   |

Coef., coefficient.

<sup>a</sup> Two family members returned questionnaires but did not complete any of the 24 FS-ICU items – responses were not imputed for these family members.

**Table S4** Univariable analyses of factors associated with overall family satisfaction score by ICU outcome – patient characteristics

| Variables                                         | Family members of ICU survivors [N=6,147 <sup>a</sup> ] |                |         | Family members of ICU non-survivors [N=870] |                 |         |
|---------------------------------------------------|---------------------------------------------------------|----------------|---------|---------------------------------------------|-----------------|---------|
|                                                   | Coef.                                                   | 95% CI         | p-value | Coef.                                       | 95% CI          | p-value |
| Age (per 10 years)                                | -0.09                                                   | (-0.36, 0.17)  | 0.49    | 1.12                                        | (0.11, 2.14)    | 0.030   |
| Female (vs male)                                  | 0.67                                                    | (-0.25, 1.59)  | 0.16    | 2.04                                        | (-0.66, 4.74)   | 0.14    |
| White ethnicity (vs non-white)                    | 2.39                                                    | (0.11, 4.68)   | 0.040   | 9.25                                        | (2.38, 16.12)   | 0.008   |
| Quintile of deprivation (vs 1, least deprived)    |                                                         |                | 0.76    |                                             |                 | 0.95    |
| 2                                                 | 0.86                                                    | (-0.66, 2.38)  |         | -1.28                                       | (-5.85, 3.29)   |         |
| 3                                                 | 0.62                                                    | (-0.90, 2.13)  |         | -0.68                                       | (-5.12, 3.75)   |         |
| 4                                                 | 0.77                                                    | (-0.75, 2.28)  |         | -1.62                                       | (-6.03, 2.78)   |         |
| 5 (most deprived)                                 | 1.00                                                    | (-0.57, 2.57)  |         | -1.49                                       | (-6.04, 3.06)   |         |
| Distance from home to hospital (per 10 km)        | 0.12                                                    | (0.00, 0.24)   | 0.047   | 0.18                                        | (-0.05, 0.41)   | 0.12    |
| Severe comorbidities                              |                                                         |                |         |                                             |                 |         |
| Liver                                             | 3.18                                                    | (-0.01, 6.38)  | 0.050   | 1.25                                        | (-4.67, 7.19)   | 0.68    |
| Renal                                             | -0.45                                                   | (-3.57, 2.66)  | 0.77    | -8.87                                       | (-18.35, 0.60)  | 0.067   |
| Respiratory                                       | 0.01                                                    | (-2.84, 2.85)  | 1.00    | -1.02                                       | (-7.23, 5.19)   | 0.75    |
| Cardiovascular                                    | -0.14                                                   | (-3.23, 2.94)  | 0.93    | 1.40                                        | (-6.46, 9.26)   | 0.73    |
| Metastatic cancer                                 | -2.81                                                   | (-5.78, 0.15)  | 0.063   | 3.26                                        | (-6.38, 12.90)  | 0.51    |
| Haematological malignancy                         | 2.25                                                    | (-1.09, 5.61)  | 0.19    | -7.88                                       | (-14.62, -1.13) | 0.022   |
| Immunocompromise                                  | -0.91                                                   | (-2.74, 0.90)  | 0.33    | -3.90                                       | (-8.55, 0.74)   | 0.10    |
| Dependency (vs none)                              |                                                         |                | 0.30    |                                             |                 | 0.85    |
| Minor or major                                    | -0.14                                                   | (-1.36, 1.08)  |         | 0.63                                        | (-2.34, 3.60)   |         |
| Total                                             | -3.63                                                   | (-8.21, 0.94)  |         | 2.73                                        | (-10.21, 15.67) |         |
| Surgical status (vs non-surgical)                 |                                                         |                | 0.005   |                                             |                 | 0.78    |
| Planned elective/scheduled                        | -2.17                                                   | (-3.51, -0.83) |         | -2.83                                       | (-10.75, 5.10)  |         |
| Unplanned                                         | -0.17                                                   | (-1.29, 0.96)  |         | -0.06                                       | (-3.89, 3.76)   |         |
| ICNARC Physiology Score (per point)               | 0.19                                                    | (0.13, 0.25)   | <0.001  | 0.19                                        | (0.02, 0.35)    | 0.026   |
| ICU length of stay (per day)                      | 0.02                                                    | (-0.03, 0.06)  | 0.44    | -0.34                                       | (-0.48, -0.20)  | <0.001  |
| Advanced respiratory support                      | 3.62                                                    | (2.63, 4.61)   | <0.001  | 1.96                                        | (-1.84, 5.76)   | 0.31    |
| Advanced cardiovascular support                   | 2.06                                                    | (0.89, 3.22)   | 0.001   | 0.83                                        | (-2.06, 3.72)   | 0.58    |
| Renal support                                     | 1.52                                                    | (0.11, 2.93)   | 0.034   | 0.04                                        | (-2.83, 2.91)   | 0.98    |
| Neurological support                              | 1.96                                                    | (0.39, 3.54)   | 0.014   | 2.95                                        | (-0.42, 6.32)   | 0.086   |
| Duration of adv. respiratory support (per day)    | 0.11                                                    | (0.05, 0.16)   | <0.001  | -0.16                                       | (-0.32, 0.00)   | 0.051   |
| Duration of adv. cardiovascular support (per day) | 0.40                                                    | (0.15, 0.65)   | 0.002   | 0.11                                        | (-0.33, 0.56)   | 0.62    |
| Duration of renal support (per day)               | 0.16                                                    | (0.00, 0.32)   | 0.048   | -0.15                                       | (-0.43, 0.13)   | 0.28    |
| Duration of neurological support (per day)        | 0.10                                                    | (-0.09, 0.29)  | 0.31    | 0.05                                        | (-0.43, 0.53)   | 0.84    |
| Death before acute hospital discharge             | -0.49                                                   | (-1.52, 0.55)  | 0.36    | N/A                                         |                 |         |

Coef., coefficient.



<sup>a</sup> Two family members returned questionnaires but did not complete any of the 24 FS-ICU items – responses were not imputed for these family members.

**Table S5** Univariable analysis of factors associated with overall family satisfaction score by ICU outcome – ICU/hospital characteristics and contextual factors

| Variables                                              | Family members of ICU survivors [N=6,147 <sup>a</sup> ] |               |         | Family members of ICU non-survivors [N=870] |                |         |
|--------------------------------------------------------|---------------------------------------------------------|---------------|---------|---------------------------------------------|----------------|---------|
|                                                        | Coef.                                                   | 95% CI        | p-value | Coef.                                       | 95% CI         | p-value |
| Hospital type (vs non-university)                      |                                                         |               | 0.51    |                                             |                | 0.62    |
| University                                             | 0.06                                                    | (-3.63, 3.75) |         | -0.32                                       | (-4.72, 4.07)  |         |
| University affiliated                                  | 1.93                                                    | (-1.56, 5.42) |         | 1.68                                        | (-2.29, 5.65)  |         |
| Number of ICU beds (per bed)                           | -0.05                                                   | (-0.23, 0.14) | 0.63    | 0.02                                        | (-0.22, 0.26)  | 0.85    |
| Month of ICU admission (vs January)                    |                                                         |               | 0.95    |                                             |                | 0.85    |
| February                                               | -0.61                                                   | (-2.87, 1.65) |         | -0.03                                       | (-6.90, 6.83)  |         |
| March                                                  | 0.09                                                    | (-2.12, 2.30) |         | -0.06                                       | (-6.73, 6.60)  |         |
| April                                                  | 0.54                                                    | (-1.71, 2.79) |         | 0.07                                        | (-6.93, 7.07)  |         |
| May                                                    | -0.06                                                   | (-2.31, 2.18) |         | 0.73                                        | (-5.62, 7.08)  |         |
| June                                                   | -0.66                                                   | (-2.65, 1.34) |         | 0.84                                        | (-4.95, 6.64)  |         |
| July                                                   | 0.85                                                    | (-1.41, 3.11) |         | 3.91                                        | (-2.71, 10.52) |         |
| August                                                 | 0.65                                                    | (-1.64, 2.93) |         | -0.70                                       | (-6.87, 5.46)  |         |
| September                                              | 0.09                                                    | (-2.14, 2.31) |         | 1.74                                        | (-4.76, 8.25)  |         |
| October                                                | 0.44                                                    | (-1.76, 2.63) |         | 1.15                                        | (-5.69, 7.98)  |         |
| November                                               | 0.60                                                    | (-1.65, 2.85) |         | 2.21                                        | (-4.10, 8.53)  |         |
| December                                               | 0.69                                                    | (-1.57, 2.96) |         | 5.16                                        | (-1.13, 11.46) |         |
| Questionnaire received while patient still in hospital | 0.087                                                   | (-1.50, 1.67) | 0.91    | N/A                                         |                |         |

Coef., coefficient.

<sup>a</sup> Two family members returned questionnaires but did not complete any of the 24 FS-ICU items – responses were not imputed for these family members.

**Table S6** Sensitivity analyses –candidate determinants for the multivariable multilevel models for the family satisfaction in the intensive care unit

| Candidate determinants                                         | Justification inclusion/exclusion                                                                                                                                                                                | Approach to modelling                                                                                                  |
|----------------------------------------------------------------|------------------------------------------------------------------------------------------------------------------------------------------------------------------------------------------------------------------|------------------------------------------------------------------------------------------------------------------------|
| <b>Family member level</b>                                     |                                                                                                                                                                                                                  |                                                                                                                        |
| Education level                                                | It was not considered in the multivariable models due to higher than expected proportions of both “Not stated” (17%) and “Other” (21%) responses, suggesting a lack of comprehension of the categorisation used. |                                                                                                                        |
| Distance from home to hospital                                 | No significant after adjusting for other variables in the model. It was dropped.                                                                                                                                 |                                                                                                                        |
| Family member age, years                                       | Controlling effect                                                                                                                                                                                               | Categorical (<30;30-39;40-49;50-59;60-69;70-79;80+)                                                                    |
| Family member sex                                              | Controlling effect                                                                                                                                                                                               | Categorical (male; female)                                                                                             |
| Family member ethnicity                                        | Statistically significant in univariable                                                                                                                                                                         | Categorical (white; non-white)                                                                                         |
| Next-of-kin/lives with patient                                 | There was a strong multicollinearity between relationship to the patient and the other key variables of next-of-kin and lives with patient.                                                                      | Categorical (lives with patient; Next-of-kin, does not live with patient; Not next-of-kin, does not live with patient) |
| Frequent visitor                                               | Statistically significant in univariable                                                                                                                                                                         | Binary (yes; no)                                                                                                       |
| <b>Patient level</b>                                           |                                                                                                                                                                                                                  |                                                                                                                        |
| Patient ethnicity                                              | It was not carried forward to the multivariable models due to collinearity with family member ethnicity.                                                                                                         |                                                                                                                        |
| Patient age                                                    | Controlling effect                                                                                                                                                                                               | Continuous(linear)                                                                                                     |
| Patient sex                                                    | Controlling effect                                                                                                                                                                                               | Categorical (male; female)                                                                                             |
| Dependency                                                     | Controlling effect                                                                                                                                                                                               | Categorical (none; minor or major; total)                                                                              |
| Surgical status (vs non-surgical)                              | Controlling effect                                                                                                                                                                                               | Categorical (non-surgical; planned elective/scheduled; unplanned)                                                      |
| ICNARC Physiology Score                                        | Statistically significant in univariable                                                                                                                                                                         | Continuous(linear)                                                                                                     |
| ICU length of stay (days)                                      |                                                                                                                                                                                                                  | Continuous(linear)                                                                                                     |
| Organ support received in the ICU and duration (calendar days) | Once included in the multivariable model for                                                                                                                                                                     |                                                                                                                        |

|                                                    |                                                                                                                                                      |                                                                 |
|----------------------------------------------------|------------------------------------------------------------------------------------------------------------------------------------------------------|-----------------------------------------------------------------|
| of organ support among those receiving the support | survivors, only advanced respiratory support remained significant.                                                                                   |                                                                 |
| Advanced respiratory support                       | It was found to be preferable to alternative variable of the duration of advanced respiratory support, which was correlated with ICU length of stay. | Binary (yes; no)                                                |
| haematological malignancy                          | No significant after adjusting for other variables in the model. It was dropped.                                                                     |                                                                 |
| <b>ICU/hospital level</b>                          |                                                                                                                                                      |                                                                 |
| Hospital type                                      | Controlling effect                                                                                                                                   | Categorical (non-university; university; university affiliated) |
| Number of ICU beds                                 | Controlling effect                                                                                                                                   | Continuous(linear)                                              |

**Table S7** Multivariable multilevel models for the satisfaction with care domain score

| Variables                                              | Family members of ICU survivors [N=6,143 <sup>a</sup> ] |                 |         | Family members of ICU non-survivors [N=869 <sup>a</sup> ] |                |         |
|--------------------------------------------------------|---------------------------------------------------------|-----------------|---------|-----------------------------------------------------------|----------------|---------|
|                                                        | Coef.                                                   | 95% CI          | p-value | Coef.                                                     | 95% CI         | p-value |
| Fixed effects – family member level                    |                                                         |                 |         |                                                           |                |         |
| Constant                                               | 71.45                                                   | (66.67, 76.22)  |         | 55.29                                                     | (41.76, 68.82) |         |
| Family member age, years (vs <30)                      |                                                         |                 | 0.001   |                                                           |                | 0.16    |
| 30-39                                                  | 2.60                                                    | (0.81, 4.38)    |         | 2.50                                                      | (-1.97, 6.97)  |         |
| 40-49                                                  | 2.73                                                    | (1.16, 4.31)    |         | 4.31                                                      | (0.09, 8.54)   |         |
| 50-59                                                  | 2.91                                                    | (1.36, 4.44)    |         | 4.99                                                      | (0.93, 9.04)   |         |
| 60-69                                                  | 2.67                                                    | (1.08, 4.26)    |         | 4.89                                                      | (0.54, 9.23)   |         |
| 70-79                                                  | 2.66                                                    | (0.90, 4.41)    |         | 5.91                                                      | (0.88, 10.94)  |         |
| 80+                                                    | -0.17                                                   | (-2.76, 2.41)   |         | 1.85                                                      | (-4.51, 8.21)  |         |
| Family member sex – female (vs male)                   | 0.42                                                    | (-0.35, 1.20)   | 0.29    | 0.22                                                      | (-1.81, 2.25)  | 0.83    |
| Family member ethnicity – white (vs non-white)         | 3.87                                                    | (1.77, 5.97)    | <0.001  | 6.99                                                      | (0.19, 13.81)  | 0.044   |
| Next-of-kin/lives with patient (vs lives with patient) |                                                         |                 | <0.001  |                                                           |                | 0.15    |
| Next-of-kin, does not live with patient                | -1.14                                                   | (-2.26, -0.02)  |         | 0.95                                                      | (-2.39, 4.29)  |         |
| Not next-of-kin, does not live with patient            | -2.44                                                   | (-3.32, -1.55)  |         | -1.58                                                     | (-4.11, 0.94)  |         |
| Frequent visitor                                       | 2.49                                                    | (1.52, 3.46)    | <0.001  | 1.49                                                      | (-1.27, 4.25)  | 0.29    |
| Fixed effects – patient level                          |                                                         |                 |         |                                                           |                |         |
| Patient age (per 10 years)                             | 0.03                                                    | (-0.25, 0.31)   | 0.83    | 1.21                                                      | (0.16, 2.26)   | 0.024   |
| Patient sex – female (vs male)                         | 0.06                                                    | (-0.85, 0.98)   | 0.87    | 1.85                                                      | (-0.79, 4.5)   | 0.17    |
| Dependency (vs none)                                   |                                                         |                 | 0.006   |                                                           |                | 0.68    |
| Minor or major                                         | -0.74                                                   | (-1.96, 0.46)   |         | -0.94                                                     | (-3.98, 2.09)  |         |
| Total                                                  | -6.77                                                   | (-11.18, -2.36) |         | 3.62                                                      | (-8.71, 15.95) |         |
| Surgical status (vs non-surgical)                      |                                                         |                 | 0.68    |                                                           |                | 0.47    |
| Planned elective/scheduled                             | -0.62                                                   | (-2.04, 0.78)   |         | -4.85                                                     | (-12.71, 2.99) |         |
| Unplanned                                              | -0.15                                                   | (-1.27, 0.95)   |         | -0.57                                                     | (-4.29, 3.13)  |         |
| ICNARC Physiology Score (per point)                    | 0.14                                                    | (0.07, 0.21)    | <0.001  | 0.14                                                      | (-0.03, 0.30)  | 0.10    |
| ICU length of stay (per day)                           | -0.02                                                   | (-0.06, 0.02)   | 0.39    | -0.30                                                     | (-0.45, -0.15) | <0.001  |
| Advanced respiratory support                           | 2.74                                                    | (1.66, 3.82)    | <0.001  |                                                           |                |         |
| Fixed effects – ICU/hospital level                     |                                                         |                 |         |                                                           |                |         |
| Hospital type (vs non-university)                      |                                                         |                 | 0.51    |                                                           |                | 0.58    |

|                                        |                     |                              |
|----------------------------------------|---------------------|------------------------------|
| University                             | 0.94 (-3.58, 5.47)  | -1.48 (-7.8, 4.84)           |
| University affiliated                  | 1.92 (-1.34, 5.19)  | 1.79 (-2.75, 6.34)           |
| Number of ICU beds (per bed)           | -0.01 (-0.24, 0.23) | 0.96 0.24 (-0.12, 0.59) 0.19 |
| Random effects – SD (SE)               |                     |                              |
| Between ICUs                           | 2.98 (0.60)         | 3.25 (1.11)                  |
| Within ICUs between patients           | 9.76 (0.28)         | 10.47 (0.66)                 |
| Within patients between family members | 11.96 (0.19)        | 11.92 (0.42)                 |

Coef, coefficient; SE, standard error.

<sup>a</sup> Five patients were missing age group on both the questionnaire and web portal – due to the very small amount of missing data in this key variable, these missing values were not imputed.

**Table S8** Multivariable multilevel models for the satisfaction with information domain score

| Variables                                              | Family members of ICU survivors [N=6,143 <sup>a</sup> ] |                |         | Family members of ICU non-survivors [N=869 <sup>a</sup> ] |                |         |
|--------------------------------------------------------|---------------------------------------------------------|----------------|---------|-----------------------------------------------------------|----------------|---------|
|                                                        | Coef.                                                   | 95% CI         | p-value | Coef.                                                     | 95% CI         | p-value |
| Fixed effects – family member level                    |                                                         |                |         |                                                           |                |         |
| Constant                                               | 66.07                                                   | (59.78, 72.21) |         | 55.86                                                     | (39.34, 72.38) |         |
| Family member age, years (vs <30)                      |                                                         |                | 0.63    |                                                           |                | 0.28    |
| 30-39                                                  | 0.28                                                    | (-2.22, 2.79)  |         | 1.23                                                      | (-4.92, 7.39)  |         |
| 40-49                                                  | 0.00                                                    | (-2.21, 2.21)  |         | 1.88                                                      | (-3.92, 7.68)  |         |
| 50-59                                                  | 0.55                                                    | (-1.62, 2.72)  |         | 2.88                                                      | (-2.70, 8.48)  |         |
| 60-69                                                  | -0.1                                                    | (-2.35, 2.14)  |         | 4.24                                                      | (-1.71, 10.2)  |         |
| 70-79                                                  | -0.41                                                   | (-2.89, 2.08)  |         | 6.43                                                      | (-0.45, 13.31) |         |
| 80+                                                    | -2.67                                                   | (-6.35, 1.01)  |         | -1.96                                                     | (-10.71, 6.79) |         |
| Family member sex – female (vs male)                   | 0.20                                                    | (-0.89, 1.30)  | 0.72    | 1.01                                                      | (-1.81, 3.82)  | 0.49    |
| Family member ethnicity – white (vs non-white)         | 4.73                                                    | (1.78, 7.68)   | 0.002   | 9.34                                                      | (0.47, 18.21)  | 0.039   |
| Next-of-kin/lives with patient (vs lives with patient) |                                                         |                | <0.001  |                                                           |                | 0.38    |
| Next-of-kin, does not live with patient                | -2.39                                                   | (-3.97, 0.81)  |         | 1.43                                                      | (-3.09, 5.95)  |         |
| Not next-of-kin, does not live with patient            | -2.57                                                   | (-3.83, 1.31)  |         | -1.21                                                     | (-4.69, 2.28)  |         |
| Frequent visitor                                       | 2.11                                                    | (0.74, 3.48)   | 0.002   | 0.44                                                      | (-3.33, 4.22)  | 0.82    |
| Fixed effects – patient level                          |                                                         |                |         |                                                           |                |         |
| Patient age (per 10 years)                             | -0.22                                                   | (-0.61, 0.18)  | 0.28    | 0.92                                                      | (-0.43, 2.27)  | 0.18    |
| Patient sex – female (vs male)                         | 0.32                                                    | (-0.98, 1.62)  | 0.63    | 1.93                                                      | (-1.48, 5.35)  | 0.27    |
| Dependency (vs none)                                   |                                                         |                | 0.61    |                                                           |                | 0.51    |
| Minor or major                                         | -0.49                                                   | (-2.2, 1.2)    |         | -0.28                                                     | (-4.11, 3.53)  |         |
| Total                                                  | -2.69                                                   | (-8.92, 3.52)  |         | 9.15                                                      | (-6.57, 24.87) |         |
| Surgical status (vs non-surgical)                      |                                                         |                | 0.88    |                                                           |                | 0.84    |
| Planned elective/scheduled                             | -0.32                                                   | (-2.32, 1.66)  |         | -0.88                                                     | (-10.97, 9.21) |         |
| Unplanned                                              | 0.23                                                    | (-1.33, 1.80)  |         | -1.4                                                      | (-6.16, 3.36)  |         |
| ICNARC Physiology Score (per point)                    | 0.23                                                    | (0.13, 0.33)   | <0.001  | 0.15                                                      | (-0.04, 0.36)  | 0.13    |
| ICU length of stay (per day)                           | -0.05                                                   | (-0.11, 0.01)  | 0.14    | -0.43                                                     | (-0.62, -0.24) | <0.001  |
| Advanced respiratory support                           | 3.34                                                    | (1.83, 4.85)   | <0.001  | --                                                        |                |         |
| Fixed effects – ICU/hospital level                     |                                                         |                |         |                                                           |                |         |
| Hospital type (vs non-university)                      |                                                         |                | 0.45    |                                                           |                | 0.58    |

|                                        |       |               |      |       |               |      |
|----------------------------------------|-------|---------------|------|-------|---------------|------|
| University                             | 1.69  | (-3.71, 7.08) |      | 0.35  | (-6.42, 7.13) |      |
| University affiliated                  | 2.48  | (-1.42, 6.40) |      | 2.53  | (-2.32, 7.39) |      |
| Number of ICU beds (per bed)           | -0.03 | (-0.31, 0.24) | 0.81 | 0.21  | (-0.17, 0.61) | 0.27 |
| <hr/>                                  |       |               |      |       |               |      |
| Random effects – SD (SE)               |       |               |      |       |               |      |
| <hr/>                                  |       |               |      |       |               |      |
| Between ICUs                           | 3.48  | (0.73)        |      | 2.81  | (1.37)        |      |
| Within ICUs between patients           | 13.64 | (0.41)        |      | 12.38 | (0.97)        |      |
| Within patients between family members | 16.88 | (0.27)        |      | 17.02 | (0.60)        |      |

Coef, coefficient; SE, standard error.

<sup>a</sup> Five patients were missing age group on both the questionnaire and web portal – due to the very small amount of missing data in this key variable, these missing values were not imputed.



**Table S9** Multivariable multilevel models for the satisfaction with the decision-making process domain score

| Variables                                              | Family members of ICU survivors [N=6,143 <sup>a</sup> ] |               | Family members of ICU non-survivors [N=869 <sup>a</sup> ] |                      |                 |         |
|--------------------------------------------------------|---------------------------------------------------------|---------------|-----------------------------------------------------------|----------------------|-----------------|---------|
|                                                        | Coef.                                                   | 95% CI        | p-value                                                   | Coef.                | 95% CI          | p-value |
| Fixed effects – family member level                    |                                                         |               |                                                           |                      |                 |         |
| Constant                                               | 61.65 (55.17, 68.14)                                    |               |                                                           | 39.62 (20.14, 59.09) |                 |         |
| Family member age, years (vs <30)                      |                                                         |               | 0.061                                                     |                      |                 | 0.40    |
| 30-39                                                  | 1.66                                                    | (-1.63, 4.95) |                                                           | 1.37                 | (-5.35, 8.10)   |         |
| 40-49                                                  | 0.02                                                    | (-2.76, 2.82) |                                                           | 2.73                 | (-3.47, 8.95)   |         |
| 50-59                                                  | 0.52                                                    | (-2.21, 3.25) |                                                           | 3.34                 | (-2.61, 9.31)   |         |
| 60-69                                                  | -1.43                                                   | (-4.48, 1.61) |                                                           | 3.35                 | (-3.05, 9.77)   |         |
| 70-79                                                  | -1.09                                                   | (-4.32, 2.13) |                                                           | 6.25                 | (-1.36, 13.88)  |         |
| 80+                                                    | -3.87                                                   | (-8.43, 0.69) |                                                           | -3.13                | (-12.88, 6.61)  |         |
| Family member sex – female (vs male)                   | -0.18                                                   | (-1.42, 1.04) | 0.77                                                      | 1.66                 | (-1.37, 4.71)   | 0.28    |
| Family member ethnicity – white (vs non-white)         | 0.81                                                    | (-2.67, 4.30) | 0.65                                                      | 6.46                 | (-4.24, 17.15)  | 0.24    |
| Next-of-kin/lives with patient (vs lives with patient) |                                                         |               | 0.10                                                      |                      |                 | 0.86    |
| Next-of-kin, does not live with patient                | -0.93                                                   | (-2.93, 1.05) |                                                           | 1.39                 | (-3.49, 6.28)   |         |
| Not next-of-kin, does not live with patient            | -1.65                                                   | (-3.22, 0.07) |                                                           | 0.48                 | (-3.49, 4.46)   |         |
| Frequent visitor                                       | 5.31                                                    | (3.38, 7.23)  | <0.001                                                    | 3.84                 | (-0.21, 7.91)   | 0.063   |
| Fixed effects – patient level                          |                                                         |               |                                                           |                      |                 |         |
| Patient age (per 10 years)                             | 0.26                                                    | (-0.20, 0.73) | 0.27                                                      | 2.19                 | (0.61, 3.78)    | 0.007   |
| Patient sex – female (vs male)                         | 0.79                                                    | (-0.84, 2.43) | 0.34                                                      | 1.29                 | (-2.67, 5.26)   | 0.52    |
| Dependency (vs none)                                   |                                                         |               | 0.44                                                      |                      |                 | 0.47    |
| Minor or major                                         | 1.34                                                    | (-0.74, 3.43) |                                                           | 2.91                 | (-1.48, 7.29)   |         |
| Total                                                  | 0.11                                                    | (-7.42, 7.64) |                                                           | 4.27                 | (-17.36, 25.91) |         |
| Surgical status (vs non-surgical)                      |                                                         |               | 0.25                                                      |                      |                 | 0.68    |
| Planned elective/scheduled                             | -1.83                                                   | (-4.35, 0.68) |                                                           | -1.09                | (-12.59, 10.41) |         |
| Unplanned                                              | -1.35                                                   | (-3.41, 0.71) |                                                           | 2.35                 | (-3.20, 7.91)   |         |
| ICNARC Physiology Score (per point)                    | 0.12                                                    | (0.01, 0.24)  | 0.040                                                     | 0.19                 | (-0.04, 0.44)   | 0.12    |
| ICU length of stay (per day)                           | 0.03                                                    | (-0.04, 0.11) | 0.39                                                      | -0.17                | (-0.39, 0.03)   | 0.11    |
| Advanced respiratory support                           | 3.03                                                    | (1.08, 4.97)  | 0.002                                                     | --                   |                 |         |
| Fixed effects – ICU/hospital level                     |                                                         |               |                                                           |                      |                 |         |

|                                        |                     |      |                      |       |
|----------------------------------------|---------------------|------|----------------------|-------|
| Hospital type (vs non-university)      |                     | 0.50 |                      | 0.55  |
| University                             | -0.41 (-4.27, 3.46) |      | -4.44 (-12.41, 3.53) |       |
| University affiliated                  | 1.51 (-1.37, 4.39)  |      | -0.86 (-6.56, 4.83)  |       |
| Number of ICU beds (per bed)           | 0.02 (-0.19, 0.23)  | 0.85 | 0.47 (0.02, 0.93)    | 0.042 |
| Random effects – SD (SE)               |                     |      |                      |       |
| Between ICUs                           | 2.06 (0.66)         |      | 3.33 (1.50)          |       |
| Within ICUs between patients           | 17.24 (0.50)        |      | 15.84 (1.06)         |       |
| Within patients between family members | 17.02 (0.40)        |      | 16.81 (0.66)         |       |

Coef, coefficient; SE, standard error.

<sup>a</sup> Five patients were missing age group on both the questionnaire and web portal – due to the very small amount of missing data in this key variable, these missing values were not imputed.

**Figure S2** Variation across ICUs in the mean: satisfaction with care domain score (A) before and (B) after adjustment; satisfaction with information domain score (C) before and (D) after adjustment; and satisfaction with the decision-making process domain score (E) before and (F) after adjustment

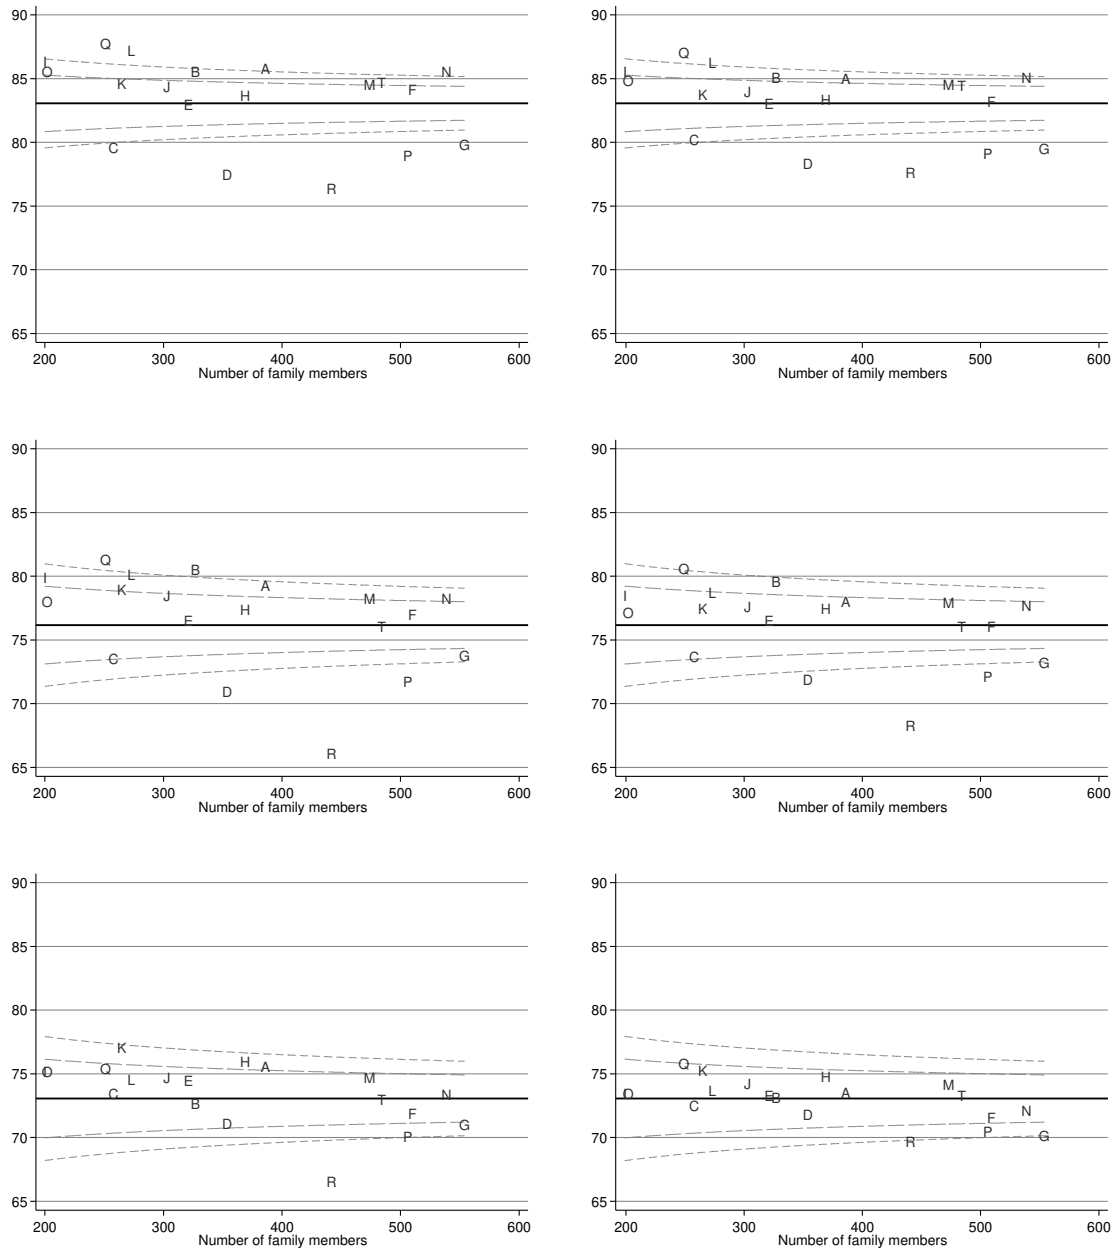

**Table S10** Sensitivity analyses – alternative approach to handling missing data (family members of ICU survivors)

| Variables                                              | Complete case<br>[N=2,351] |      |         | Traditional approach<br>[N=5,756] |      |         |
|--------------------------------------------------------|----------------------------|------|---------|-----------------------------------|------|---------|
|                                                        | Coef.                      | SE   | p-value | Coef.                             | SE   | p-value |
| Constant                                               | 72.60                      | 3.18 |         | 70.35                             | 2.49 |         |
| Family member age, years (vs <30)                      |                            |      | 0.61    |                                   |      | 0.20    |
| 30-39                                                  | 0.13                       | 1.40 |         | 1.47                              | 0.97 |         |
| 40-49                                                  | 0.85                       | 1.22 |         | 1.41                              | 0.86 |         |
| 50-59                                                  | 0.66                       | 1.20 |         | 1.58                              | 0.84 |         |
| 60-69                                                  | 0.65                       | 1.30 |         | 1.47                              | 0.88 |         |
| 70-79                                                  | 0.77                       | 1.47 |         | 1.69                              | 0.98 |         |
| 80+                                                    | -3.06                      | 2.26 |         | -1.22                             | 1.50 |         |
| Family member sex – female (vs male)                   | 0.94                       | 0.60 | 0.12    | 0.21                              | 0.43 | 0.63    |
| Family member ethnicity – white (vs non-white)         | 7.58                       | 1.58 | <0.001  | 3.99                              | 1.16 | 0.001   |
| Next-of-kin/lives with patient (vs lives with patient) |                            |      | 0.071   |                                   |      | 0.002   |
| Next-of-kin, does not live with patient                | -1.69                      | 0.85 |         | -1.36                             | 0.61 |         |
| Not next-of-kin, does not live with patient            | -1.42                      | 0.72 |         | -1.70                             | 0.50 |         |
| Frequent visitor                                       | 1.18                       | 0.82 | 0.15    | 2.21                              | 0.55 | <0.001  |
| Patient age (per 10 years)                             | -0.09                      | 0.22 | 0.67    | -0.07                             | 0.15 | 0.64    |
| Patient sex – female (vs male)                         | -1.20                      | 0.73 | 0.10    | 0.13                              | 0.52 | 0.79    |
| Dependency (vs none)                                   |                            |      | 0.70    |                                   |      | 0.45    |
| Minor or major                                         | -0.44                      | 0.92 |         | -0.19                             | 0.68 |         |
| Total                                                  | -2.19                      | 2.98 |         | -3.14                             | 2.51 |         |
| Surgical status (vs non-surgical)                      |                            |      | 0.056   |                                   |      | 0.47    |
| Planned elective/scheduled                             | -3.11                      | 1.30 |         | -0.93                             | 0.80 |         |
| Unplanned                                              | -0.44                      | 0.88 |         | 0.02                              | 0.62 |         |
| ICNARC Physiology Score (per point)                    | 0.08                       | 0.05 | 0.14    | 0.15                              | 0.04 | <0.001  |
| ICU length of stay (per day)                           | -0.04                      | 0.03 | 0.28    | -0.04                             | 0.03 | 0.17    |
| Advanced respiratory support                           | 1.39                       | 0.87 | 0.11    | 2.40                              | 0.60 | <0.001  |
| Hospital type (vs non-university)                      |                            |      | 0.42    |                                   |      | 0.34    |
| University                                             | 0.56                       | 2.36 |         | 1.45                              | 2.22 |         |

---

|                              |      |      |      |       |      |      |
|------------------------------|------|------|------|-------|------|------|
| University affiliated        | 2.24 | 1.72 |      | 2.34  | 1.61 |      |
| Number of ICU beds (per bed) | 0.07 | 0.12 | 0.59 | -0.02 | 0.11 | 0.83 |

---

Coef., coefficient; SE, standard error.

**Table S11** Sensitivity analyses – alternative approaches to handling missing data (family members of ICU non-survivors)

| Variables                                              | Complete case<br>[N=547] |      |         | Traditional approach<br>[N=851] |      |         |
|--------------------------------------------------------|--------------------------|------|---------|---------------------------------|------|---------|
|                                                        | Coef.                    | SE   | p-value | Coef.                           | SE   | p-value |
| Constant                                               | 54.46                    | 7.72 |         | 56.28                           | 6.80 |         |
| Family member age, years (vs <30)                      |                          |      | 0.17    |                                 |      | 0.086   |
| 30-39                                                  | 4.38                     | 3.01 |         | 3.14                            | 2.44 |         |
| 40-49                                                  | 7.51                     | 2.75 |         | 4.87                            | 2.31 |         |
| 50-59                                                  | 6.19                     | 2.62 |         | 4.50                            | 2.22 |         |
| 60-69                                                  | 7.41                     | 2.85 |         | 5.94                            | 2.37 |         |
| 70-79                                                  | 6.99                     | 3.69 |         | 7.07                            | 2.82 |         |
| 80+                                                    | 7.52                     | 4.41 |         | 0.32                            | 3.61 |         |
| Family member sex – female (vs male)                   | -0.02                    | 1.43 | 0.99    | 0.40                            | 1.11 | 0.72    |
| Family member ethnicity – white (vs non-white)         | 9.64                     | 4.21 | 0.022   | 7.47                            | 3.58 | 0.037   |
| Next-of-kin/lives with patient (vs lives with patient) |                          |      | 0.97    |                                 |      | 0.38    |
| Next-of-kin, does not live with patient                | 0.13                     | 2.20 |         | 1.27                            | 1.82 |         |
| Not next-of-kin, does not live with patient            | -0.32                    | 1.81 |         | -0.82                           | 1.40 |         |
| Frequent visitor                                       | 1.32                     | 1.96 | 0.50    | 0.99                            | 1.51 | 0.51    |
| Patient age (per 10 years)                             | 0.69                     | 0.66 | 0.29    | 1.09                            | 0.55 | 0.048   |
| Patient sex – female (vs male)                         | 1.56                     | 1.69 | 0.36    | 2.02                            | 1.41 | 0.15    |
| Dependency (vs none)                                   |                          |      | 0.47    |                                 |      | 0.66    |
| Minor or major                                         | -0.61                    | 1.86 |         | -0.32                           | 1.58 |         |
| Total                                                  | 8.53                     | 7.42 |         | 5.59                            | 6.45 |         |
| Surgical status (vs non-surgical)                      |                          |      | 0.84    |                                 |      | 0.51    |
| Planned elective/scheduled                             | -0.33                    | 5.61 |         | -4.86                           | 4.22 |         |
| Unplanned                                              | -1.38                    | 2.33 |         | -0.44                           | 1.95 |         |
| ICNARC Physiology Score (per point)                    | 0.24                     | 0.10 | 0.022   | 0.18                            | 0.09 | 0.041   |
| ICU length of stay (per day)                           | -0.27                    | 0.09 | 0.003   | -0.33                           | 0.08 | <0.001  |
| Hospital type (vs non-university)                      |                          |      | 0.83    |                                 |      | 0.77    |
| University                                             | -1.15                    | 3.20 |         | -0.11                           | 3.01 |         |
| University affiliated                                  | 0.84                     | 2.29 |         | 1.49                            | 2.17 |         |

---

|                              |      |      |      |      |      |      |
|------------------------------|------|------|------|------|------|------|
| Number of ICU beds (per bed) | 0.25 | 0.19 | 0.17 | 0.21 | 0.17 | 0.23 |
|------------------------------|------|------|------|------|------|------|

---

Coef., coefficient; SE, standard error.
